# Supplementary material for: Danhong Injection and Trimetazidine Protect Cardiomyocytes and Enhance Calcium Handling after Myocardial Infarction
Source: Evid Based Complement Alternat Med. 2021 Jan 15;2021:2480465. doi: 10.1155/2021/2480465 (PMC7822665; doi:10.1155/2021/2480465)
Supplement: Supplementary Materials — Table S1: RNA-seq data of DHI in resisting myocardial ischemia. Table S2: calcium transient and sarcomere shortening amplitude changed fold in myocytes. [file 2480465.f1.zip]

Archive with 3 entries (2 files):
- Zhang.Supplementary materials/
- Zhang.Supplementary materials/Zhang.TableS1.xlsx
- Zhang.Supplementary materials/Zhang.TableS2.docx
