# Supplementary material for: Danhong Injection and Trimetazidine Protect Cardiomyocytes and Enhance Calcium Handling after Myocardial Infarction
Source: Evid Based Complement Alternat Med. 2021 Jan 15;2021:2480465. doi: 10.1155/2021/2480465 (PMC7822665; doi:10.1155/2021/2480465)
Supplement: Supplementary Materials — Table S1: RNA-seq data of DHI in resisting myocardial ischemia. Table S2: calcium transient and sarcomere shortening amplitude changed fold in myocytes. [file 2480465.f1.zip › Zhang.Supplementary materials/Zhang.TableS1.xlsx]

## Sheet: Rna-seq data
	FPKM
Gene symbol	Sham_1	Sham_2	Sham_3	MI_1	MI_2	MI_3	D0.42+MI_1	D0.42+MI_2	D0.42+MI_3	TMZ+MI_1	TMZ+MI_2	TMZ+MI_3
Slc15a2	0.565898	0.426251	0.416014	0.298968	0.26959	0.45674	0.338583	0.37203	0.282362	0.291526	0.272889	0.184428
AABR07001766.4	0	0	0	0	0	0	0	0	1.07206	0	0	0.787758
Reps2	0.223409	0.246988	0.213507	0.0902569	0.13836	0.142066	0.556058	0.745108	0.644064	0.195153	0.200075	0.394385
LOC103690070	0	0	0	0	0	0	0	0	0	0	0	0
Tmem79	0.340495	0.443653	0.406755	0.842553	0.632617	0.825488	0.940176	1.07351	0.971386	1.11537	0.927502	1.0068
Pip4k2b	9.88805	10.3957	10.624	8.26135	1.41318	8.20394	15.1271	15.8428	15.8766	10.9118	12.366	10.3493
Ptpn23	5.04984	5.67261	5.47589	8.78877	5.75777	9.33588	10.0406	9.75949	9.96253	9.96164	10.6521	9.25692
AC104053.1	0	0	0	0	0	0	0	0	0	0	0	0
Camsap1	5.16927	5.13532	5.52305	5.51987	3.4274	5.04517	7.4192	7.00913	7.35755	6.01775	6.22324	5.63406
Igkv4-80	0	0	0	0.127373	0	0	0	0	0	0	0	0
Pgrmc2	51.7566	51.0911	47.7634	52.2612	41.4728	48.7624	55.4502	54.6643	56.6627	48.9274	51.0144	52.0283
Cacnb3	1.79418	2.44129	1.73665	2.98302	1.75221	2.83037	3.09161	2.60357	2.80173	2.77285	3.62557	3.16728
Olr392	0	0	0	0	0	0	0	0	0	0	0	0
AABR07002337.1	0.0251025	0.0475747	0	0.0608482	0	0.0239441	0.0234298	0	0.0542758	0.0219277	0	0.0265881
Adora1	3.29833	3.28312	3.52299	2.25073	1.85387	2.35298	2.74223	3.22389	3.51584	2.85697	2.15953	2.20181
Tnp2	0	0	0	0	0.0974522	0.600377	0	0.196803	0.0756067	0.0916362	0	0.111112
Gas7	10.1311	9.81435	9.80543	13.8235	7.52317	13.3874	23.4593	25.1198	25.4863	13.7256	15.1987	15.2075
Kcnf1	0	0	0	0	0	0	0	0.0135718	0	0	0	0
AABR07054451.1	0	0	0	0	0	0	0	0	0	0	0	0
Srrm4	1.63821	2.10028	1.96468	0.447711	0.08952	1.0111	1.16927	1.26549	1.01864	1.17848	0.776703	0.816547
AABR07043012.1	0.743741	0	0	0	0	0	0	0	0	0	0	0
Acot3	11.1077	10.6962	11.0881	7.90308	6.34995	7.54955	8.26884	8.07102	7.42217	7.97441	7.32978	7.43058
Olr1588	0.121618	0	0	0.0737004	0.282448	0.116006	0.227028	0.45632	0.306785	0.212473	0.108916	0.128816
AABR07047851.1	0	0	0.401745	0	0	0	0	0	0	0	0	0
Ralbp1	19.2882	19.9378	19.3565	21.8789	17.6291	20.1317	27.9671	29.3865	27.732	22.7701	23.0657	23.2045
Fmo13	0	0	0	0	0	0	0	0	0	0	0	0
5S_rRNA	0	0	0	0	0	0	0	0	0	0	0	0
LOC690276	0.176149	0.111281	0.448913	0.747223	0.763638	0.784095	0.602842	0.587489	0.50782	0.410323	0.473255	0.373149
LOC684871	3.61444	3.93885	0	0	31.7302	0	15.5185	0.339041	0	0	20.3927	15.3134
Ddx28	2.9742	4.3272	3.47402	4.80629	4.96769	3.86856	4.7108	4.32098	5.06662	5.03862	4.92355	3.78663
AABR07004025.1	0	0	0	0	0	0	0	0	0	0	0	0
Crip3	0	0	0.111215	0	0	0	0.0543091	0	0.0419363	0	0.0521092	0.06163
AABR07032757.1	0	0	0	0	0	0	0	0	0	0	0	0
Olr1437	0	0	0	0	0	0	0	0	0	0	0	0
Rn50_11_0375.7	0	0	0	0	0	0	0	0	0	0	0	0
Rai2	4.57035	5.57444	5.12459	4.20929	3.48905	4.03572	4.30804	4.48516	5.02248	4.98052	4.64009	5.03256
AABR07017270.1	0	0	0	0	0	0	0	0	0	0	0	0
RGD1305537	2.50459	2.50167	2.29655	3.22016	2.89264	2.90556	4.16995	5.27017	4.70795	3.4	3.66762	4.08678
Mir3557	11.2943	15.081	7.85002	15.5553	2.86147	11.7525	4.31253	5.45767	5.92007	13.4535	9.19519	5.43762
LOC103692042	0	0	0	0	0	0	0	0	0	0	0	0
Tbc1d14	10.8598	12.8636	11.248	10.6897	6.95281	10.3866	14.9851	15.8674	16.9442	10.8067	10.8952	10.8652
Wnk1	17.6299	18.7257	19.1692	19.9189	14.2335	20.8154	26.7662	26.6446	28.0924	23.0616	24.0736	23.422
Wrap73	4.6021	3.44079	4.51919	5.50098	5.5303	5.92009	6.10819	6.01983	5.87294	6.93368	6.20107	6.03719
Iqcj	0	0	0	0	0	0	0	0	0	0	0	0
AABR07035064.1	0	0	0	0	0	0	0	0	0	0	0	0
Alox15	3.06983	3.05818	2.45735	4.65872	4.41171	4.78016	1.6163	1.57514	1.55064	5.86737	5.89786	5.19685
Rfpl4b	0	0	0	0	0	0	0	0	0	0	0	0
Slc14a1	0.337138	0.570492	0.483294	0.321051	0.201336	0.34455	0.584392	0.361419	0.208271	0.273463	0.345058	0.382597
Zfp3	2.17751	2.53444	2.14887	1.96501	2.33066	1.80611	1.8115	1.83533	1.94467	2.04684	1.67453	1.98048
Olr450	0	0	0	0	0	0	0	0	0	0	0	0
Crocc	1.56505	1.47477	1.48733	1.54714	0.885324	1.63461	1.47709	1.602	1.56907	1.90938	1.87923	1.63915
LOC691196	0.0945588	0	0	0	0	0	0	0	0	0	0	0
#N/A	3.81791	3.91697	4.14492	4.33114	1.52272	4.19526	8.10577	8.09844	8.03483	5.34496	5.54358	5.10066
AABR07035486.1	0	0.206276	0	0.131914	0.101109	0.207635	0.203175	0.408376	0.392218	0.285224	0.0974725	0.230563
Ppp4r3a	9.59761	10.7264	10.4756	13.3162	11.8456	12.0816	16.0545	16.4917	15.3088	13.2979	13.5722	12.9643
Mdc1	5.68349	5.08653	5.07498	7.06233	1.25328	6.81759	12.1099	12.3677	12.2473	8.32461	8.53456	8.36092
Tmem261	24.6816	25.0907	25.6223	22.5767	28.985	23.2254	20.9879	19.3868	19.323	22.1412	21.5676	21.844
Stk24	11.8786	12.5652	12.5402	11.9137	7.35656	13.2189	22.2171	24.1562	22.133	14.5187	14.3901	15.4101
Chd2	10.9426	11.6291	11.4661	10.5334	5.10969	10.2712	13.6335	13.8365	13.4977	10.6764	11.4219	11.0006
#N/A	0	0	0	0	0	0	0	0	0	0	0	0
LOC684762	0	0.133753	0	0.256606	0.524487	0.134634	0.131743	0.441331	0	0	0.379218	0.299003
AC108572.1	0	0	0	0	0	0	0	0	0	0	0	0
AABR07005692.1	0	0	0	0	0	0	0	0	0	0	0	0
LOC685085	9.19245	7.76914	7.00429	12.2704	18.0022	12.4414	9.8553	8.93341	10.9227	12.3703	12.7935	13.0258
Tsks	0.149747	0.170282	0	0.0907462	0.111288	0.0285672	0.0279536	0.0749147	0.0863407	0.209292	0.0536426	0.0317218
Grina	47.2798	52.1511	46.8104	67.8713	72.2195	65.2906	63.8577	64.2681	63.6	67.395	68.6551	64.0097
AABR07068308.1	0	0	0	0	0	0	0	0	0	0	0	0
42795	0.687061	0.735987	0.285483	0.199128	0.249753	0.455899	0.223053	0.186804	0.301414	0.31313	0.187266	0.189841
Pdss2	13.775	13.2391	14.6094	10.0443	11.9642	11.5103	10.6359	11.3805	10.7957	11.2991	11.2581	10.3496
AABR07007798.1	0	0.0670397	0.338053	0.21436	0.197162	0.877258	0.0660319	0.398167	0.101977	0.247194	0.126714	0.524532
Hp	0.491626	0.885152	0.89269	1.10232	0.959078	0.703408	0.688299	0.891564	0.850383	2.0184	1.585	2.49946
AABR07051215.1	0	0	0	0	0	0	0	0	0	0	0	0
Arhgap33	0.816873	0.918396	0.860059	1.07395	0.347269	1.17537	1.1372	1.09092	1.21739	1.39084	1.35152	1.15851
Kctd15	2.87982	2.96511	2.83158	4.96702	4.50164	5.52027	6.15121	6.70137	6.50607	4.64419	5.38127	4.60472
Serpinb9d	0	0	0	0	0	0	0	0	0	0	0	0
AABR07064645.1	0	0	0	0	0	0	0	0	0	0	0	0
AC127006.1	0	0	0	0	0	0	0	0.268722	0	1.12611	0.384836	0
AABR07033920.1	0	0	0	0.167405	0	0	0	0	0.199098	0	0	0
Adamts8	0.844367	0.654652	0.898643	4.10511	3.70802	3.77074	3.24197	3.69615	3.20874	3.98962	3.60903	4.04485
Rad52	6.09124	7.80611	6.09848	5.8709	5.87413	7.58086	7.25559	7.21921	7.69313	7.70258	7.53316	6.63608
Ina	0	0	0	0	0.0117589	0	0.0354437	0	0.00912295	0	0	0
AC096024.1	0	0	0	0	0	0.144101	0.282011	0.188945	0.108881	0.131966	0	0
AABR07018360.1	0	0	0	0	0	0	0	0	0	0	0	0
AABR07040840.1	11.9387	15.7747	13.1772	8.3557	7.34168	8.17992	16.1654	13.3543	12.9673	10.8694	13.1011	10.1518
Mtss1	22.1702	23.004	24.0311	20.296	16.1163	21.4091	25.0935	26.2491	25.7329	21.5388	20.5106	20.5248
Las1l	18.1237	19.6006	19.194	23.3478	24.3439	24.4236	22.6294	25.9446	24.2789	24.4288	27.0513	25.6798
AC115202.1	0	0	0	0	0	0	0	0	0	0	0	0
AABR07026305.1	5.02465	5.19426	3.49233	9.13478	1.69736	6.5356	9.37966	7.14123	6.58433	7.18226	11.4542	9.19258
Atp6v0b	52.1241	52.894	51.0276	66.7422	76.6272	65.3005	78.9295	79.305	72.3467	66.2555	72.5272	67.7425
Prl5a1	0	0	0	0	0	0	0	0	0	0	0	0
AABR07014649.1	0	0	0	0	0	0	0	0	0	0	0	0
Atp13a5	0	0	0	0.00787524	0	0.0495831	0	0	0	0	0	0
AABR07006559.1	0	0	0	0	0	0	0	0	0	0	0	0
Zap70	1.22873	1.313	1.34917	1.02978	0.922875	1.27178	1.26886	1.38963	1.22473	1.64425	1.05357	1.05224
AABR07067491.1	0	0	0	0	0	0	0	0	0	0	0	0
Ms4a6c	2.26121	1.69942	2.23551	4.67789	4.78066	5.20623	10.9893	10.971	12.0823	4.01857	4.46906	3.63385
Olr1404	0	0	0	0	0	0	0	0	0.0441039	0	0	0
Slc1a6	0	0	0	0	0	0	0	0	0	0	0	0
Ccdc152	44.2634	45.7575	47.3223	37.4242	54.9294	36.41	18.7269	19.7464	19.0121	29.8288	27.7782	31.1961
#N/A	0	0	0	0	0	0	0.233389	0.156368	0	0	0	0
AABR07030377.1	0.80572	0	0	0	1.12273	0.384269	0	0	0	0	0	0
Tppp3	40.0798	38.599	34.5015	37.6019	45.231	34.3223	28.043	27.8115	28.4157	24.5335	29.8848	30.6911
Synrg	14.1492	14.3236	14.5445	14.7229	8.55973	13.4304	19.8418	19.4875	19.7735	14.7412	16.7201	16.3391
Olr1160	0	0	0	0	0	0	0	0	0	0	0	0
AC114845.1	0	0	0	0	0	0	0	0	0	0	0	0
LOC684171	0	0	0	0	0	0	0	0	0	0	0	0
Sin3b	66.2166	64.6912	63.684	77.7683	82.8642	78.2111	77.5621	82.0271	76.5704	76.5865	74.4202	76.2633
AABR07001060.1	0	0	0.426467	0	0	0.425652	0.416509	0.558114	0.321619	0	0	0
Vac14	8.40849	9.89571	8.65148	13.9511	10.8349	13.6154	20.6648	20.0575	22.1148	15.8155	16.1537	14.6879
AABR07011127.1	0	0	0	0	0	0	0	0	0	0	0	0
AABR07072775.1	0	0	0	0	0	0	0	0	0	0	0	0
Itm2a	9.99832	9.81532	9.79579	8.63076	9.88949	7.37568	6.2102	7.19701	6.60984	6.94305	6.95711	6.32356
#N/A	0	0	0	0	0	0	0	0	0	0	0	0
Serpinb8	0.232724	0.501209	0.323505	0.93593	1.022	1.0292	4.36408	4.35276	4.11701	1.49696	1.55366	1.65826
Erich5	0	0	0	0	0	0	0	0	0	0	0	0
AABR07049753.1	0	0	0	0.116023	0	0	0	0.119727	0	0	0	0.202789
Kat14	3.58054	3.29267	3.6747	4.83128	4.48956	4.50888	6.5522	6.19882	6.05102	5.0074	4.69139	5.82879
AABR07069205.1	0.252225	0.41827	0.180785	0.152848	0.117154	0.0601465	0.117709	0.118296	0.0908923	0.110163	0.169411	0.267153
Eef1e1	6.36598	6.39532	7.5705	11.6023	13.5839	11.7107	16.4628	15.1156	14.713	13.045	12.2381	11.635
AABR07065531.28	0	0	0	0	0	0	0	0	0	0	0	0
AC124896.1	61.5636	66.7718	62.9317	42.0327	38.4178	41.4329	44.7344	48.5826	49.4017	46.4668	45.0794	45.1434
LOC100909752	25.5038	10.9458	10.5906	16.3827	6.29922	17.0064	12.9188	12.3859	9.75819	13.8665	16.6773	15.6541
Gm1141	0.0522629	0.198099	0.0499466	0.25337	0.097101	0.199404	0.292682	0.0326824	0.0753342	0.182612	0.187217	0.221424
Mrpl34	79.5504	81.0629	76.2189	72.8344	105.234	72.5844	53.6721	49.3017	48.9864	66.4719	63.0531	65.2115
Insl3	0.389995	0.461954	0.559066	0.649926	0.452866	1.11599	0.637014	1.15844	0.562158	0.340671	1.1351	0.516346
Gdf15	1.39941	1.26582	0.668693	3.5078	5.02274	3.70112	4.98715	5.80757	6.05152	4.05621	3.24705	2.96446
AABR07017733.1	0	0	0	0	0	0	0	0	0	0	0	0
Il2ra	0.455544	0.730533	0.653032	0.382236	0.309251	0.601646	0.506956	0.558788	0.61876	0.33671	0.470729	0.167021
Mtfr1	6.96577	7.37437	5.87693	4.58401	3.48826	4.77561	11.835	13.2382	11.845	7.22568	7.40791	7.32039
AABR07059002.1	0	0	0	0	0	0	0	0	0	0	0	0
AABR07005004.3	3.56996	3.38293	5.54407	5.6789	4.56001	9.36434	13.7448	7.25549	8.04048	6.62671	6.39419	8.98045
LOC100909868	0	0	0.195042	0.0927575	0	0	0	0.0957188	0	0.0445689	0.0913858	0.108083
Lcn4	0	0	0	0	0	0	0	0	0	0	0	0
AABR07058413.1	0	0	0	0	0	0	0	0	0	0	0	0
Acads	195.375	195.282	190.764	147.922	186.042	137.288	107.68	112.959	115.399	135.735	141.393	133.044
AABR07031678.1	0	0	0	0	0	0	0	0	0	0	0	0
Fancd2os	0	0	0	0.0820741	0	0	0.0421371	0.0564629	0.0325373	0.0394357	0	0.0478172
AC135285.7	0	0.509005	0.51334	1.30204	0.498991	1.53708	1.50406	0.335902	0.774268	0	0.481045	1.70681
AABR07070385.1	0	0	0	0	0	0	0	0	0	0	0	0
RGD1559482	15.5269	14.4817	15.715	50.6396	78.9342	54.7517	112.343	106.959	93.3136	56.335	57.5368	54.323
Kcnmb1	1.56507	1.77969	1.29628	2.68721	1.21158	2.43831	1.9964	1.95742	2.10556	3.32668	3.64417	2.09974
AABR07043601.2	0	0	0	0	0	0	0	0	0	0	0	0
Rn50_X_0744.5	0	0	0	0	0	0	0	0	0	0	0	0
Cuzd1	0.111669	0	0.0800396	0.0169177	0.0259341	0.133144	0	0.0174579	0.0804822	0.0243864	0.0250014	0.0295694
Parp8	5.4541	5.00253	4.62703	6.18616	4.52479	6.1483	6.96904	6.83964	6.51647	6.72607	7.13078	7.22884
Nexn	183.552	189.029	183.586	157.49	122.764	157.742	152.811	157.867	153.052	166.734	169.434	159.951
AABR07028036.1	1.02133	0.967827	1.07368	0.433249	0.569272	0.681942	0.476639	0.73449	0.846515	0.758338	0.320132	0.757247
Cebpb	32.3304	35.4802	33.1215	48.9048	78.4817	53.4717	59.5375	65.0967	60.9187	49.731	55.8605	56.9556
Nlrp4f	0	0	0	0	0	0	0	0	0	0	0	0
AABR07019911.1	0	0	0	0	0	0	0	0	0	0	0	0
AABR07004594.1	0	0	0	0	0	0	0	0	0	0	0	0
RGD1308117	1.58323	1.27382	1.51306	2.28092	1.33201	2.27949	1.81231	1.90541	2.17449	1.98316	2.14018	2.34137
Lbx2	0	0	0	0	0	0	0	0	0	0	0	0
C1qc	61.3648	64.7567	64.4435	75.8576	97.2017	73.6612	55.6861	56.879	55.7345	55.3239	52.0482	59.6976
Hpn	2.87878	3.05862	2.33435	1.956	1.82338	1.78902	1.83201	1.25471	1.94906	1.67646	1.56249	1.43218
AABR07021704.1	2.69161	2.17734	2.32136	1.56481	0.528543	1.46112	2.81862	2.47688	2.6654	1.85419	1.94015	1.92378
Ambn	0	0	0	0	0	0	0	0	0	0	0	0
Agbl5	1.71455	2.07697	2.09465	2.08874	1.01805	1.77031	1.81477	1.74645	1.87268	1.79107	2.18449	1.83474
Igf2bp3	0.951014	0.686621	0.735748	0.603756	0.126209	0.604751	1.4794	2.06733	1.37084	0.98897	1.13558	0.671532
AABR07051642.1	0	0.123534	0	0	0.121103	0	0.121677	0	0.0939561	0.113876	0	0
Esm1	2.48279	3.71881	3.36778	2.16787	2.67843	2.21543	2.8157	2.32055	2.5398	2.51858	2.51038	2.29041
AABR07036019.1	0.947062	0.881128	1.02028	1.31479	1.00776	0.656987	1.51076	1.28139	1.34032	1.2334	1.06404	1.27669
AABR07063863.1	0	0	0	0	0	0	0	0	0	0	0	0
AABR07015889.1	2.68573	4.24171	3.7645	4.12313	2.66129	4.26966	4.01083	3.47099	3.61325	2.65887	1.76383	3.60327
Mir207	0.743741	3.52388	0.710779	9.01412	5.52729	3.5471	10.4127	6.51133	8.04048	6.49677	7.32668	9.4531
Psmd3	40.0165	44.9101	43.5883	56.8507	65.0608	57.2677	59.4675	59.8823	60.7586	58.0625	60.3737	58.5546
Zfp707	3.34684	3.29835	2.89998	3.10987	3.27492	3.61804	4.08179	3.59984	3.85943	4.52175	3.47684	3.45038
Zbtb22	8.14557	8.87344	8.2374	10.5424	9.41155	10.417	11.5621	11.8526	10.8145	10.2099	10.73	10.5635
AC119462.2	2.23122	2.64291	3.1985	2.70424	0	2.66032	2.08255	4.18586	0.402024	2.92355	1.99819	8.27146
mrpl24	32.6089	28.2105	30.8854	36.1255	50.1045	36.9708	36.7202	36.3685	34.335	37.3226	35.9498	38.1238
Prrc1	13.9016	14.0448	15.449	19.1852	13.4399	16.2293	22.2528	22.9167	24.041	19.034	20.6227	19.3702
Bcam	87.0058	90.6243	85.4797	88.7061	92.261	82.8767	60.5491	61.1799	60.726	77.1502	78.5821	82.5092
Tceanc	0.646371	0.561466	0.617724	0.130567	0.400305	0.256893	0.70385	1.21262	0.737604	0.423467	0.6271	0.684626
AABR07029766.1	0	0	0	0	0	0	0	0	0	0	0	0
Stk31	0	0	0	0	0.0155754	0	0	0	0	0	0	0
AABR07058745.1	0.00586689	0.0277976	0.0224275	0.00355533	0	0.00559615	0	0.00733767	0.00422841	0.0153746	0.0210165	0.00621411
AABR07073038.2	4.24477	4.41966	4.50738	4.9541	4.96557	5.04861	5.38038	5.80046	6.04307	4.62345	6.10105	6.21667
Plekha8	2.44003	2.29569	2.50678	2.19158	1.52193	2.52693	3.05828	3.3569	2.77606	2.9155	2.73148	2.87058
AABR07065255.3	0	0	0	0	0	0	0	0	0	0	0	0
Igf2bp1	0	0	0	0	0.0256015	0	0	0.0172339	0	0	0	0
AABR07017046.3	0	0.432855	0	0.830435	0.424339	0	0	0.285649	0	0	0.409077	0
5S_rRNA	1.03593	0	0	0	0	0	0	0	0	0	0	0.548617
LOC100909792	0	0	0	0	0	0	0	0	0	0	0	0
Mir551b	0	0	0	0	0	0	0	0	0	0	0	0
AABR07012113.1	0	0	0	0	0	0	0	0	0	0	0	0
Ccdc82	2.16488	1.81796	1.90073	1.95187	1.8803	2.33359	3.35128	3.62114	3.6026	3.18255	2.39588	2.59129
Mcpt1l1	7.42012	7.61732	7.03754	7.05145	7.3108	7.82836	5.08932	5.23773	5.22631	5.94153	5.08453	5.53721
Ddc	7.53742	6.96912	7.02847	4.03396	3.97383	3.92754	4.06737	4.0197	3.89088	4.53596	4.03577	3.62226
AABR07003603.8	0	0	0	0	0	0	0	0	0	0	0	0
AABR07026300.1	3.01591	2.68979	2.7127	3.11773	1.48324	3.04595	7.12014	6.76735	5.37015	3.09938	3.01867	2.81859
AABR07011682.1	10.8423	11.4394	11.8573	9.75401	5.81483	8.95591	11.0588	12.0925	11.8423	7.71351	10.1103	12.4311
Ssr4	99.5394	103.111	95.8095	150.081	178.459	147.559	136.623	124.939	128.687	139.356	133.289	148.073
Man1a1	19.8589	19.4492	18.7553	18.4442	13.2179	17.0723	24.6806	24.6686	23.6991	19.5943	18.3647	19.0909
Arhgef2	16.4893	19.722	18.229	26.6053	16.4984	25.8145	27.1822	28.5507	28.5894	26.728	27.5329	27.6905
Chd9	6.73931	7.84038	7.34775	7.85165	1.42553	7.7864	11.2072	12.0496	12.1999	8.26385	9.10981	8.47866
RGD1306227	0.984107	0.836903	0.482303	1.42211	1.10173	1.0109	1.7193	1.60952	1.34579	1.71929	1.42367	0.77508
Rpl31	474.287	458.377	453.994	752.577	915.677	775.799	668.971	668.881	656.651	718.794	673.389	751.522
Pmvk	20.3466	20.1868	20.9172	19.316	25.6131	21.7893	17.6025	17.5075	17.3062	21.6714	19.9819	20.0316
Trmt112	76.5716	82.0744	69.5917	115.299	144.809	102.156	118.232	112.955	114.467	110.386	103.996	109.677
Rpl35al1	180.307	34.1721	24.6403	171.236	306.192	56.3318	76.0973	78.3287	41.4338	53.5662	184.721	69.9331
Myo16	0.655501	0.61114	0.586033	0.0768837	0.0785727	0.121016	0.266438	0.1719	0.274317	0.184709	0.198835	0.235165
RGD1308750	0.692927	1.36578	0.741682	1.39411	1.62214	1.69203	1.94026	6.13579	1.93771	5.20549	4.64175	3.34675
Ror2	0.426774	0.39047	0.576629	0.972071	0.587853	0.884345	1.23621	1.01231	0.965184	0.797017	1.1466	0.966413
Herpud1	59.9645	62.3142	61.1895	53.935	58.3966	51.4595	60.525	62.806	64.4635	49.2443	50.9657	53.1724
Nrbp2	22.304	28.2817	25.7467	18.0378	10.3227	19.3684	13.6547	15.5641	17.4194	20.1815	20.07	16.7655
Olr86	0	0	0	0	0	0	0	0	0	0	0	0
Suco	5.79465	5.33639	6.17742	6.59776	4.27611	6.30573	10.8628	11.0139	10.1644	7.97052	7.10441	7.0885
AABR07012317.2	0	0	0	0	0	0	0	0	0	0	0	0
Selt	53.1651	54.054	55.227	66.4693	49.2501	62.376	95.3474	99.7396	101.409	66.6329	69.6488	80.0051
Nol6	10.9112	11.8133	10.2388	14.1817	11.7643	13.1861	20.253	20.3462	20.7807	16.6688	16.1606	16.2111
Bclaf1	21.1918	20.4569	20.6999	23.1967	10.5875	23.2365	34.6858	35.5118	35.0756	26.1553	26.4763	25.9168
AABR07005508.1	0	0.0370186	0	0.0236735	0	0	0	0.0244292	0.0563104	0.0341245	0.0699701	0
LOC100911881	1.96158	0.791715	2.0135	4.997	7.18772	2.87588	0.712004	6.99652	0.471252	1.20579	2.96037	0.769507
LOC100911032	0	0	0	0	0	0	0	0.0916097	0	0	0	0
Mff	3.1669	29.8734	3.30168	11.9946	2.60763	21.2139	2.88869	18.7688	2.64558	23.3255	4.64095	19.5161
AABR07062790.1	0	0	0	0	0	0	0	0	0	0	0	0
RT1-M10-2-ps	0	0	0	0	0	0	0	0	0	0.0662416	0	0
AABR07012492.1	0	0	0	0	0	0	0	0	0	0	0	0
Zfp867	0.758325	0.99805	1.12734	0.944617	0.626185	0.683145	1.37626	0.869394	1.18417	1.25123	1.32051	0.937072
Cbfb	12.0142	12.5213	11.5008	17.2383	14.0763	15.5784	24.0131	24.9767	23.3545	18.3002	18.1173	18.3573
AABR07006049.2	0.0782886	0.074187	0.224456	0.142328	0.145455	4.40587	3.50745	0.19583	0.0564244	0.136774	0.140224	0.580454
Mss51	1.93494	2.83685	2.75634	2.38939	2.78104	3.48236	2.76013	2.80813	2.57862	4.05016	3.17144	3.2482
AABR07000332.3	0	0	0	0	0	0	0	0	0	0	0	0
Iqch	0.016052	0.045633	0.0767027	0.0486374	0.0298235	0.0153112	0.0149823	0.0200761	0.0231381	0.0140218	0	0.0680079
AABR07042699.1	0	0	0	0	0	0	0	0	0	0	0	0
Catsperd	0.167302	0.33689	0.259816	0.278807	0.271981	0.259319	0.624614	0.405407	0.301445	0.365356	0.449484	0.265805
Orm1	4.15183	3.23368	3.7504	5.51452	5.91745	5.85897	3.34432	2.56076	2.82836	5.46493	4.3294	4.87947
Hspa4l	1.46777	1.93398	1.57639	0.889466	0.870048	1.05336	1.70919	1.59096	1.65227	1.2455	1.12669	0.962394
Vom1r29	0	0	0	0	0	0	0	0	0	0	0	0
Pth	0	0	0	0	0	0	0.153824	0	0	0	0	0.0872801
Rraga	28.5155	28.9837	27.5989	29.6738	29.2233	30.7338	35.3968	36.6863	37.6216	30.8428	30.8073	34.6278
AC118419.2	0.189581	0.449122	0.724716	0.97653	0.704458	0.452081	1.41559	1.06698	0.888131	0.745218	1.35824	1.00401
Actr2	40.5388	39.2379	40.1696	60.0162	25.4288	55.3016	128.168	134.683	129.037	66.0897	69.0319	63.9839
Olr93	0	0	0	0	0	0	0	0	0	0	0	0
Olr519	0	0	0	0	0	0	0	0	0	0	0	0
Rpl10l	25.5722	25.0031	24.1798	21.6844	23.336	21.634	19.3138	18.0257	19.1469	20.9961	23.5487	21.6302
AC107411.1	0	0	0	0	0	0	0	0	0	0	0	0
Lbr	12.2065	13.0423	11.8143	13.4544	6.21931	13.9302	20.0832	21.3225	21.9039	15.1236	15.254	14.2152
Pde7b	3.27109	4.52306	3.25371	1.88114	1.02325	1.36904	3.08428	3.50668	2.8868	1.83689	2.06257	2.05053
AABR07000382.1	0.250483	0.189888	0.0478763	0.333943	7.81839	0.477847	0.140275	0.156638	0.180529	0.262564	0.583236	0.212246
AABR07001438.1	0	0	0	0	0	0	0	0	0	0	0	0
AABR07019443.1	0	0	0	0	0	0	0	0	0	0	0	0.917092
AABR07042840.1	0.0579539	0.0274588	0	0.0877999	0	0	0.027046	0.0724824	0.0417687	0.0759363	0	0
AABR07018331.1	0	0.410243	0	0.787054	0	2.06473	0.808152	0.812181	0.624037	0.37817	1.16312	0.917092
Tekt3	0.0325178	0.123257	0.09323	0.0591173	0.15104	0.0620345	0.060702	0	0.0468727	0.198836	0.0291215	0.172212
Paqr7	4.91009	5.04674	4.8911	4.36093	4.82679	4.80741	5.06787	4.61388	5.14907	4.9699	5.23483	5.66847
Grb2	22.1565	19.525	17.0901	20.2288	18.1169	18.6237	31.8285	29.6803	27.9331	22.1838	22.5821	23.2296
F10	0.217273	0.235303	0.148317	0.338572	0.317176	0.296066	0.463531	0.698763	0.738227	0.379587	0.333566	0.493139
#N/A	0	0	0	0	0	0	0	0	0	0	0	0
Morc4	1.63142	1.47946	1.54235	1.57331	1.15702	1.79039	2.39049	2.58889	2.92054	1.57832	2.12084	2.11816
Zcchc11	3.74013	3.51905	3.63774	3.86593	1.56474	3.68139	5.53346	5.58178	5.90738	3.68418	3.78897	4.10196
LOC297568	0	0	0	0	0	0	0	0	0	0	0	0
RGD1563956	0	0.0974691	0.196598	0.311658	0.477758	0.0981112	0.480019	0.192965	0.444792	0	0.18423	0.108945
Mir30d	0	0	0	0.42872	0	0	0	0.442408	0	0	0	0
RGD1566239	28.7119	28.8792	28.095	34.2049	52.4345	33.9299	21.4938	22.9798	23.3065	28.9326	30.8909	31.8643
Dtx4	5.40483	5.69074	5.85399	7.13291	2.15713	6.45381	9.41673	8.93792	9.92602	6.32998	6.3462	7.08167
LOC100294508	16.3884	17.1524	16.2985	15.6876	12.5607	15.5155	19.8371	19.2392	19.5782	17.4139	17.9383	16.8402
Gab2	7.8544	7.94243	8.23677	7.41116	1.34666	6.9137	13.5304	13.8781	13.2403	8.0122	8.09624	7.95632
AABR07010150.1	0	0	0	0	0	0	0	0	0	0	0	0
LOC100912059	1.10649	1.54782	0.151065	1.88388	1.22368	1.50776	0.885224	3.22905	3.11395	1.88707	2.50091	0.390659
Rgs14	1.24843	1.22119	1.32781	3.34345	2.74973	3.91818	7.02904	7.19001	7.16917	3.67617	4.54429	4.45749
Xk	2.332	2.65179	2.32041	1.40487	1.35078	1.50473	1.74128	2.29039	2.10585	2.08499	1.84273	1.51107
Ccdc74a	0.089249	0.338293	0.383821	0.649017	0.331637	0.255391	0.45816	0.641831	0.418105	0.506748	0.439601	0.661717
Sgo1	0.0653875	0.0743543	0.0499917	0.388323	0.182229	0.361746	0.878838	0.654237	0.584367	0.651142	0.550447	0.401693
AABR07070901.1	0	0	0	0.268359	0	0	0	0	0	0	0	0
AABR07008724.2	0	0	0	0	0	0	0	0	0	0	0	0
Ctse	1.26676	1.47321	1.62333	1.8319	1.6047	1.59276	2.09598	2.55652	2.94645	1.35804	1.65011	2.28704
Gjb6	0	0	0	0.0204628	0	0	0	0	0	0	0.0302403	0
Nr0b1	0	0	0	0	0	0	0	0	0	0	0	0
Zfp62	5.02929	5.18477	4.92963	4.80047	2.0023	4.25246	7.04984	7.17715	7.68761	5.56796	4.78448	4.85864
AABR07062730.1	0	0	0	0	0	0	0	0	0	0	0	0
Zfp560	1.30161	1.21628	1.45124	1.40226	1.04121	1.41398	1.50172	2.00097	1.60258	1.38965	1.44089	1.43608
Rbm12	0.954696	0.44347	0.0536696	0.714672	0.191288	0.214268	0.227138	0.140474	1.33567	0.24528	0.217937	0.376721
Chtopl1	5.78672	5.48355	5.80676	8.0655	7.05556	7.17558	10.8697	10.2228	9.64456	7.51908	8.6804	8.12118
AABR07014119.1	0	0	0	0	0	0	0	0	0	0	0	0
Ttc24	0	0	0	0	0	0	0	0	0	0	0	0
Abcb1a	8.20035	8.14734	7.55838	9.38486	5.96875	8.75702	11.722	11.739	11.5148	9.82483	10.0607	10.8746
AABR07067233.2	0	0.0107222	0	0	0	0	0	0	0	0	0	0
Prl8a7	0	0	0	0	0	0	0	0	0	0	0	0
Dnah11	0.723855	0.80842	0.708245	0.182773	0.148096	0.24248	0.281509	0.277523	0.26085	0.184423	0.254671	0.32402
AABR07058167.1	0	0.249875	0	0.159796	0	0	0	0	0	0	0	0
Kif18a	0.0365544	0.225155	0.192139	0.542722	0.254684	0.83682	0.784727	1.15439	1.33045	0.846177	0.769308	0.774356
Pex11g	2.11501	1.81333	2.0694	2.04461	2.33902	2.01741	1.41006	1.76349	1.30658	1.5396	1.53333	1.65347
Ddit4l	20.5702	22.3826	22.2631	10.2634	12.4781	9.90331	7.57078	8.72444	8.8859	9.57947	9.87917	11.1344
Olr1626	0	0	0	0	0	0	0	0	0	0	0	0
Ttc22	0	0.0275138	0	0.0527854	0	0.0276951	0.0135501	0.0544706	0.0523154	0.0253628	0.0260024	0.0615067
AC115134.1	0	0	0	0	0	0	0	0	0	0	0	0
Tusc2	14.7564	15.0507	15.2327	18.1407	22.3151	15.6871	16.4016	17.2934	16.298	17.81	16.6451	17.658
Synpo	16.0053	17.7468	16.6155	15.0732	3.48675	16.6023	29.2604	30.1724	31.7468	19.5021	21.5091	19.1977
Txnl4a	53.7592	48.5097	47.3892	63.0166	73.4946	62.2994	47.1064	52.2335	48.4608	58.1744	58.1326	60.5953
Rassf5	2.75538	2.89329	2.89421	4.69336	3.27451	4.85392	9.96271	8.97234	9.98299	5.20409	5.13526	4.15419
AABR07065190.1	0	0	0	0	0	0	0	0	0	0	0	0
Yeats4	36.2242	38.1451	34.9573	36.0675	44.4704	35.7353	36.3317	39.1852	36.3847	33.6543	34.2254	34.1466
Ceacam4	0	0	0.0816506	0.258874	0.0793683	0.244483	0.079744	0.213711	0.246306	0	0.0765137	0
Plpp3	52.8305	52.5801	50.0389	49.8725	35.3556	46.1332	43.2255	46.5751	46.3731	45.6715	45.9459	46.7973
C2cd4d	1.01775	0.803693	0.540358	0.822341	0.472729	0.269662	0.422193	0.530372	0.489011	0.790251	0.455727	0.359328
Cpsf4	18.1215	18.2272	18.6759	26.4536	28.4613	24.9025	24.4751	24.1769	23.8798	25.1865	27.8847	25.9037
AC109547.1	0	0	0	0	0	0	0.47917	0.321039	0.740009	0.8969	0.45976	0.543762
Traf7	16.8822	18.9619	16.8336	25.7177	21.6595	27.1489	28.5329	29.9792	29.691	26.4711	29.3042	27.4212
AABR07018028.1	0	0	0	0	0	0	0	0	0	0	0	0
Krtap9-1	0	0	0	0	0	0	0	0	0	0	0	0
AABR07013425.1	0	0	0	0	0	0	0	0	0	0	0	0
Ier5	23.069	22.6641	21.1955	51.8589	55.9395	48.6606	58.4209	54.6018	55.3805	49.8229	55.3708	53.4501
Lhx3	0	0	0	0.0874504	0	0.0458829	0	0.150404	0	0.126057	0.129236	0
Polr3h	10.1641	9.90415	9.0263	17.1417	16.4345	17.3321	17.4521	19.4579	19.5922	15.7469	16.2299	16.5546
LOC103690343	2.86843	2.70168	2.67485	3.35011	2.18019	3.44909	3.50482	4.0876	3.5834	2.70306	2.89578	2.92771
Spata9	5.43161	3.55518	3.96005	2.78254	1.30046	2.51036	3.71079	4.23704	3.06718	2.73918	3.66077	2.90619
AC117905.1	0.298645	0.0707498	0.214057	0.0452446	0.0693579	0.0712159	0.0696862	0.0933782	0	0.130437	0.0668634	0.07908
Degs1	28.6628	28.5001	28.0869	39.2161	33.1147	37.6985	48.2681	47.764	47.0186	38.6144	40.3475	40.6214
Rn50_2_2281.5	0	0	0	0	0	0	0	0	0	0	0	0
RGD1304963	9.16674	9.54258	8.80651	7.62813	5.19216	7.11217	8.20738	8.72285	8.62949	7.84955	8.22011	7.10651
Krtap3-3	0	0	0	0	0	0	0	0	0	0	0	0
Rnf208	0.204087	0.0483488	0.146282	0.123677	0.284386	0.146002	0.190488	0.127625	0.183863	0.133707	0.274157	0
Hcrtr2	0	0	0	0	0	0	0	0	0	0	0	0
AABR07073073.1	0	1.5061	1.51892	0.963153	0.738234	3.79005	2.96691	0.496951	1.14549	0.694176	2.84673	2.52514
AC119462.3	0	0	0	0	0	0	0	0	0	0	0	0
AABR07029563.1	0	0	0	0	0	0	0	0	0	0	0	0
Pkd2	10.2726	10.097	9.87442	11.9648	5.8768	10.4601	14.0751	13.6405	13.2559	11.6685	12.9052	12.9198
#N/A	9.3407	9.60145	9.01317	7.14066	4.28607	7.29167	8.42274	7.89193	9.29122	8.21861	8.20308	7.37821
Osbpl9	24.63	25.7018	24.5483	38.1928	29.7017	36.1575	45.8004	44.7326	44.7983	42.9588	42.9017	42.4749
RGD1566265	5.48441	4.48024	3.97619	5.98811	5.09483	4.73525	8.25211	9.78633	7.59881	6.27757	6.3512	7.26124
AABR07013701.1	1.93373	1.30887	1.05601	5.69177	10.7782	5.53347	2.06271	3.80049	5.97293	5.5501	3.21613	2.92596
Sema6a	13.9597	13.8327	15.0566	15.1585	2.69894	13.5183	15.6971	14.8153	15.1171	15.5986	16.1401	15.9117
AC115277.1	0	0	0	0	0	0	0	0	0	0	0	0
AABR07067191.1	0	0	0	0	0	0	0	0	0	0	0	0
Cdhr1	0.176493	0.102921	0.19462	0.123409	0.050448	0.0647493	0.240762	0.161308	0.234835	0.16603	0.158059	0.215698
Myef2	12.5171	13.2869	13.7739	15.3348	9.25204	16.3019	22.1022	22.0901	21.3606	19.555	20.5871	18.7395
AABR07069230.3	0	0	0	0	0	0	0	0	0	0	0	0
Rn50_X_0616.3	0	0	0	0	0	0	0	0	0	0	0	0
AABR07034721.1	0	0	0	0	0	0	0	0	0	0	0	0
Eif2b1	18.5105	14.9292	18.3925	28.1129	26.4548	25.8054	29.6668	29.1253	27.973	29.45	26.9019	26.8062
Tubb5	129.861	129.076	120.105	320.266	318.6	316.339	374.586	371.871	377.215	346.542	359.348	356.683
AABR07005888.1	1.07429	0	0	0	0	0	0	0	0	0	0	0
Elp5	16.6063	13.9607	14.5361	21.6853	22.867	23.4095	23.2496	23.8939	24.7315	21.8553	24.4465	22.9982
AABR07035802.1	0.0540903	0.102513	0	0.114725	0.025124	0.0257971	0.227187	0.169126	0.136444	0.141748	0.0968817	0.0286458
LOC102551356	1.62184	1.65509	1.5738	0.801385	0.927158	1.0472	0.605506	0.811366	0.647388	0.69746	0.737395	0.713557
Kif7	1.19597	1.37909	1.34953	1.92977	0.923617	1.89672	2.08461	1.85622	2.27434	1.7244	2.21954	1.8925
AC096030.1	0.492669	0.817002	0.470834	0.485155	0	0.0587418	0.5748	0.154044	0.443848	0.376565	0.386061	0.326142
Ndufaf6	18.5404	19.5827	18.0741	19.2516	22.3559	17.7355	17.1066	16.7766	16.6553	23.0171	20.7431	20.8193
Cxcl2	0.324693	0.307682	0.155151	1.18058	2.16167	1.65178	6.16216	8.76479	8.4635	2.50538	2.61703	2.57932
AABR07027857.1	0	0	0	0	0	0	0	0	0	0	0	0
Ndufs2	460.954	450.933	469.228	392.656	436.427	386.276	294.182	307.466	293.064	371.153	365.189	369.283
Mir433	0	0	0	0	0	0	0	0	0	0	0	0
Ptpn5	0.128264	0.190998	0.157602	0.388638	0.170218	0.471901	0.461765	0.481255	0.330152	0.51219	0.541517	0.44638
MGC114492	0	0	0	0	0	0	0	0	0	0	0	0
5S_rRNA	0	0	0	0	0	0	0	0	0	0	0	0
F8	13.4618	14.1754	13.4908	14.3363	3.95287	15.2851	13.5203	13.714	13.9485	14.4055	16.4403	15.2027
Klra5	0	0	0	0	0	0	0	0	0	0	0	0
Best4	0	0	0	0	0	0.0405383	0	0.0265769	0	0.111373	0	0
AABR07005664.2	0	0	0	0	0	0	0	0	0	0	0	0
Ankrd33b	1.97387	1.74365	1.47075	1.74356	1.3364	1.75514	3.09139	2.88713	2.62823	1.63656	1.76771	1.91352
AABR07036974.1	0	0.347928	0.116964	0.2225	0.227388	0.11674	0.228465	0.0765347	0	0	0.21921	0
AABR07014487.1	0	0	0	0	0	0	0	0.0800826	0	0.111865	0	0
Hcn3	0	0.00857205	0	0	0	0.00862853	0.00844319	0.0282843	0.0260786	0.0158038	0.00810117	0.00958134
AABR07054460.3	1.87135	0	0	0	0	0	0	0	0	0	0	0
Acad10	14.4229	16.1885	16.4602	9.50399	9.29156	8.8154	9.26087	9.59475	9.63083	10.3447	9.35151	9.21677
Dpf1	0.0740892	0.257428	0.0236019	0.583673	0.665322	0.494691	0.62237	0.69497	0.676372	0.647188	0.685627	0.706266
Trmu	7.08709	6.64656	6.49369	7.77042	6.95697	7.77056	6.58074	6.85342	7.00352	7.33955	7.72095	8.08693
Cops6	44.0158	47.5679	47.6422	58.412	68.6387	52.0798	61.3011	57.1532	59.0266	58.451	52.7058	59.507
AABR07054315.1	0	0	0	0	0	0	0	0	0	0	0	0
AABR07065531.12	0	0	0	0	0	0	0	0	0	0	0	0
Lin37	9.88177	12.9995	10.4993	15.9572	21.4376	15.9129	14.6488	14.6128	13.6994	15.8422	15.6691	15.2689
Muc20	0	0	0	0.0671325	0.0686073	0	0.0344661	0	0.0266139	0	0.16535	0.0391121
Tcf3	13.1776	15.6859	13.4208	18.4364	17.8498	18.8852	17.5102	18.5649	17.8408	17.0491	19.2425	18.4954
AABR07017639.2	0	0	0.362358	0	0	0	0	0	0	0	0	0
LOC100912374	0	0	0	0	0	0	0	0	0	0	0	0
AABR07030184.1	0	0	0	0	0	0	0	0	0	0	0	0
Gltscr2	73.5951	76.349	74.2678	83.8155	97.7625	79.4808	77.7419	75.789	75.0382	72.1633	72.3988	75.3199
AABR07001064.1	2.62937	2.21695	2.15669	2.63475	2.46183	2.48829	3.69091	3.54747	3.52151	2.27874	2.41037	3.17971
#N/A	0	0	0	0.256606	0	0	0	0	0	0	0	0
Pqlc1	15.6629	16.5537	15.802	20.1533	21.6953	18.0885	17.0315	18.6547	17.7296	18.6597	19.437	21.1414
Rps21	1016.62	1064.37	1008.53	1521.96	2148.85	1484.14	1271.11	1231.81	1224.23	1429.81	1284.67	1540.13
AABR07027815.1	1.84165	1.74516	1.76002	0.558017	1.71083	0.878329	1.71893	0.575832	0.663658	0	0.824648	0.97532
AABR07050402.1	1.6265	0.513762	0.518138	0.328552	0	1.55144	1.51812	0.339041	0	0	0.971081	0
AABR07065044.1	0	0.32054	0.161635	0	0	0.161326	0.315721	0	0.121896	0.29548	0	0
Srd5a1	0.789422	0.808718	0.509753	0.775765	0.832447	0.610534	1.15501	0.97398	1.04565	0.708218	0.878937	0.994331
AABR07042821.1	31.4614	25.8866	15.6935	51.8026	56.0296	48.7473	24.2082	19.9622	24.9978	34.7216	39.4457	44.2145
#N/A	0	0	0.426467	0	0	0.212826	0.208255	0.279057	0.16081	0	0	0
AABR07072668.1	0	0	0	0	0	0	0	0	0	0	0	0
Rasl11b	13.4992	15.2485	13.3239	20.4608	21.8501	20.1135	20.3601	20.6594	21.5318	23.5562	24.6882	22.4015
Padi3	0	0.0177388	0.0357798	0.022688	0	0.0357114	0.0524164	0.0468247	0.067458	0.065408	0.100586	0.0991371
RGD1560398	7.41704	7.78151	8.35409	8.66838	7.13626	10.6121	7.17004	9.27642	7.06387	5.55341	6.8796	8.13657
Ldlrad1	1.02924	0.886655	0.655751	1.00173	1.15895	1.57674	0.902437	1.05322	1.1689	0.926314	1.00554	1.3214
Nrde2	2.42122	3.23368	2.56239	2.7868	0.890636	2.89849	4.06476	3.83098	3.73601	2.69698	2.7941	2.82269
AABR07037523.2	0.966864	0.91621	0	0	0	0	0	0	0	0	0	0
AABR07030351.1	0.623783	0.886655	0.447103	0.66152	0	0.446248	0.291109	0.09752	0.337181	0	0.558633	0.495525
Aox2	0.0398889	0.0251994	0	0.00805755	0.0247037	0	0.0248206	0.0332592	0.0191659	0	0.0119076	0.0140832
AABR07025552.1	0	0	0	0	0	0	0	0	0	0	0	0
Haao	0.324347	0.0878156	0.354254	0.365029	0.301308	0.30938	0.562221	0.550536	0.534319	0.1619	0.248975	0.588931
Faim	0.803627	0.618739	0.76801	0.700058	0.933178	0.766542	0.375039	0.439726	2.42537	0.965235	1.07954	0.478793
#N/A	0	0	0	0	0	0	0	0	0	0	0	0
1700034I23Rik	0.175793	0.416459	0.0840011	0.159796	0.244959	0.419203	0.328159	0.384761	0.0633492	0.3839	0.157433	0.74479
Cmtm4	4.2526	2.96533	4.21748	2.57707	0.670843	4.13288	5.4296	5.29359	5.08897	3.60962	3.73658	3.86688
Vom1r89	0	0	0	0	0	0	0	0	0	0	0	0
Unc119	46.9986	47.5856	48.2508	42.7903	50.565	43.4896	35.1527	38.0063	38.6094	43.3112	43.8352	43.8757
AABR07031485.2	0	0	0.264004	0.33481	0	0	0.515678	0.17275	0	0.241309	0	0
AABR07058124.3	2.60309	3.34769	2.84312	3.04227	1.55455	2.48297	5.03282	5.11605	3.88623	2.43629	1.83167	2.75715
Fuca1	21.9721	23.4277	20.8984	35.7881	42.5694	33.0481	40.3334	40.5671	38.7236	30.995	32.6186	34.7427
Arvcf	8.08463	9.44476	9.00912	8.03144	6.46406	8.09418	7.63231	7.23619	7.65043	9.51501	8.87067	8.64481
AABR07051827.1	0	0	0	0	0	0	0	0	0	0	0	0
Atp5f1	15.2411	18.9039	27.9873	25.0002	13.1948	9.13366	25.6952	27.6946	28.4104	15.2652	14.6497	15.805
Tie1	65.5546	70.0745	65.3755	88.1321	57.1795	85.1961	69.7878	70.0423	69.0347	88.9289	90.9308	92.6265
Dlk1	1.07669	0.612167	0.823174	0.809063	0.560115	0.49296	0.602964	0.484776	0.403516	0.413826	0.578539	0.775477
Ccdc127	15.6239	16.0318	17.0961	12.4653	7.64351	11.9488	18.9404	21.3618	19.7892	16.3532	13.9093	14.3943
Akr1b1-ps2	1.16514	1.04599	1.40653	0.81756	0.683607	0.994387	1.37369	1.49558	1.23752	1.12492	1.20821	0.974289
AABR07068163.1	0	0	0	0	0	0	0	0	0	0	0	0
AABR07040797.1	0	0	0	0	0	0	0	0	0	0	0	0
LOC498759	0	0	0	0	0.0619437	0	0	0	0	0	0	0
Dhrs1	9.07569	9.32263	10.0265	12.3857	10.5894	12.9161	11.8932	11.7595	11.7478	12.7797	13.6872	11.7661
Atp7b	0.0376884	0.0892847	0.135068	0.0970662	0.0437641	0.0539237	0.0879425	0.117841	0.129024	0.0658435	0.0421901	0.0798378
Prkag3	2.24262	2.46595	2.38585	1.64108	1.43474	1.81624	1.54026	1.71994	1.43333	1.86658	1.91365	2.19607
Scamp5	1.7071	2.28704	2.02523	2.3187	1.25773	2.58285	3.81853	4.43575	4.36984	2.15966	1.89782	2.0887
AABR07026596.3	0	0	0	0	0	0	0	0	0.158975	0	0	0
AABR07005543.1	0	0	0	0	0	0	0	0	0	0	0	0
AABR07027096.1	0	0	0	0	0	0	0	0	0	0	0	0
Trdmt1	3.73528	3.51236	3.15784	3.32572	2.02859	3.09699	4.18366	4.59981	3.87249	3.21267	3.7054	3.62158
Cyhr1	51.7635	49.7578	51.3046	41.9638	38.2083	38.4937	42.6963	42.2101	42.8847	40.3596	41.5315	40.923
Efr3b	2.02849	1.6416	1.89614	1.82146	0.426397	2.10436	2.14208	2.35183	2.39039	2.17289	2.47963	2.52493
Gimap4	28.5108	26.8998	29.7708	37.7304	39.0193	38.5297	29.6918	30.8332	28.1611	37.4475	35.0663	38.7201
Zfp354b	0.376269	0.398504	0.634576	0.684055	0.431786	0.380017	0.309879	0.456755	0.446659	0.46402	0.475722	0.351651
AABR07071904.1	0.0166653	0.0473765	0.0159267	0.0100991	0.0154815	0.0476887	0.0311096	0.0208431	0.0120111	0.0727878	0.0447741	0.0353032
42989	18.4385	19.6934	17.5024	30.2029	12.4853	27.9542	51.5521	52.1399	52.1099	29.4773	32.431	32.1615
Cntnap5c	0.060429	0.0143158	0	0	0	0	0.0141006	0.0283417	0	0	0	0
Fam24a	0.101597	0.0962742	0	0.184703	0.0943801	0.290725	0	0.127066	0.146447	0.0887475	0.0909857	0.10761
Por	36.4537	37.182	36.0206	46.6187	44.9829	44.1452	56.5448	58.4337	57.1593	48.0767	49.5662	47.3314
Rps2-ps2	0.0970097	0.183855	0	0	0	0	0.0905455	0.121329	0.209752	0.593184	0.0868776	0.205502
Rnf10	47.2867	49.6228	46.5702	50.9577	38.8147	50.3546	56.4705	56.9113	57.831	55.0749	58.4153	55.9451
Olr1202	0	0	0	0	0	0	0	0	0	0	0	0
AC129036.2	0	0	0	0	0	0	0	0	0	0	0	0
Prok1	0.182427	0	0.174342	0.110551	0.169469	0	0	0.5704	0.525918	0.159355	0	0.193224
Pabpc1	56.7948	60.6428	60.19	125.132	108.583	120.537	190.198	192.851	194.031	135.148	136.353	140.454
Arhgap32	1.7459	1.9311	1.77455	1.71971	0.602104	1.51495	1.65136	1.74541	2.07474	1.69851	1.85116	1.85541
#N/A	0	0	0	0	0	0	0	0	0	0	0	0
RGD1307554	17.7087	18.2265	17.574	19.8762	18.7106	20.2147	25.3413	22.8829	25.4964	21.3576	24.1671	19.914
AABR07054290.1	0	0	0	0	0	0	0	0	0	0	0	0
Tle2	4.98202	5.19766	5.17325	5.09473	3.82711	5.36898	2.88392	2.93575	3.27993	5.04238	5.14809	4.21135
AABR07025116.1	0	0	0	0	0	0	0	0	0	0	0	0
Olr1234	0	0	0	0	0	0	0	0	0	0	0	0
Tuba4a	138.539	144.037	140.669	174.659	219.807	176.704	142.396	155.206	153.353	202.349	203.757	197.702
Adss	10.0076	10.0895	10.1536	20.686	19.6971	20.2465	34.6757	33.3341	32.0454	23.5112	22.8355	22.8211
AABR07067812.2	0	0	0	0	0	0	0	0	0	0	0	0
Nup37	4.80466	5.53098	4.82981	6.49183	7.70345	6.72164	8.969	8.85792	8.77251	8.51835	6.69331	8.85866
Cog1	10.308	11.6408	10.9067	12.5051	7.34387	11.8654	12.6956	12.2379	11.5907	12.7957	13.0489	12.7241
Slc44a5	0.0907002	0.171897	0.156025	0.131914	0.185366	0.224938	0.101588	0.136125	0.130739	0.0475374	0.194945	0.153709
#N/A	0	0	0	0	0	0	0	0	0	0	0	0
Sec62	32.8989	33.5944	33.7585	36.0639	26.738	31.8677	47.9512	47.6515	45.0072	40.0549	37.8073	38.0906
Ttc38	5.00801	5.01995	5.11803	3.80671	2.62195	3.56197	3.02613	3.49378	4.09968	3.5528	3.87572	2.97414
Fscb	0	0	0	0	0	0	0	0	0	0	0	0.0879988
Rn60_14_0082.2	0	0	0	0	0	0	0	0	0	0	0	0
AABR07066826.1	2.94663	4.01387	4.31206	3.1807	0.256624	2.98632	7.21949	6.44932	5.17654	3.86094	2.39148	3.12102
AABR07017786.1	0	0	0	0	0	0	0	0	0	0	0	0
AABR07024624.1	0	0	0	0	0	0	0	0	0	0	0	0
AC109096.1	112.201	105.897	96.699	158.743	226.008	138.766	120.675	120.362	119.922	139.061	132.903	145.277
AABR07051312.1	0	0	0	0	0	0	0	0	0	0	0	0
AABR07030890.1	0.102767	0	0	0	0.0477334	0.0980243	0.0959188	0.128529	0.0740664	0.0448847	0.230083	0.0544244
Sumo4	9.10447	11.2821	9.31449	11.7419	11.8734	12.3028	19.229	19.1971	21.1576	13.0511	12.3349	13.4759
Jkamp	14.5528	14.206	15.3558	16.2124	13.0746	15.1743	19.7978	18.1512	20.546	15.2895	16.5678	16.7654
AC144660.2	0	0	0	0	0	0	0	0	0	0	0	0
Rab23	4.58809	5.339	4.98107	7.52926	4.12579	7.3698	10.5517	10.9142	10.0657	9.15385	9.43402	8.82509
LOC100909998	0.307022	0.23275	0.293415	0.390715	0.0713033	0.395353	0.429845	0.38399	0.3983	0.362059	0.233712	0.520308
AABR07053306.1	0	0	0	0	0	0	0	0	0	0	0	0
AABR07032521.1	0	0	0	0	0	0	0	0	0	0	0	0
AC118350.1	0	0	0	0	0	0	0.189987	0	0	0	0	0
Olr372	0	0	0	0	0	0	0	0	0	0	0	0
rno-mir-503-1	0	0	0	0	0	0	0	0	0	0	0	0
Urb2	1.25095	1.02254	1.28677	1.41778	0.851612	1.52114	2.44215	2.45432	2.49142	1.50148	1.38541	1.56774
AABR07007457.1	0	0	0	0	0	0	0	0	0	0	0	0
AABR07031784.1	0	0	0	0	0	0	0	0	0	0	0	0
AC109542.4	0	0.820486	0.413737	0.787054	0.402172	0.412946	0	0.270727	0	0	0	0.458546
Ggnbp1	1.20512	1.2995	1.7077	1.51096	2.35484	1.42697	0.969667	1.35131	1.34776	1.7061	1.15368	1.40848
Mrpl16	57.6079	53.4894	55.4407	41.7945	55.4388	41.802	36.9928	37.0352	38.6811	40.1782	41.1463	39.4661
AABR07053169.1	0	0	0	0	0.213853	0	0	0.575832	0.165915	0	0.412324	0
AABR07053866.1	0	0	0	0	0	0	0	0	0	0	0	0
Slc25a32	5.45432	5.24002	5.42877	6.10797	5.18363	5.44237	7.31959	8.25201	7.40922	6.82837	5.85257	5.83037
Rap2b	5.35979	4.08311	4.92137	8.6614	4.68618	5.81416	16.6755	17.2844	16.2091	7.52778	9.6941	7.68064
Sharpin	20.0565	21.4192	22.1087	22.0791	22.9037	22.8087	21.8566	19.4217	21.5426	21.4132	22.6818	21.6557
Ccser1	0.176007	0.166786	0.353233	0.234652	0.0490513	0.21825	0.22999	0.275163	0.31713	0.292118	0.346773	0.260993
Olr263	0	0	0	0	0	0	0	0	0	0	0	0
Gabrd	0	0	0	0.0196068	0	0	0	0.0809312	0	0	0	0
Vom2r4	0	0	0	0	0	0	0	0	0	0	0	0
Gria3	5.69738	6.03278	5.85269	4.64774	3.73916	5.07143	5.97438	5.98614	5.9848	4.95666	5.0197	4.56869
Clstn1	40.701	44.7939	39.6439	41.6323	30.7843	40.6293	39.633	39.0189	40.0159	41.7662	42.3807	42.5627
Cercam	4.64002	5.22819	4.52262	7.79203	7.11971	7.50861	6.27001	7.33344	7.27066	7.72322	6.8223	7.26192
AABR07017624.2	0	0	0	0	0	0	0	0.107013	0	0	0	0
Cers3	0	0	0	0	0.0273143	0	0	0	0	0	0	0
AABR07062912.1	0	0	0	0	0	0	0	0	0	0	0	0
Mybph	1.50591	1.36215	1.30834	2.30219	2.57532	2.3505	2.0764	2.56831	2.41736	2.48142	2.72791	2.2113
LOC100911047	0	0	0	0	0	0.163955	0	0	0	0	0	0
5S_rRNA	0	0	0	0	0	0	0.45501	0	0	0.425839	0	0
AABR07028137.1	0	0	0	0	0	0	0	0	0	0	0	0
AABR07037715.1	0	0	0	0	0	0	0	0	0	0	0	0
Bag6	47.4304	51.7119	49.2961	47.1769	31.8004	47.5222	51.8844	51.5925	54.0823	51.4228	53.1392	50.9562
Rn60_6_1137.1	0	0	0	0	0	0	0	0	0	0	0	0
Lrfn1	0.345823	0.355014	0.247872	0.34928	0.428344	0.522285	0.484169	0.666798	0.602337	0.402781	0.593599	0.702056
Olr218	0	0	0	0	0	0	0	0	0	0	0	0
Adam21	0	0	0	0	0	0	0	0	0	0	0	0
LOC100363136	0	0	0	0.0665816	0	0.209601	0	0.137414	0	0	0.0983955	0
Higd2al1	1.08433	0.856271	0.345425	0.438069	1.67885	0.861912	0.16868	0.113014	0.521003	0.789328	0.48554	0.382836
#N/A	0	0	0	0	0	0	0	0	0	0	0	0
AABR07067246.1	0	0	0	0	0	0	0	0	0	0	0	0
Tdrp	0.970716	0.985564	0.883518	1.66671	1.86794	1.43297	1.29433	1.44532	1.48252	1.8574	1.57307	1.93393
Tmem89	0.204267	0.0967827	0.195214	0.309464	0.379514	0.389681	0.0953278	0.0638687	0	0.178433	0.457331	0.108178
#N/A	0	0	0	0	0	0	0	0	0	0	0	0
Zscan18	0.158502	0.090119	0.151477	0.172894	0	0.211663	0.14794	0.47577	0.525487	0.138456	0.283895	0.470072
Tmem218	8.87613	9.48395	8.52602	4.77516	5.04834	5.0108	5.83308	4.70106	5.4507	5.97338	4.98844	5.27632
Chchd7	43.1716	44.1059	41.0433	53.2777	73.9435	52.5466	31.9001	34.1683	29.3322	45.3717	37.6557	48.3464
Olr1553	0	0	0	0	0	0	0	0	0	0	0	0
Snw1	8.51386	8.35855	8.6985	10.0244	8.45536	10.1207	14.1033	13.2063	13.5621	11.1444	11.2652	11.1571
Tbx20	16.2486	17.9374	15.6866	6.29703	0.645586	6.34471	21.7758	20.7359	21.7281	8.26754	9.5726	8.97317
Tmod1	66.9719	67.0154	66.9745	50.7241	38.8364	47.0062	56.8343	55.4882	56.0109	54.9077	55.3508	53.0201
Kir3dl1	0.225376	0.298996	0.215388	0.163893	0	0.0859903	0.168287	0.253688	0.162434	0.118123	0.201837	0.0477429
Rn50_X_0718.1	0	0	0	0	0	0	0	0	0	0	0	0
Rnf128	10.8923	11.1882	10.5895	8.13277	9.21919	8.05522	7.9324	8.2915	8.37373	8.71598	8.79128	8.31803
Ets1	42.2491	44.3955	43.7157	47.6281	28.8469	45.8428	50.2179	50.1365	50.0047	44.2184	44.59	45.2747
AABR07003601.12	0	0	0	0	0	0	0	0	0	0	0	0
Hsf2bp	0.163337	0.23217	0.286179	0.824849	0.606938	0.545298	0.787673	0.646899	0.667084	0.713395	0.707007	0.663181
AABR07045369.1	0.442838	1.25891	0.423212	0	0	0	0	0.553854	0.319164	0.386831	0	0
AABR07036167.1	0	0	0	0	0	0	0	0	0	0	0	0
AABR07058633.1	0	0	0	0	0	0	0	0	0	0	0	0
Mfn1	60.0166	59.0801	59.1172	43.714	39.4619	43.3099	55.5622	55.0938	54.7624	49.7913	47.1813	48.2264
Olr1243	0	0	0	0	0	0	0	0	0	0	0	0
Nuf2	0.5218	0.756237	0.557341	2.43667	3.05098	2.54715	3.78164	4.1268	3.71649	3.21745	3.13366	3.28358
AABR07028795.1	0	0.488645	0.492807	0.468734	0	0	1.4439	0.161233	0.743297	0	1.15451	0.27309
AABR07031689.1	0	0	0	0	0	0	0	0	0	0	0	0
Csrp3	795.004	746.913	796.173	1732.79	2271.43	1625.63	1589.08	1175.1	1274.06	1940.87	1876.93	1913.71
Mrpl1	6.65068	5.82561	11.9107	4.23351	4.30921	4.85112	7.0943	11.3236	4.14882	3.51502	5.7058	6.80751
LOC100912491	0	0	0	0	0	0	0	0	0	0	0	0
AABR07061688.1	0	0	0	0	0	0	0	0	0	0	0	0
AABR07015780.1	0	0	0	0	0	0	0	0	0	0	0	0
Olr537	0	0	0	0	0	0	0	0	0	0	0	0
Nlgn2	5.795	6.15583	6.64185	7.28596	2.52884	7.55369	8.14214	6.92534	7.77351	7.51205	8.75423	9.02128
Camkmt	1.19553	1.56448	1.25136	1.24199	2.90874	1.14036	2.39115	1.95806	2.50288	2.13839	2.2433	2.41198
AC142178.1	1.4503	3.66484	0.924012	1.17184	0	2.30561	0.451218	0.302312	0	2.11145	0.43294	1.53613
AABR07007078.1	0	0	0	0	0	0	0	0	0	0	0	0
AC096404.1	0.151072	0.572631	0	0.0915497	0.280683	0	0.141006	0	0	0.131966	0.135294	0.320027
AABR07031963.1	0.111134	0	0.177014	0.0448979	0.0344132	0.0353351	0.0691522	0.069497	0.0266989	0.0970782	0.0995265	0.078474
Itgb1	121.685	121.096	120.354	228.393	195.175	219.372	305.856	308.725	300.857	266.784	268.3	259.941
Asic1	2.18658	2.25109	1.98648	2.40474	1.50464	1.64794	0.856664	0.962221	0.87551	2.00436	1.37799	1.28666
AABR07065815.1	0	0	0	0	0	0.156313	0.458866	0.204957	0	0.286299	0	0
Kcna5	6.6061	6.95894	7.0182	4.08102	2.41303	3.91534	4.07069	4.6926	3.62866	6.19079	6.05973	6.28378
AABR07016650.1	0	0	0	0	0	0	0	0	0	0	0	0
Rn50_X_0641.4	0	0	0	0	0	0	0	0	0	0	0	0
Agfg1	18.6373	19.4297	18.8984	26.1763	13.6015	26.3459	47.4494	47.8045	47.2339	27.8724	34.0083	31.0161
Men1	6.93493	7.47612	6.57172	9.40853	6.67757	9.51356	8.96376	9.09981	9.12586	8.38909	9.59505	8.7484
Ahcyl1	31.4714	31.5021	32.9213	40.2225	30.1435	37.8435	53.9341	51.4818	52.7831	42.894	43.3652	39.8563
Lrrc26	0	0	0	0	0	0	0	0	0	0	0	0
AABR07016051.1	0	0	0	0	0	0	0	0	0	0	0	0
AABR07007710.1	0	0	0	0	0	0	0	0	0	0	0	0
AABR07062425.1	0	0	0	0	0	0	0	0	0	0	0	0
Trim63	51.4947	52.5081	51.5809	35.9895	34.023	38.3199	29.8147	31.3027	31.2255	38.7545	35.238	35.7458
Rbm33	9.69453	10.2025	9.75484	8.35098	0.678329	8.13572	12.1372	12.6203	13.3359	9.77126	9.60028	10.1037
Olr635	0	0.118221	0	0	0	0	0	0	0	0	0	0
Aco1	16.4241	16.5949	14.6882	13.9606	11.8358	13.6221	19.9083	19.4527	20.127	15.005	15.4134	14.7185
Gns	1.86182	4.83075	0.466007	4.62048	0.178447	3.52361	6.33039	0.665302	6.17679	3.04617	0.741049	1.73724
#N/A	0	0	0	0	0	0	0	0	0	0	0	0
Bend4	0.0356119	0.202477	0.0680672	0.194227	0	0.0679371	0.166195	0.244967	0.205331	0.15554	0.159462	0.113159
AABR07060293.1	0.458592	0.289711	0.584356	0.277906	0.213008	0.0729048	0.142678	0.238982	0.44069	0.400592	0.342245	0
Mark1	1.1973	1.13458	1.36368	1.54058	1.18844	1.64268	1.71455	1.77438	1.9268	1.54732	1.48353	1.23342
AABR07001700.2	0	0	0	0	0	0	0	0	0	0	0	0
Mt-nd4	2633.31	2130.65	1924.86	1344.8	1482.71	1584.47	1831.3	1281.29	1124.09	1585.85	1486.54	1397.94
AABR07059876.1	0.412406	0.130267	0.131376	0	0	0.131125	0.128309	0.0859655	0	0.48033	0.615555	0
Htatsf1	13.8429	13.3088	13.4572	14.0665	11.9228	14.5857	17.4555	17.9553	17.4431	15.0071	14.2361	15.4778
AABR07051882.1	0	0	0	0	0	0	0	0	0	0	0	0
AABR07068071.1	0	0	0	0	0	0	0	0	0	0	0	0
AABR07065933.1	0	0	0	0	0	0	0.0666825	0	0	0	0	0
AABR07037528.1	3.77927	3.84987	4.28898	2.54788	0.0438852	2.25304	6.12893	6.73555	6.435	3.54889	5.5422	4.05298
Tpgs1	13.798	14.3933	14.5518	19.4344	25.9501	18.5047	15.1946	14.1771	15.7433	16.6836	18.1818	18.2384
Slc17a4	0.052122	0	0	0.0315859	0.0242098	0	0	0.0162971	0	0	0	0
Osbpl1a	16.0349	16.9675	16.6377	16.1026	9.7887	15.2767	16.2848	17.4284	15.8767	14.4904	17.1979	14.9215
AABR07017714.2	0	0	0	0	0	0	0	0	0	0	0	0
Tas1r1	0.551327	0.69659	0.409805	0.321729	0.284536	0.272681	0.266824	0.293693	0.264903	0.606457	0.347449	0.21628
Mrgbp	0.0943282	0.178773	5.31871	0.0571627	0	0.449876	1.2326	0	0.0679845	2.38955	0.253428	0.0999108
AABR07051452.1	0.446245	2.11433	4.26467	2.97466	2.90183	5.95913	6.66415	5.8602	4.50267	2.72865	5.59492	2.83593
AABR07029329.1	0	0	0	0	0	0	0	0	0	0	0	0
AABR07017676.1	0	0.321477	0	0	0	0	0	0	0	0	0	0.179664
Tnfsf9	0.711802	0.716667	1.02038	3.20817	2.52098	2.92799	4.44298	4.17302	3.78346	2.56483	3.62554	1.8377
Lmntd2	0	0	0.0190846	0.0605079	0	0	0	0.0499517	0.0287852	0.017444	0.0715357	0.0211515
LOC103689958	0	0	0	0	0	0	0	0	0	0	0	0
Nsf	5.4023	5.22937	5.29241	7.33375	4.02924	7.36935	10.2834	11.3095	10.955	9.31971	8.82643	8.53177
AABR07055848.1	0	0	0	0	0	0	0	0	0	0	0	0
Olr298	0	0	0.0607903	0	0	0	0	0	0	0	0	0
Rn50_13_0834.1	0.159373	0.302047	0.456929	0.38632	0.370131	0.228028	0.520636	0.348821	0.516888	0.765691	0.642274	0.168805
AABR07032409.1	0	0	0.0827474	0	0	0	0	0.0541454	0	0	0	0
Sult1b1	0	0	0	0.0275943	0.0423007	0.0868677	0	0.0284752	0	0	0	0.0482301
AABR07061535.1	0	0	0	0	0	0	0	0	0	0	0	0
AABR07017504.1	0	0.297149	0	0	0	0	0.585364	0.784377	0.678008	0	0.280826	0.332136
Bnip1	20.5612	20.1798	19.8003	21.1058	24.8503	18.9619	21.2962	21.0252	18.9395	20.7556	21.1381	20.5558
Glipr1l2	0	0	0	0	0.115584	0	0	0	0	0	0	0
Tmem200c	0.246134	0.269122	0.289508	0.653995	0.510065	0.704326	0.724541	0.544635	0.436663	0.926172	0.779971	0.36097
Chid1	0	0.136239	0.0686998	0.065344	0	0.0342842	0.100643	0.0674302	0.0259049	0.0313971	0	0
Zfp580	4.13572	4.23681	3.73878	4.60606	5.60716	5.65075	4.59043	3.84443	4.9947	5.56544	5.5056	4.61727
Mir3075	0.513379	0.486483	0.490626	0.933321	0	0	0.47917	0	0	0	0	0
Cbx2	0.974599	1.17275	0.975757	1.19059	0.359274	1.22474	0.837461	1.18023	0.970003	1.27025	1.0252	1.09782
Spry1	35.9812	35.69	34.9223	25.322	19.3628	23.3419	25.7956	25.8005	27.4775	24.1995	28.0882	27.666
Rev3l	3.66454	3.95241	3.93403	2.69256	1.74511	2.80465	3.71512	3.97029	3.71248	3.20582	3.43784	3.13743
AABR07046669.2	0	0	0.423212	0	0	0	0.41333	0	0.319164	0	0	0
Dennd1b	5.01198	5.35194	5.18305	2.03995	0.451698	3.10388	9.14655	9.80028	8.9228	2.61379	3.08166	2.33737
Smarca4	17.2014	18.9857	17.5542	20.4945	17.0732	19.4188	24.5058	23.7745	25.1854	22.9074	22.832	21.5853
Set	4.0162	4.04743	3.71636	7.18554	6.75119	6.38478	8.62769	10.2055	8.77561	7.96319	6.50838	7.69752
RGD1562399	0	0	0	0.0802627	0.0615195	0.126335	0	0	0.0954577	0	0.0593069	0.0701429
AC132720.2	0	0	0	0	0	0	0	0	0	0	0	0
AC127217.1	0	0	0	0	0	0	0	0	0	0	0	0
AABR07037415.1	0	0	0	0	0	0	0	0	0	0	0.322688	0
Ndufa7	459.566	462.628	449.608	432.393	617.928	428.552	290.722	288.153	292.232	377.602	363.231	391.227
Rasa4	14.6287	17.4145	15.291	14.9873	12.4217	15.8722	11.9258	12.2783	11.7129	13.8168	16.3965	14.9134
AABR07051741.1	0	0	0	0.223207	0	0	0	0.230333	0	0	0.329859	0
AC126899.1	0	0	0	0	0	0	0	0	0	0	0	0
Dnmt3b	1.04254	1.27333	1.0849	1.26356	0.408918	1.5248	1.4488	1.26044	1.08534	1.53805	1.57684	1.22694
AABR07070799.1	0	0	0	0	0	0	0	0.0700336	0	0	0.100295	0
Lce1m	0	0	0	0	0	0	0.0653151	0	0.0504348	0	0	0
AABR07042794.1	0	0	0	0	0	0	0	0	0	0	0	0
AABR07063635.1	0	0	0	0	0	0	0	0	0	0	0	0
Mirlet7a1	0.580118	0	0.554407	0.351551	0	0	1.08292	0	0	0	0	0
Zbtb43	3.18451	3.89026	3.74005	2.39482	0.463349	2.01284	5.2284	4.48669	5.41988	2.68121	2.95499	3.37298
AABR07067743.3	0	0	0	0.418513	0	0	0.322299	0.647811	0	0	0	0.365745
AABR07053159.1	0	0	0	0	0	0	0	0	0	0	0	0
Sptb	11.2882	11.4485	11.728	3.88422	0.537953	4.04058	11.7503	12.4959	13.2469	7.31054	7.18942	7.15026
Optn	48.7326	49.7564	50.9102	36.9387	28.5527	35.3611	38.8167	39.9867	38.2642	39.9589	40.8661	37.7666
Spsb3	29.2888	29.6467	27.5454	33.6625	28.1668	34.5723	27.4303	30.6579	29.3129	30.7887	34.4564	34.336
RGD1563962	1.18869	0.794028	0.838036	1.14546	1.35769	1.46841	1.34592	1.53542	1.50276	1.44688	1.43102	1.48608
LOC100911766	9.95664	3.97674	1.49415	3.83963	2.02569	8.59454	1.61287	5.71176	3.43973	4.34869	8.80619	2.13533
Ddit3	39.0528	37.7027	34.1321	44.6215	59.4104	43.8093	44.9245	43.6248	43.8312	43.4439	42.6862	43.9096
AABR07040517.1	0	0	0	0	0	0	0	0	0	0	0	0
AC134056.2	0	0	0	0	0	0	0	0	0	0	0	0
Calml5	0	0	0.0306302	0	0	0	0.05983	0.0200428	0	0	0	0
Usp33	11.9661	13.0046	13.9186	14.3269	9.24212	13.6296	16.7174	17.8616	17.8873	16.1529	16.3276	16.7048
Pkp1	0.113378	0.131313	0.0361177	0.412242	0.222352	0.432584	0.587907	0.598715	0.544762	0.48419	0.485119	0.320235
Ifnar2	13.4049	12.9492	12.3754	13.8018	8.70478	14.338	16.5202	17.9047	17.5637	16.3137	15.5888	14.6462
AABR07057302.1	0	0	0	0	0	0	0	0	0	0	0.436578	0.516346
Mir193b	0	0	0	0.423555	0	0	0	0	0	0	0	0
LOC682793	27.7803	5.93601	84.0721	52.32	279.576	205.492	59.2303	100.657	105.017	174.388	74.3925	117.121
5S_rRNA	0	0	0	0	0	0	0	0	0	0	0	0
Zfp513	14.3292	15.7318	14.2562	24.3169	22.1525	24.9389	22.8562	23.8395	21.6374	23.2591	25.8806	22.7659
Surf4	3.02145	3.54591	4.79776	3.66199	2.00796	3.39191	7.636	7.0055	7.63845	3.47171	4.39185	5.48969
Kif3c	1.03502	0.948635	1.08644	1.83024	0.803874	1.76411	2.78729	2.44042	2.88601	2.66788	2.58321	1.70731
Prss55	0.106444	0	0	0.0322524	0	0.0507658	0.0496754	0.0665641	0.0767165	0	0	0
LOC103690996	150.343	150.886	175.979	185.805	215.402	206.051	143.089	164.283	138.615	176.373	254.772	187.103
Foxo1	6.02779	6.46357	6.25874	5.36939	1.15782	5.27409	7.12784	7.05709	7.08818	5.20605	6.12881	6.36053
Smarca1	0.161634	0.250635	0.140427	0.178091	0.0955515	0.182207	0.260582	0.220531	0.296528	0.141191	0.223708	0.186763
Mlkl	4.07165	4.27545	4.06647	4.35687	3.78243	4.18116	4.89592	6.14755	5.5386	5.11074	4.64832	4.74
RGD1305455	2.83993	2.62797	2.75229	4.08028	3.66623	4.70555	3.7707	4.41065	4.45876	4.69362	4.29856	4.20838
Riok3	12.333	12.5737	12.2048	18.442	17.8795	17.437	24.4595	24.6003	23.5	19.6475	17.953	19.3305
AABR07000533.1	0	0	0	0	0	0	0	0	0	0	0	0
AABR07060788.1	0	0	0	0	0	0	0	0	0	0	0	0
AABR07072440.1	22.5269	24.936	25.7199	32.9805	45.187	30.8049	27.2592	28.1119	30.5317	31.7806	31.5109	31.5672
Tln1	28.486	29.5429	27.7364	37.9725	21.8693	37.4679	54.7285	55.0517	58.2359	44.1698	45.5541	42.5291
AABR07021614.1	0	0	0	0	0	0	0	0	0	0	0	0
Ctsd	160.694	155.185	149.652	200.568	231.103	198.598	359.073	366.632	353.425	206.684	214.62	221.622
AABR07071905.1	0	0	0	0	0	0	0	0	0	0	0	0
Racgap1	0.256341	0.355023	0.282669	0.908153	0.42131	0.940427	2.19014	1.45504	1.62012	1.10238	0.90061	1.0025
Nudt10	0.206173	0.659378	0.541846	0.515379	0.478819	0.31957	0.649466	0.515716	0.427206	0.427731	0.392358	0.60053
AC097575.1	0	0	0	0.0781224	0	0	0.24065	0	0	0	0	0
AC096600.2	0	0	0	0	0	0	0	0	0	0	0	0
LOC680273	0.0891119	0.0844433	0.0851624	0.0540017	0	0.0849996	0	0	0	0.0778415	0.0798047	0
AABR07007775.1	0	0	0	0	0	0	0	0.0653647	0	0	0	0
Sec24b	5.17362	5.71601	5.09953	6.68516	3.93326	6.32903	8.2394	8.37116	9.0209	6.93093	6.66941	7.10164
AABR07058935.1	0	0	0	0	0	0	0	0	0	0	0	0
Rps15a	506.463	500.489	486.597	805.294	1035.43	753.458	745.879	741.154	749.233	751.745	686.561	813.384
AABR07030089.1	0	0	0	0.33803	0	0	0	0	0	0	0	0
3281a3	0	0	0	0	0	0	0	0	0	0	0	0
AABR07026021.1	0.332129	0.314729	0.211606	0.13418	0.411382	0	0	0	0.079791	0.0967077	0.396586	0.351785
Olr1747-ps	0	0	0	0	0	0	0	0	0	0	0	0
AABR07072028.1	0	0	0	0	0	0	0	0	0.175306	0	0.108916	0
Ptprg	11.3433	12.7047	11.2759	10.5827	3.2525	10.9828	12.155	11.6415	12.1041	10.8163	11.0763	11.0499
Clcn1	0.616954	0.636217	0.745684	0.164944	0.0337135	0.363475	0.304858	0.363115	0.248483	0.158507	0.292509	0.172977
Vhl	8.13813	8.39727	9.16011	11.3855	9.65074	8.60592	11.6845	13.282	12.31	10.8652	10.6713	10.6417
Map3k10	6.26889	6.67135	5.61465	6.59344	5.21379	5.68218	5.57545	5.33642	5.15682	6.00644	6.12852	6.50085
Cd40lg	0.0224504	0.0425484	0	0.0136049	0.0417113	0.0428287	0	0.0140393	0.0809026	0.019611	0.0201056	0
AABR07044631.1	0.0486065	0.11515	0	0	0	0	0.0226838	0	0	0	0	0.0514832
AABR07064810.1	9.0589	9.5748	6.49306	15.5189	15.698	17.9464	6.66665	9.69577	7.53342	11.7176	12.0131	15.3152
AABR07062791.1	0	0	0	0	0	0	0	0	0	0	0	0
Pidd1	0.126387	0.079844	0.120786	0.178711	0.0587049	0.100462	0.196609	0.0922084	0.166999	0.202405	0.245238	0.691648
Dync1i2	21.029	20.3018	21.7668	27.3274	27.1484	25.9909	36.4016	38.3846	36.5935	28.9622	29.9534	31.6148
Akirin2	32.8332	31.9599	29.7442	37.7923	37.5757	38.0264	38.4064	40.0923	36.6017	38.5237	36.8855	38.4392
Ppard	13.1139	13.5997	13.9797	11.2662	7.33877	11.4035	13.5427	13.6514	14.7086	12.5709	12.9351	12.3839
Mir3564	0	0	0	0	0	0	0	0	0.746616	0.452454	0	0.548617
Ccar2	12.9436	13.5058	12.478	15.7855	9.50224	15.4752	18.4912	18.4217	19.0651	16.8822	17.1632	16.5508
#N/A	0	0	0	0	0	0	0	0	0	0	0	0
AABR07070774.1	0	0	0	0	0	0	0	0	0	0	0	0
Adra1d	2.93307	2.66749	2.70902	1.5985	1.68238	1.84011	2.14968	2.2281	1.98625	2.49333	2.37992	2.39776
Etv5	3.30475	2.4263	2.77417	3.45507	2.71046	3.52143	4.64071	4.55213	4.91383	3.18587	3.07957	3.15346
#N/A	0	0	0	0	0	0	0	0	0	0	0	0
Selv	0	0	0.0485471	0	0.0471901	0	0	0.0635331	0.0732233	0	0	0
Zfc3h1	15.0887	17.1934	15.9605	16.9585	5.79829	17.5212	23.2855	22.7862	25.2349	19.6478	22.0401	20.6869
Tbc1d19	3.70935	3.11166	4.24232	3.22439	1.83591	2.61013	3.37704	3.97379	3.61569	2.97462	2.83181	3.2204
Olr447	0	0	0	0	0	0	0	0	0	0	0	0
AABR07039303.1	0	0	0	0	0	0	0	0	0	0	0	0
Rrp12	1.43864	1.70409	1.7186	4.9322	10.506	12.1851	13.4526	4.42326	13.748	14.3472	15.1266	6.08102
Ggh	4.50203	5.16003	3.40102	4.10532	5.178	4.37607	6.80329	7.85609	7.20018	4.34463	4.83818	4.72306
Ddrgk1	36.8797	39.6655	36.3378	45.7262	59.818	42.9873	43.613	44.58	43.4053	39.4961	43.828	45.703
Ppp2r5b	9.85596	12.289	10.3487	11.487	10.0795	13.0503	10.914	11.1779	11.9948	13.3862	14.6722	12.843
Ifitm10	8.0776	10.9017	10.7607	20.8409	20.6923	20.8965	22.5038	24.185	25.5803	21.3818	21.0442	26.0559
#N/A	0	0	0	0	0	0	0	0	0	0	0	0
Tcf25	36.1143	37.1021	37.2987	46.4824	40.2201	46.7774	52.6308	53.7978	55.9273	47.8747	50.1633	49.5838
LOC688801	0	0.117714	0	0	0	0	0	0	0	0	0	0
Abcc6	0	0	0.00960013	0.0121749	0	0.00958177	0	0	0.00723991	0.00877486	0.0179923	0
Sucnr1	0	0.173415	0	0.110899	0	0.290929	0.0569361	0.190733	0.0439648	0.0532858	0.0546297	0.0646111
Lcn2	68.1264	69.8133	67.165	84.3485	88.3838	82.9087	66.0839	65.7809	64.7616	48.8508	53.9982	49.557
AABR07063152.1	1.10921	1.0511	0.636032	1.34436	0.92738	0.952223	0.72471	0.693641	1.11921	0.193785	0.79469	1.17486
LOC102554232	0.143807	0.163528	0.16492	0.0697176	0.0534368	0.0548684	0.885882	0.0899292	0.0829162	0.829088	1.44242	0.913909
Ednrb	8.08791	8.38098	7.75726	10.5783	1.43241	10.906	17.0259	17.2836	17.11	12.0461	12.5062	13.0964
Lsmem1	10.5498	10.1801	10.4514	4.22797	3.18457	4.09887	8.35965	8.25791	7.86448	4.9768	4.51858	5.36974
AABR07026993.1	0	0	0	0	0	0	0	0	0	0	0	0
Pvalb	0.216059	0.307109	0	0.196397	0.401423	0	0.302493	0	0	0.188733	0.0967464	0
Spt1	0	0	0	0	0	0	0	0	0	0	0	0
Cct5	113.296	103.42	102.521	153.38	190.689	150.901	186.593	182.531	179.253	166.32	162.74	171.581
Ap1b1	11.6605	12.6447	13.1619	14.7167	14.0592	13.6914	19.139	19.2057	19.1351	15.9069	15.1843	15.1871
Olr107	0	0	0	0	0	0	0	0	0	0	0	0
Tbc1d9b	15.5383	16.7985	15.9988	17.1385	9.37485	16.9092	19.2893	18.8874	18.8795	17.4153	17.9189	16.6865
Cyth3	23.3759	22.9416	23.1999	22.1864	16.5975	21.9413	18.5199	19.9162	20.5018	22.1259	21.7207	22.1323
Klhl14	0	0	0	0	0	0	0	0.0178355	0.0308337	0	0	0.030209
Cldn20	0.615277	0.499751	0.504007	0.159796	0	0.503043	0.902437	0.604624	1.07694	0.23034	0.551015	0.651691
5S_rRNA	0	0	0	0	0	0	0	0	0	0	0	0
Eya4	2.0976	2.82627	2.66241	1.66838	0.365363	1.18798	3.48738	3.56626	3.4724	2.86299	2.40685	1.8746
Inpp4a	10.1031	10.3003	10.5834	8.85846	1.64601	8.85681	12.5148	11.7942	12.3651	9.65873	10.1922	9.85288
AABR07029617.1	0	0	0	0	0	0	0	0	0	0	0	0
AABR07012640.1	0	0	0	0	0	0	0	0	0	0	0	0
LOC100912152	0	0	0	0	0	0	0	0	0	0	0	0
C1galt1c1	7.68778	9.58775	8.06488	8.48755	11.2461	9.35591	12.3716	14.5607	14.0111	10.1118	9.73374	10.2955
AABR07036084.1	0	0	0	0	0	0	0	0	0	0	0	0
Srgn	46.4463	39.734	46.8979	55.874	82.4418	58.6311	86.5307	84.9739	85.5803	61.8241	55.873	61.6892
Abhd17b	5.55956	5.62396	5.13382	8.55777	8.89104	8.54746	9.39293	10.518	9.70449	8.36043	7.83599	8.05023
Papolg	3.09916	2.67115	3.09575	3.10497	1.88076	3.07498	4.07005	4.21695	3.79381	3.7683	3.33335	3.34855
LOC100909474	16.5227	22.8284	9.25563	31.9551	13.6084	30.7312	30.6162	32.7623	28.6395	26.5278	33.1243	13.222
Aim2	1.37545	1.76342	2.08773	3.28506	3.23196	2.70114	4.30451	6.07154	4.0236	3.67516	3.76785	3.17081
AABR07032035.1	0	0	0	0	0	0	0	0	0	0	0	0
AABR07008782.1	0	0	0	0	0	0	0	0	0	0	0	0
AABR07028784.1	0	0.0453195	0	0	0	0	0	0	0	0	0	0
AC109025.1	0	0.597528	0	0	0	0	0	0	0	0	0	0
AC119116.1	0	0	0	0	0	0	0	0	0	0	0	0
B4galt1	9.77414	10.4858	10.0669	14.8692	9.03281	13.4291	18.9547	19.3342	18.8704	14.9304	15.6471	15.3144
Tceal7	6.45893	5.16596	3.85084	4.48865	5.17442	4.80434	3.92684	4.3355	3.67283	4.65857	4.66992	4.45619
AABR07030543.1	0	0	0	0	0	0	0	0	0	0	0	0
Fam133b	11.398	8.56619	11.1182	13.338	9.56603	13.0464	17.2417	16.5166	16.7129	14.2137	13.4458	15.2364
Zfp865	2.69937	3.06953	3.00187	2.60243	3.82982	2.85568	2.81725	2.59344	2.26385	2.63664	2.48336	2.36527
LOC691277	0	0	0	0	0	0	0	0.0372076	0	0	0	0
Olr715	0	0	0	0	0	0	0	0	0	0	0	0
AABR07049134.4	0	0.074187	0.149638	0.237214	0.0727275	0.298703	0.365359	0.244787	0.394971	0.205161	0.280447	0.165844
Tas1r3	0.0900455	0.063996	0.150596	0.0409256	0.0836493	0.0644176	0.147079	0.0844643	0.0973469	0.117986	0.161282	0.071531
Pim3	54.7522	55.6441	51.4678	51.9883	55.8659	55.2897	50.1778	53.7958	50.5267	53.7698	61.4719	55.1405
Rn60_X_1237.2	0	0	0	0	0	0	0	0	0	0	0	0
Zfp764	1.88437	1.44553	1.88661	2.9092	2.41739	2.65333	3.35011	3.53516	3.03959	2.42988	2.49116	2.56615
Phospho2	7.66506	7.78604	6.40309	7.10119	6.1985	7.07464	8.18369	9.46593	9.14107	7.7072	6.8398	7.41781
#N/A	0	0	0	0	0	0	0	0	0	0	0	0
Olr92	0	0	0	0	0	0	0	0	0	0	0	0
AABR07061022.3	0	0	0	0	0	0	0	0	0	0	0	0
LOC102549636	0.0783944	0.0742873	0	0	0	0	0.0731705	0	0	0	0	0
Lgi4	3.50417	3.56454	3.47188	4.06502	2.52448	4.10645	2.58983	2.63852	2.56677	4.48527	3.97075	3.92364
Ythdf3	14.1046	12.9815	13.6665	11.9188	7.85641	11.667	20.0406	22.1948	20.1194	13.786	13.9209	15.2058
Nectin3	4.73348	4.48549	5.23796	6.21145	4.16581	6.11058	6.8098	7.45579	6.90001	5.0364	5.96023	6.333
Mettl23	8.15892	8.70551	7.9815	6.89086	8.17616	6.86322	6.05622	5.50388	6.57485	6.84643	6.38623	7.41697
AABR07060953.1	0	0.118988	0	0	0	0	0	0	0	0	0	0
Brox	14.0514	14.0723	14.6403	13.8305	12.0367	15.2253	20.475	19.9417	18.9524	16.8714	16.2391	16.9802
Ccdc142	0.832577	0.305403	0.179669	1.54617	0.149697	0.256179	0.100271	0.167951	0.212924	0.328448	0.505097	1.59302
Hivep2	2.67367	2.85541	2.74991	2.78397	1.24474	2.76821	4.89304	4.82669	4.77071	2.9612	3.19072	3.2374
Notch2	2.33771	2.37446	2.08749	2.94398	0.502196	2.80123	8.20955	8.18195	8.60324	3.52892	4.1086	3.82243
#N/A	0	0	0	0	0	0	0	0	0	0	0	0
Clec2d	0.878967	1.24938	1.26002	1.93087	0.204133	2.09601	5.74278	5.90882	7.0476	1.82353	2.95187	1.62923
Olr378	0	0	0	0	0	0	0	0	0	0	0	0
AABR07012310.1	0	0	0	0	0	0	0	0	0	0	0	0
Rasgef1a	0	0	0.100924	0.0426639	0	0.0335769	0	0.044026	0.0761113	0.0922479	0.0945743	0
LOC100912317	0	0	0	0	0	0	0	0	0	0	0	0
AABR07055788.1	0	0	0	0.186006	0	0.146388	0	0.191944	0.11061	0	0	0
Tmed8	2.48369	2.91394	1.97801	2.32934	0.0549348	2.31266	4.3604	3.62404	3.06866	2.0146	3.07162	3.44494
Tas2r102	0	0	0	0	0	0	0	0	0	0	0	0
Fut10	1.07762	0.964431	0.815305	1.12467	0.806419	1.11355	1.57857	1.59112	1.52097	1.42507	1.30016	1.37919
AABR07007908.1	0	0	0	0	0	0	0	0	0	0	0	0
Ptpn1	10.714	10.8274	9.85037	13.4991	8.56713	13.4537	27.3421	26.0578	26.7333	15.5194	16.5484	14.4725
Zfpl1	6.05463	5.33714	6.16307	9.01062	9.81026	8.27335	7.75394	8.57627	9.33632	9.64298	8.44864	8.97815
Slc7a3	0	0.0659671	0.0443526	0.112496	0.0431128	0.0664017	0.173268	0.0580439	0.117069	0.0202699	0.0207811	0.0491561
Itpripl1	1.82544	2.28686	2.48375	2.8874	0.689806	2.95119	3.6675	3.67611	3.59013	3.48643	2.77082	2.9166
Slc5a5	0.0203908	0	0	0	0.0568271	0	0.0190321	0.0127513	0	0.0356238	0	0
Plcb4	21.8345	22.8274	23.2573	15.7556	9.14591	15.103	19.379	19.9495	18.392	17.2755	18.2629	16.8491
Sirpa	13.5458	14.2701	12.719	19.6435	13.9216	19.8593	32.6545	33.2676	32.3893	21.8338	21.1926	22.0909
Ctnnd1	25.2159	25.1455	25.0136	26.5769	14.6364	27.439	34.4368	33.7723	33.2918	27.8727	29.6216	28.3165
AABR07032977.1	0	0	0	0.199745	0	0	0	0.206122	0.23756	0	0	0
Fam214b	9.26154	9.76487	7.82979	12.0267	7.96548	10.4117	19.4499	16.7863	18.2096	14.8468	15.8821	14.3911
Ins2	0	0	0	0	0	0	0	0	0	0	0	0
LOC100359505	25.099	27.5985	14.2562	44.9124	51.4715	36.8145	43.317	39.6831	36.3495	33.9211	32.6561	35.1115
5S_rRNA	0	0	0	0	0	0	0	0	0	0	0	0
Apobec2	156.264	157.668	153.041	223.754	282.231	211.916	141.783	145.322	141.486	203.503	210.066	206.031
Rn50_X_0551.5	0	0	0	0	0	0	0	0	0	0	0	0
AABR07047840.1	0.0717081	0.0679513	0.06853	0.130365	0.0666144	0	0	0	0.103363	0.125278	0.128437	0
Olr286	0	0	0	0.0748777	0	0	0.0576637	0	0	0	0	0
AABR07035501.1	0	0	0	0	0	0	0	0	0	0	0	0
Chmp5	32.3899	29.2771	30.4504	40.9344	49.441	39.4889	46.0243	47.5729	46.6567	41.2309	38.7285	44.5012
AABR07021687.1	0.182427	0.17287	0.087171	0.386927	0.0847344	0.348017	0.510813	0.05704	0.262959	0.31871	0.490121	0.676283
Rbfox2	14.98	17.9023	16.9909	16.0742	5.17047	12.8326	24.0155	24.722	26.0169	16.9472	18.7987	17.8204
AABR07061261.1	0	0	0	0	0	0	0	0	0	0	0	0
Ccdc186	8.36547	7.84754	8.29602	6.547	2.28451	6.7364	12.7911	12.8811	11.7706	8.15204	7.35998	7.56933
Cask	1.70763	1.48332	1.35995	1.81093	0.616905	2.5111	2.58999	2.68447	2.76913	1.906	1.76291	1.78357
Ankmy2	27.3845	26.792	25.3214	19.681	19.7489	18.2616	22.2863	22.172	21.4679	19.6195	18.5653	18.8788
Alpk3	18.8079	20.8409	19.8604	14.2678	9.68675	12.8881	20.1592	20.8825	21.5073	17.7683	18.9973	16.9169
Lrrfip2	46.3198	46.2911	44.3587	51.9853	46.9873	53.257	51.9038	52.3028	55.2471	56.607	58.178	54.4558
Drap1	73.9383	76.3204	74.9199	106.39	124.647	101.893	91.2706	87.5457	85.6728	101.206	103.351	97.7616
AABR07027315.1	0	3.11166	1.04605	0.994955	1.01681	0	1.53244	1.7112	1.97219	1.43419	0.490121	1.15934
AABR07019387.1	0	0	0	0	0	0	0	0	0	0	0	0
Gen1	0.230152	0.28224	0.23289	0.590704	0.45276	0.542371	1.1499	0.948208	0.848894	0.780523	0.812331	0.70264
AY172581.17	0.966864	1.83242	0.924012	1.75775	1.79637	2.76674	0	0	0.696841	6.75665	6.92704	3.07226
AABR07049508.1	0.338755	0.561764	0.161871	0.153964	0.236019	0	0.158091	0.264799	0.0610372	0.369889	0	0
AABR07072826.1	0	0	0	0	0	0	0	0	0	0	0	0
Ncoa6	4.8271	5.1737	4.98586	4.84209	2.54401	4.77793	6.75412	7.09941	7.17661	5.61708	5.55695	5.5901
AC107505.2	0	0	0	0	0	0	0	0	0	0	0	0
Olr508	0	0	0	0	0	0	0	0	0	0	0	0
C2cd4a	0	0	0.108389	0.378012	0.526794	0	0.211715	0.0709236	0.163482	0.148607	0.609417	0.180191
Copb1	16.1395	15.6075	16.4392	21.2703	22.239	22.5026	32.5657	35.2322	32.2739	23.5276	24.1365	25.9648
Soat2	0.0264532	0.0752019	0	0.0160306	0.0245741	0	0	0.0992542	0.0190654	0.0462151	0.0473806	0.0280188
Rcsd1	25.7375	25.7008	24.5968	25.8964	22.3613	25.3322	27.2286	28.3743	27.8244	27.5655	28.3984	29.1885
AABR07017783.2	0	0	0	0	0	0	0	0	0	0	0	0
AABR07000159.2	0	0	0	0	0	0	0	0	0	0	0	0
Sox30	0.126387	0.143719	0.144943	0.107227	0.0234819	0.096444	0.0471862	0.11065	0.145745	0.110403	0.181099	0.133867
Ints9	1.45827	1.33869	1.00168	1.06321	0.613842	2.21687	2.06291	1.43913	1.37945	1.0748	0.734604	1.47217
Bend7	1.74842	2.50648	1.5424	1.63007	0.707997	1.79603	2.38511	2.88762	2.16484	1.56646	2.1279	1.66196
AABR07068085.3	0	0	0	0	0	0	0	0	0	0	0	0
Bod1	20.5169	19.3289	22.3055	21.1798	22.1991	19.7597	18.0364	18.7728	16.8216	19.6586	22.1485	20.8888
AABR07006736.1	0.071975	0	0.068785	0.0872334	0.0668624	0.137307	0.0671789	0	0.051874	0.125744	0	0.0762347
Rgs2	10.1588	10.1332	11.5608	16.6055	17.5705	16.3199	27.385	29.8411	26.8782	18.0398	15.5619	18.9008
Htr1d	0	0	0	0	0	0	0	0	0	0	0	0
Dlx4	0	0	0	0	0	0.0339685	0	0	0	0	0	0
Isyna1	26.1736	24.417	23.4867	36.4754	30.9799	35.8276	27.9814	29.229	29.9185	29.7908	33.0916	33.5071
AABR07030563.1	0.716195	0.339337	0.114076	0.506349	0.221774	0.113857	1.11412	0.14929	0.344119	0.312808	0.213798	0.252861
Tma16	2.1105	1.07689	2.30141	3.27939	5.68068	2.96805	3.1821	3.40101	3.95873	3.92352	3.53783	3.00921
LOC102548013	0.0187923	0	0.0179594	0.0398584	0	0.00896254	0.00877003	0.0117517	0.0609482	0	0.0420739	0
Eif2b5	14.6054	13.9991	14.1718	16.5389	16.0946	15.9216	18.2574	19.5134	19.482	18.5352	16.4167	17.3049
Cldn7	0.0995911	0.14156	0	0.0603521	0	0.0474976	0	0.0311394	0.143555	0	0.0445947	0.0527426
Xrcc6	4.78477	4.56093	4.95152	6.07364	5.47064	6.26533	7.0028	7.25903	8.20293	6.57858	6.59236	7.19709
LOC100911398	0	0	0	0	0	0	0	0	0	0	0	0
AABR07062298.2	0	0	0	0	0	0	0	0	0	0	0	0
AABR07052151.1	0	0	0	0	0	0	0	0	0	0	0	0
AABR07024669.1	0	0	0	0	0	0	0	0	0	0	0.0553278	0
Sln	1.75204	0.553415	0.558128	2.94925	2.89348	3.15668	0.181699	1.21736	0.140304	1.0203	0.697353	1.64953
Snx10	2.20245	2.83526	3.05798	5.5402	3.74458	5.90607	13.6141	13.3831	13.4476	5.4813	6.43828	6.25015
Evx2	0	0	0	0	0	0	0	0	0	0	0	0
AABR07061802.1	0	0	0	0	0	0	0	0	0	0	0	0
Sap25	5.2675	5.64832	4.50415	9.28228	8.11263	11.0405	6.72784	7.36817	9.34117	8.7788	9.80711	8.14864
Plbd1	46.6151	45.2863	45.0825	34.1583	40.0022	32.8926	35.9969	35.6529	35.2478	34.3049	34.5388	35.0937
LOC686013	4.97017	5.38799	5.39588	4.02392	4.76487	5.0063	3.4514	3.60536	3.00898	4.20264	4.23741	3.79031
Skida1	1.1983	1.06873	1.48201	1.19604	0.720294	1.18783	1.03073	1.0726	1.287	0.841502	1.03106	0.945693
Angptl2	19.4736	20.6503	20.2266	16.7263	5.54873	16.2856	23.1146	23.9803	22.6645	17.6302	19.5403	16.4663
Hmgb1	0	0	0	0	0	0	0	0	0	0	0	0
AC141521.1	0.848609	1.38492	0.292861	0.628534	0.854023	0.854417	0.352027	0.3243	0.492688	0.658917	0.696645	0.749027
AC095695.1	0	0	0	0	0	0	0	0.335902	0	0	0	0
AABR07047249.1	0	0	0	0	0	0	0	0	0	0	0	0
Pcdhb14	0.77543	0.941469	0.741063	1.08666	0.855414	0.901443	0.995168	1.48504	1.15267	1.22771	1.36718	1.30898
Nsmf	7.31415	7.65759	6.9618	11.0988	7.34255	11.1964	8.80873	9.18463	10.1816	10.4853	12.0968	11.0895
Bcor	3.9718	4.37243	4.14163	3.65148	1.82382	3.84029	4.69515	4.55448	4.9231	4.14124	3.75143	4.15895
AABR07024854.1	0	0	0	0	0	0	0	0	0	0	0	0
Mir1188	0	0	0	0	0	0	0	0	0	0	0	0
AABR07041779.1	0	0	0	0	0	0	0	0	0	0	0	0
AABR07037149.1	0	0	0	0	0	0	0	0	0	0	0	0
Gabpb1	4.48569	4.55902	3.86486	5.91552	4.96592	6.62864	7.37568	7.89208	7.23643	7.08554	7.03528	7.1883
AABR07069431.1	1.54698	1.46594	2.21763	2.34367	0	2.95119	0	1.4511	0.557473	2.02699	1.38541	0
AC130035.1	0.779729	0.443327	0.52162	0.283509	0.144868	0.520623	0.218331	0.43884	0.224788	0.749225	0.279316	0.165175
AABR07028492.5	0	0	0	0	0	0	0	0	0	0	0	0
AABR07029842.1	0.943282	0	0.450738	0.285814	0	0.899752	0	0	0.339923	1.23597	0.844761	0
Rbm47	0.54448	0.703574	0.449392	0.944868	0.20692	1.08592	3.37259	4.37991	4.13824	1.68628	1.50716	0.865056
Secisbp2l	8.80412	9.26395	8.28887	8.47301	3.56843	8.5583	14.0098	14.0153	14.4286	8.59684	9.85154	9.59245
Myrf	0.461493	0.705669	0.781844	2.21189	1.30562	1.92086	2.40824	2.41369	2.57772	2.51954	2.80851	2.48847
AABR07018965.1	0	0	0	0	0	0	0	0	0	0	0	0
AC094643.1	0	0	0	0	0	0	0	0	0	0	1.16748	0
Rbm46	0.0324451	0.0307453	0.0620143	0.0983084	0	0	0.211982	0.162315	0.187072	0.0283416	0	0.103096
Tmem209	7.04409	6.17855	5.98081	8.44921	7.11156	8.21831	11.0575	10.6666	10.4054	9.35692	8.68053	9.34164
Egr1	6.93176	7.99122	8.53752	7.82846	7.88566	8.50352	9.15123	8.87812	9.93834	7.04267	7.78463	7.38127
Abcc12	0.0131159	0	0	0.0158965	0.0365528	0	0.0244839	0.032808	0	0.0458285	0.0352382	0
Bcl2l12	2.60573	3.83379	3.73537	6.46172	6.81601	5.98479	5.24821	6.15344	5.0904	5.30109	6.04888	5.12043
Cfap97	2.22355	2.08004	2.07051	2.14213	1.69485	2.39285	4.09755	4.08232	4.10914	2.66448	2.98697	2.50612
Slc13a3	0.127099	0.137647	0.156171	0.0770221	0.0506019	0	0.101683	0.0908355	0.183207	0.142746	0.276431	0.11539
AC239813.1	0	0	0	0	0	0	0	0	0	0	0	0
AABR07028479.3	0	0	0	0	0	0	0	0	0	0	0	0
Commd10	9.75562	9.24452	8.97795	12.359	13.8364	12.5604	15.3258	17.3981	16.1166	15.1849	14.2016	13.0544
LOC103694404	22.6841	11.6288	3.90928	36.7325	6.2182	21.992	32.9736	4.8835	10.4526	28.9106	9.6579	17.3307
Rn50_20_0064.3	0	0	0	0	0	0	0	0	0	0	0	0
Nars	21.2756	21.6479	20.8178	37.6162	36.3132	38.1224	52.9616	53.305	51.0241	42.9144	43.17	41.1345
Kif22	1.05879	0.69999	1.0354	4.17802	4.07157	3.52301	5.58469	5.71262	5.48363	4.3663	4.58667	4.06852
#N/A	0	0	0	0	0	0	0	0	0	0	0	0
Mir25	4.1437	2.61774	2.64004	6.27769	6.4156	7.90496	3.86759	4.31874	3.48421	7.84253	5.56637	3.65745
AC121031.1	0	0.0649794	0	0	0	0	0	0.0428811	0	0	0	0
Apip	9.29339	10.5769	9.52244	9.28953	11.7483	9.0473	8.62941	8.59754	7.5611	9.79184	9.35237	9.08231
Vdac3	343.621	362.175	352.101	273.508	319.096	267.344	266.656	252.157	246.779	272.441	263.824	269.656
5S_rRNA	0.547281	0	0	0	0	0	0.510813	1.02672	0	0	0.490121	0
Mir880	0	0	0	0	0	0	0	0	0	0	0	0
AABR07059780.1	0	0	0	0	0	0	0	0	0	0	0	0
Ppp1r1a	8.38906	10.2209	8.48254	6.69512	8.7673	6.39439	5.69776	5.38658	5.80326	5.98676	5.60111	6.38649
Rn60_20_0050.1	0.359875	0.613838	0.756636	0.610634	0	0.686535	0.537431	0.765157	0.363118	0.440104	0.580118	0.304939
Olr1338	0	0	0	0	0	0	0	0	0	0	0	0
LOC682206	2.48912	2.38279	2.13607	2.26261	1.17975	2.8588	2.70257	3.62139	3.51472	2.46274	2.27464	2.58263
Slco1a2	0.0184751	0	0	0	0	0.0176225	0.017244	0	0	0	0	0
AABR07058406.1	0	0	0	0	0	0.174009	0.170271	0	0	0	0	0
AABR07049134.2	0	0	0	0	0	0	0	0	0	0	0	0
Olr657	0	0	0	0	0	0	0	0	0	0	0	0
Sec14l2	0.448141	0.445896	0.492521	0.719667	0.5412	0.769429	0.899299	0.938813	0.613673	0.587194	0.86287	0.97306
Sh2d1b	0.484779	0.918762	0.926586	1.9585	0.225172	1.38722	8.59703	9.90303	8.56008	1.2704	1.73658	2.13946
AABR07039234.1	1.02676	1.1975	1.47188	1.45981	0.33017	1.16772	2.83816	3.11161	2.64695	1.62132	2.2988	1.58946
Homer1	12.4404	13.958	13.21	5.68031	1.72548	6.01554	17.5784	17.585	17.9321	9.01808	8.97473	7.82362
Limd1	14.5413	16.0906	16.8873	10.7826	5.81374	9.56872	17.0227	17.3234	16.8922	11.5097	11.6489	11.9738
Hsd11b2	0.0934168	0.147538	0.208312	0.188701	0.028927	0.178212	0.029064	0.194726	0.112213	0.081602	0.0557733	0.0659637
Khdrbs1	23.6517	22.0352	23.2166	28.3842	28.5487	29.8622	37.1093	36.8447	37.1861	29.2221	31.3659	32.363
Zfp653	2.82656	3.69885	3.11291	4.48615	3.60107	3.92864	3.794	3.97284	4.30716	4.27973	3.44745	4.02031
Tsc22d1	60.1062	56.6586	59.0719	120.808	129.648	119.173	123.896	131.885	124.136	146.293	147.327	150.001
Mapre2	37.1672	40.9505	39.4069	34.8146	24.7084	34.2269	36.1641	36.0934	35.8899	35.4817	38.2697	37.0995
Txndc16	4.36268	4.2235	3.22278	2.25793	1.48967	2.5418	3.25758	3.52451	3.24626	2.94573	2.76659	2.72257
#N/A	0	0	0	0	0	0	0	0.206122	0	0	0	0
Katnbl1	3.28469	2.96199	3.59479	3.82051	2.41156	5.40714	6.72501	7.4874	6.75841	4.7204	5.17156	5.892
AABR07017626.1	0	0	0	0.0099252	0	0	0	0	0	0	0	0
AABR07022093.1	0	0	0	0	0	0	0	0	0	0	0	0
Zfp879	0.64047	0.536887	0.423751	0.447835	0.526325	0.493431	0.413856	0.431324	0.426094	0.408842	0.463274	0.521827
#N/A	0.197319	0.373963	0	0.23915	0	0.376427	0	0.123393	0	0	0.17671	0.417994
Tmem53	5.01976	4.51158	4.40163	3.0106	4.71126	3.89959	2.8015	2.97727	2.9092	3.20956	3.52223	3.12433
RGD1311084	0.49944	0.728114	0.51402	1.44345	1.57034	1.79563	1.64949	1.56161	1.49521	0.939666	1.54826	1.46492
Plekhn1	1.864	1.72709	1.54387	2.0458	0.904277	2.07431	1.75912	1.82618	1.91065	1.71871	2.17011	2.34724
Sema6b	7.53988	8.08799	7.45071	13.4973	10.8707	13.8517	12.4	12.4948	12.7812	13.3306	14.8282	14.4069
AABR07027870.1	0	0	0.0866939	0.0962023	0	0	0	0.156001	0.13076	0.0792413	0	0.0720623
Rn50_5_1052.2	0	0	0.582055	0	0	0	0	0.0952163	0	0.26601	0	0
Actbl2	0	0.0200046	0.0403499	0	0	0.0402727	0	0	0.0152149	0.0737625	0	0
Txndc15	13.9595	13.951	13.8875	13.9141	13.7828	13.2789	14.2752	15.0023	15.9985	13.2268	12.2282	14.9472
AABR07058578.3	0	0.106743	0.053826	0	0.0523214	0	0	0	0.0405927	0.147597	0	0
Rsbn1l	4.39535	4.92679	4.91971	4.19747	2.55792	3.89888	6.9279	6.59881	6.15078	4.2727	4.42641	4.72794
AC135310.1	0	0	0	0	0	0	0	0	0	0	0	0
U2af1l4	23.3498	24.417	25.1331	28.0655	34.1759	28.1285	21.9292	17.6852	21.0098	26.6465	24.2014	26.2166
Trim55	38.1789	35.8472	36.8839	26.4624	22.7508	25.6755	39.8596	41.6924	43.938	34.5727	32.7618	31.8922
Olr383	0	0	0	0	0	0	0	0	0	0	0	0
AABR07065792.2	0	0	0	0	0	0	0	0	0	0	0	0
Capza1	14.9956	14.1251	14.7248	25.1015	20.7875	24.5913	42.0728	44.9827	44.1347	27.4032	27.3723	29.1286
Acad8	25.7205	27.4863	25.7916	18.7721	15.4784	16.5646	20.6772	23.7153	22.4613	19.1876	19.2932	17.151
Chit1	0.576945	0.628727	0.551375	0.699256	1.15232	0.908029	0.619275	0.559224	0.70689	0.982754	1.11088	0.611091
AC135265.3	5.2738	12.4938	10.9201	17.5775	15.5141	20.1217	20.5099	23.0856	25.3397	25.3374	14.9561	24.2057
Armc3	0.0815919	0.057988	0.0584818	0.086528	0.227388	0.11674	0.133271	0.191337	0.176416	0.142545	0.0548026	0.0648156
Tbx1	0.437825	0.889044	0.478195	0.720158	0.900605	1.16337	0.788112	0.880045	0.833956	0.846857	0.952235	0.993722
Adam10	18.0703	17.5447	17.6795	17.5357	8.12993	16.8563	21.8158	23.5971	22.877	18.7303	18.132	18.9449
Rab40b	3.514	3.12543	2.91638	1.56909	1.57492	1.23489	1.72623	2.15891	2.04387	2.01945	1.73912	1.43655
AABR07018028.2	0	0	0	0	0	0	0	0	0	0	0	0
Tssk6	0.401003	0.464438	0.468393	0.594018	0.662256	0.509998	0.623804	0.612983	0.706475	0.544891	0.558633	0.471929
AABR07004100.1	0.232979	0	0	0	0	0	0.217455	0	0	0	0	0.246768
Mir222	0	0	0	0	0	0.53723	0	0.352208	0.405927	0.491989	0	0
AABR07018048.3	0	0	0	0	0	0	0	0	0	0.052296	0	0
Hivep3	0.368065	0.393786	0.312039	0.550422	0.292287	0.571921	1.19685	0.98007	1.16806	0.643029	0.829374	0.773409
AABR07040782.1	0.149901	0	0.143258	0.18168	0	0.214476	0.0699563	0.18748	0.108037	0	0	0.158773
AABR07070416.3	0	0	0	0	0	0	0	0	0	0	0	0
Rn60_10_0615.3	0	0	0	0	0	0	0	0	0	0	0	0
AABR07054370.1	59.841	63.9696	63.7652	78.5447	84.397	72.9488	80.8128	78.3287	78.0337	75.9362	72.0007	72.3318
AC141959.1	0	0	0	0	0	0	0	0	0	0.745218	0	0
Ephx4	0.0983251	0.0931739	0.187935	0.148962	0.0913408	0.0937877	0.0917732	0	0.106298	0.0858896	0.308195	0.156216
Gpr139	0	0	0	0	0	0	0	0	0	0	0	0
Tmprss11e	0	0	0	0	0	0	0	0	0	0	0	0
AABR07063852.2	0	0	0	0	0	0	0	0	0	0	0	0
Frmd6	11.118	12.8543	11.1769	10.3724	6.38812	9.62343	12.1106	12.2259	12.7611	10.5559	10.9008	10.7393
Pcdh12	7.35622	6.85739	6.96779	8.78382	4.67036	8.65676	7.16058	6.90707	6.91743	8.15588	8.53699	9.07097
Pdlim5	187.21	191.005	185.297	166.944	99.4978	158.002	250.43	249.628	231.716	208.155	199.463	197.171
Sez6l	0.0726813	0.0573946	0.0347301	0.0293632	0	0.0346636	0.0339191	0.00757516	0.0261916	0.021163	0.0433935	0.025661
Rn50_X_0637.4	0	0	0	0.138953	0	0	0	0	0	0	0	0
Rn50_X_0681.1	0	0	0	0	0	0	0	0	0	0	0	0
Tyrp1	0.0216059	0.020474	0.061945	0.0523726	0.0602135	0.0618265	0	0	0	0.0188733	0.0773971	0
Olr1456	0	0	0	0	0	0	0	0	0	0	0	0
Syap1	15.2824	17.7268	15.3622	14.8828	14.9803	15.6254	18.2475	19.0177	17.5899	15.582	15.3341	16.5117
Foxn2	5.53888	6.48572	5.28174	7.02362	4.71476	7.13358	11.4897	11.2685	10.701	7.76908	8.01964	8.0247
AABR07005779.5	0.0459318	0	0.131688	0.125256	0.213345	0.175249	0.450146	0.301594	0.148968	0.240736	0.143971	0.291901
Hmcn1	6.10458	6.28703	5.6186	5.15401	1.30172	5.46839	5.51015	5.62334	5.59405	6.26384	6.62914	6.16904
Trim65	6.41775	6.19176	6.15185	8.78877	7.00656	7.39769	6.96734	7.7235	8.00715	8.29902	7.86585	7.80386
AABR07019774.1	0	0	0	0	0	0	0	0	0	0	0	0
Cdhr2	0.0885001	0.0698863	0.0563852	0.0536309	0	0.154763	0.123904	0.0830147	0.0744148	0.115961	0.118885	0.0468689
Erp44	21.3611	22.7328	21.2635	29.524	37.2113	30.5807	35.487	37.0414	34.9799	30.8188	32.6902	32.4675
Olr1206	0	0	0	0	0	0	0	0	0	0	0	0
Smim22	0.720644	0.256083	0.344352	0.491298	0.167364	0.343694	0.0840779	0.450651	0.194769	0.236063	0.40336	0.286235
Capns1	4.77464	5.5048	3.27017	6.17263	7.90994	39.6224	62.6135	15.775	3.78531	5.07444	36.4881	30.849
Olr1106	0	0	0	0	0	0	0	0	0	0	0	0
AABR07065772.1	0	0	0.160698	0	0	0	0	0	0	0	0.150588	0
Ecel1	0.0237106	0.0449367	0.0377662	0.0383162	0.0513947	0.0452328	0.0442612	0.0197697	0.0341775	0.0414236	0.0283122	0.0585989
AABR07064304.1	0	0.223466	0.225369	0	0.438139	0	0.220106	0.442408	0	0.205995	0	0.999108
Prkab2	9.60619	9.0545	9.213	7.60696	5.63277	7.21334	12.0978	11.8226	12.5088	8.45077	8.96896	10.1747
Bnc1	0	0	0	0	0.0114031	0	0	0.00767614	0	0	0	0
Nhlrc2	6.03628	6.12947	6.74033	4.5975	1.95967	5.38195	8.63492	9.13889	8.59107	6.42732	6.73737	6.38007
LOC102552182	0	0	0	0	0	0	0	0	0.0700343	0	0	0
AABR07003941.7	0	0	0	0	0	0	0	0	0	0	0	0
AABR07044473.1	0	0	0	0	0	0	0	0	0	0	0	0
Kars	53.2994	48.4796	53.4219	60.9387	59.3506	56.4456	71.3102	70.7596	68.6691	62.0779	63.2068	62.5639
RGD621098	6.7165	6.18701	6.00086	5.83078	3.3954	5.89999	8.25168	8.1463	7.3174	6.22179	6.54656	6.65077
AC110837.1	0.189581	0	0.181179	0.344658	0.176115	0.542497	0.176948	0.118554	0.136636	0.331208	0	0
AABR07057765.1	0	0	0	0	0	0	0	0	0	0	0	0
Olr310	0	0	0	0	0	0	0	0	0	0	0	0
Slc2a12	3.08514	2.79001	2.86762	1.79276	0.981503	1.42435	2.13008	2.42261	2.58904	2.11658	2.11949	1.76069
Tlr12	0.402767	0.368943	0.333594	0.70782	0.536291	0.525046	0.451114	0.461758	0.512834	0.445648	0.50498	0.540365
Blvra	13.2867	11.9463	9.69838	14.8038	17.1052	14.42	20.018	18.4168	19.6046	12.8401	15.5062	14.0731
#N/A	0	0	0	0	0	0	0	0	0	0	0	0
Hbp1	25.6494	24.8651	23.4051	20.4464	16.7178	18.5422	25.6546	26.5962	23.4662	22.0807	20.7185	22.4658
Grn	48.0032	51.2614	48.8388	75.9304	77.0089	71.1335	115.476	114.428	113.416	75.5727	79.549	78.8157
Rn50_X_0646.2	0	0	0	0	0	0	0	0	0	0	0	0
Pcolce	25.0714	27.3302	24.9746	44.9808	54.7071	42.9062	35.4256	40.6948	40.2805	41.6269	44.9712	45.3182
Emg1	8.18766	8.8714	9.15925	9.5388	19.4574	16.7094	21.386	13.5147	21.0882	19.2941	18.5586	11.3949
Fbxo25	6.49992	6.41603	5.64243	5.613	3.97516	5.94164	9.15076	8.43425	8.62756	6.10369	6.93675	6.36827
Krtap16-1	0	0	0	0	0	0	0	0	0	0	0	0
RT1-A1	25.2816	27.8166	30.6134	30.2187	44.0741	41.9998	41.8854	48.6223	39.1659	34.1999	32.2692	47.2207
Msln	0.345467	0.176275	0.380949	0.547537	0.765288	0.456264	0.272839	0.166182	0.21068	0.13928	0.142793	0.0844413
AC134746.1	0	0	0	0	0	0	0	0	0	0	0	0
Ddost	44.1792	44.6226	44.5651	70.9047	72.7256	72.9271	79.2353	83.0659	74.5	72.6987	73.3021	72.9098
Bhlhb9	3.78011	3.8263	4.1052	4.12594	4.13012	4.50709	6.11425	5.64107	5.88226	5.04685	5.30877	4.91379
AABR07063544.1	7.63314	6.52409	4.86322	11.0653	6.39574	9.45088	9.02437	8.51715	12.5992	9.62247	14.4492	10.3994
Lrg1	28.7297	31.2115	26.0348	38.3487	49.5482	39.2816	53.0752	49.5659	53.1744	36.1963	39.0503	38.3976
#N/A	1.12943	0.945167	1.31768	1.41331	0.735807	1.06332	1.76608	1.52264	1.62802	1.17878	0.985199	1.78665
AABR07053412.1	0.124222	0	0	0	0	0	0	0	0	0	0	0
Scml2	0.239939	0.265263	0.305739	0.460441	0.28481	0.394158	0.771384	0.783566	0.691718	0.395897	0.584947	0.451803
AABR07051746.2	0	0	0	0	0	0	0	0	0	0	0	0
AABR07004033.1	0	0	0	0	0	0	0	0	0	0	0	0
Crebl2	5.2738	5.43976	4.99547	3.76156	0.953824	3.51685	4.83526	4.9907	5.34824	3.83221	3.88706	3.70747
AC132635.1	0	0	0	0	0	0	0	0	0	0	0	0
Slco1c1	0	0	0	0.0254562	0.0390232	0	0.019604	0.0525379	0.060551	0.0366943	0.0188099	0.0222466
Cd209e	0.0809091	0.153341	0.0773232	0.0980616	0.0751619	0	0.302071	0.151788	0.174939	0	0.144917	0.0856976
AABR07051567.1	0	0	0	0	0	0	0	0	0	0	0	0
AABR07005794.1	0	0	0	0	0	0	0	0	0	0	0	0
Meis2	8.04515	8.52056	8.91349	7.82684	6.48451	7.22248	10.0857	10.2839	10.744	8.68121	7.75231	7.89472
Sh3bgr	226.023	215.381	204.831	198.936	233.763	192.947	162.628	169.263	159.872	202.346	204.185	195.863
AABR07034310.1	0	0	0	0	0	0	0	0	0	0	0	0
Ankrd61	2.13509	2.17127	1.49302	1.86189	0.580514	1.98688	2.04142	1.79108	1.87659	1.86505	2.51836	1.59956
AABR07028480.1	0	0	0	0	0	0	0	0	0	0	0	0
Olr162	0	0	0	0	0	0	0	0	0	0	0	0
AC133055.3	0	0	0	0	0	0	0	0	0	0	0	0
LOC690384	0	0	0	0	0	0	0	0	0	0	0	0
Sntg1	0	0	0	0	0	0	0	0	0	0	0	0
AABR07052639.1	0	0	0	0	0	0	0	0	0	0	0	0
AABR07030086.1	0.271083	0	0	0.164276	0.755482	0.775721	1.01208	1.18664	1.36763	0.236798	0	0.287127
AABR07035868.1	1.41492	2.17879	1.69027	0.32154	1.15011	0.843517	0.990479	0.774213	0.764826	1.39047	1.90071	1.31133
Olr774	0	0	0	0	0	0	0	0	0	0	0	0
LOC100911130	0.111776	0	0.106822	0.135472	0	0.319854	0	0.0698987	0.161119	0.0976394	0	0
LOC100910402	0	0	0	0	0	0	0	0	0	0	0	0
AC095390.1	1.10952	0.826091	1.51477	1.20065	0.736217	1.2095	2.07117	2.57708	1.99914	1.38456	0.709738	1.76277
Natd1	0.17421	9.73989	0.499466	0.527854	0	0.332341	1.30081	0.326824	0.627785	0.304353	0.312029	0.73808
Catsperg1	0.408633	0.427283	0.579051	0.42695	0.170169	0.430098	0.236733	0.370088	0.2742	0.516965	0.378573	0.28357
AABR07029504.1	0	0	0	0	0	0.446248	0	0	0	0	0.418974	0
AABR07070872.1	0	0	0.266542	0.33803	0	0	0	0	0	0.243629	0	0.295409
LOC100910051	0	0	0	0	0	0	0	0	0	0	0	0
AABR07057648.1	0	0	0	0.186995	0	0	0	0	0	0.808641	0	0
AC103018.1	0	0	0	0	0	0	0	0	0	0	0	0
Sgk2	0.10538	0	0	0	0.0489474	0	0	0	0	0	0	0
C5	0.0575172	0.0218015	0.0219872	0.00697106	0.0320589	0.0219452	0.0214738	0.00719362	0.0248724	0.0100485	0	0.0121842
Gng2	3.12527	3.16965	3.53568	5.59983	5.82224	5.92987	9.55521	8.77884	7.88969	6.44872	6.12723	5.69003
Gtf2a1l	0.174001	0.0989309	0.532125	0.231977	0.0969845	0.199165	0.194887	0.108811	0.125406	0.151994	0.280489	0
Fgfr3	6.40091	6.41165	6.50299	7.73458	4.30343	7.66399	3.91116	4.36339	4.41933	7.89171	7.48823	7.91987
AC095650.2	2.12238	2.01119	3.83127	3.42976	2.40976	4.49876	3.08149	2.21204	1.86957	2.67794	3.16786	1.49866
Erh	101.201	92.1599	95.1869	189.54	251.326	187.568	199.067	208.795	199.215	182.951	181.453	186.482
Rn50_14_0459.2	0	0.0614906	0.0620143	0	0	0.0618957	0	0	0	0	0	0
Casp6	0.0885677	0.146873	0.0846424	0.228105	0.185122	0.232321	0.0826659	0.110771	0.111707	0.715637	0.277611	0.0938094
AABR07006580.2	0	0	0	0	0	0	0	0	0	0	0	0
Cfap157	1.80224	2.12672	1.59238	6.34687	5.08585	5.61132	7.90293	8.33573	7.71999	7.81212	6.73011	7.02333
Hsp90aa1	1.17791	1.45504	0.703563	3.02094	9.14468	10.3126	11.7991	5.05095	12.0823	12.3472	16.2565	3.63146
AABR07044281.1	0	0	0	0	0	0	0	0	0	0	0	0
AABR07031165.2	0	0	0	0	0	0	0	0	0	0	0	0
Mir194-2	0	0	0	0	0	0	0	0	0	0	0	0
Rell2	0.033417	0.0316662	0.0638718	0.344261	0.217303	0.223124	0.374282	0.668708	0.505772	0.350287	0.478828	0.601709
Wdr83os	93.4736	92.7985	101.757	129.104	192.927	131.485	115.676	113.836	107.279	122.716	121.495	134.736
Fam57b	3.064	3.77453	3.80667	4.60069	5.62946	5.68285	2.47852	3.15086	2.4782	4.19316	4.11598	4.47136
Gorasp1	12.8446	12.7936	12.9698	10.7241	9.79837	9.99379	11.5949	10.9638	11.4198	9.88927	11.5241	11.4201
Mrps18b	91.1614	98.4271	90.5909	117.184	151.921	123.694	93.7797	90.0766	100.174	119.758	114.438	113.026
Eif4ebp2	10.7466	11.2837	14.0108	9.56765	2.83475	9.11172	22.321	20.3892	19.3872	11.1548	12.357	11.4178
Ccdc112	1.4111	1.83242	1.72316	2.7554	2.23332	2.69196	4.29267	4.3631	4.10571	2.69353	2.80826	2.71244
Chn1	5.35906	6.03955	5.59712	6.36758	5.36955	6.57226	5.28778	5.4458	5.87637	6.85473	6.17058	6.71011
Slc26a10	95.6884	100.707	99.5049	103.404	51.9775	113.274	48.4901	51.735	53.0313	82.6029	91.0354	83.6689
Olr1679	0	0	0	0	0	0	0	0	0	0	0	0
RGD1563613	0	0	0	0	0	0	0	0	0	0	0	0
AABR07065349.1	0	0	0	0	0	0	0	0	0	0	0	0
Mir362	0	0	0.852935	0	0	0	0	0	0	0	0	0
Mroh1	22.7746	23.8981	25.0151	17.1543	12.1238	17.7085	16.5561	17.3111	18.7988	18.2404	19.2272	16.6463
Stk17b	4.97194	4.81241	4.42915	7.24192	6.61473	7.53718	15.1649	16.201	14.9223	8.28294	8.04657	7.89929
Dbil5	0.822863	1.07216	0.786394	0.37399	0.764412	0.588667	0.864035	0.578895	0.815453	0.808641	1.65807	0.544727
Atp5i	899.685	1011.38	922.734	968.65	1591.93	913.885	683.291	602.03	697.613	806.063	705.048	787.093
Pdk4	17.9236	18.4523	17.5874	14.8398	6.30385	14.8099	33.7682	36.9693	36.2287	18.5561	19.4864	18.3203
AABR07021213.1	1.65023	2.16522	1.6984	1.53852	1.06131	0.48433	1.65875	0.873198	0.731912	1.21974	0.795776	1.07563
#N/A	0	0	0	0	0	0	0	0	0	0	0	0
AABR07013698.1	0	0	0	0	0	0	0	0	0	0	0	0
Tulp2	0.697677	0.396675	0.500067	0.528489	0.259247	0.366014	0.553509	0.545361	0.351982	0.731327	0.374885	0.702019
Mir6333	0	0	0	0.316712	0	0	0	0	0.376671	0.45653	0	0
Mirlet7d	2.36783	7.29228	5.65722	7.53323	9.34845	5.08176	7.18266	6.29302	4.69301	8.79053	11.6629	0.626991
C1qtnf6	2.24928	1.96463	2.29913	4.4092	4.32437	4.51484	5.73227	6.29901	6.30117	4.06629	4.46661	5.26199
Ube3b	9.65619	9.25649	9.69231	5.76109	1.68301	5.96817	11.3662	11.855	11.4689	7.88021	8.41348	7.26026
Samt4	0	0	0	0	0	0	0	0	0	0	0	0
AC120292.1	2.7193	4.29473	3.46505	12.6339	1.6841	12.1045	9.30638	10.203	12.4125	11.0851	8.92939	9.60081
RGD1304929	0.348071	0.483759	0.310468	0.562481	0.452685	0.664017	1.27785	1.40756	1.30449	0.527018	0.602653	0.565295
Olr458	0	0	0	0	0	0	0	0	0	0	0	0
Rps18	483.219	482.143	477.643	809.436	1149.7	787	802.896	799.299	802.382	778.986	733.049	785.62
Zmynd12	0.424995	0.302047	0.507699	0.0965799	0	0.253364	0.545429	0.232548	0.344592	0.324839	0.190303	0.168805
AABR07073310.1	0	0	0	0	0	0.503043	0.492238	0.329795	0.760191	0	0	0
AABR07029675.1	0	0	0	0	0	0	0	0	0	0	0	0
AABR07071851.1	0	0	0	0	0	0	0	0	0	0	0	0
AABR07073270.2	2.00041	0	2.2941	1.45469	0	2.28971	0.373422	1.00076	0.576696	1.74741	1.07489	1.27128
AABR07028492.2	0	0	0	0	0	0	0	0	0	0	0	0
Vom2r53	0	0	0	0	0	0	0	0	0	0	0	0
LOC100910446	0.890877	0.496591	0.350574	0.412842	0.292092	4.89865	0.19565	0.229397	0.377692	0.366214	0.422381	0.721578
Tas2r129	0	0	0	0	0	0	0	0	0	0	0	0
Ndrg2	361.114	366.913	359.619	235.553	244.39	237.007	230.081	227.43	231.125	204.948	207.008	185.285
LOC102549993	0	0	0	0.0562481	0	0	0	0	0	0	0	0
Abra	15.5873	12.0306	13.6875	15.9074	19.4746	16.7642	14.4643	12.375	12.3413	19.6937	17.1558	18.7111
Anks4b	1.8467	2.08184	2.03871	2.18031	2.48455	2.27777	2.02082	1.83179	2.24886	1.61314	1.62531	1.61875
Sfxn3	13.0414	13.6366	15.2058	20.452	15.7555	21.4884	22.2461	21.1987	21.3914	20.0529	20.9614	19.5518
Kcnv1	0.0285	0	0	0.00863549	0	0.0135924	0	0.0267335	0	0.0124478	0	0
H1foo	0.050489	0	0	0.0611925	0.0938051	0.048159	0.188498	0.126292	0.109166	0.0441034	0.0904314	0.0534771
Mrgprb4	0	0	0	0	0	0	0	0	0	0	0	0
AABR07058366.1	0	0	0	0	0	0	0	0	0	0	0	0
Vipas39	12.593	12.6196	14.1114	13.0964	11.2427	13.1038	14.6541	14.7272	13.3362	13.6534	13.6211	11.5813
Lrrk2	3.82527	3.93479	3.94112	4.41647	2.4637	4.1574	8.10301	8.29236	8.87044	5.21717	5.61618	5.22649
#N/A	0	0.188262	0	0	0	0	0	0	0.286373	0	0	0
Sall2	1.2532	1.43585	1.45897	1.45674	0.814928	1.59745	1.59504	1.52462	1.44514	1.50273	1.4488	1.47217
AABR07024877.2	0	0	0	0.121644	0	0	0	0	0	0	0	0
Pald1	8.89489	8.46585	9.30226	11.1825	9.65835	11.1823	9.95897	10.649	9.93948	12.558	14.2372	13.1609
Lsm12	27.1362	26.3544	26.3554	34.8561	36.3535	30.1938	40.3794	41.4414	40.6501	35.8399	34.5112	35.0408
AABR07035506.1	0	0	0	0	0	0.117733	0	0.077186	0	0	0.442152	0.130734
Marcks	13.0596	12.8094	12.3614	23.1956	25.4371	23.2724	23.3943	23.2766	22.8557	19.094	21.676	23.211
AABR07033943.1	0	0	0	0	0	0	0	0	0	0	0	0
Zfp706	43.9008	43.8295	43.6952	44.6411	50.7196	45.855	53.0604	50.8738	52.5092	45.4616	44.0942	45.2937
Sbk3	0.394638	0.64108	0.32327	0.444136	0.209489	0.376427	0.157861	0.705101	0.284425	0.7387	0.454398	0.358281
AC123316.3	0	0	0	0	0	0	0	0	0	0	0	0
Rn60_20_0032.8	0	0	0	0	0	0	0	0	0.060771	0	0	0.0893098
Cerk	10.4096	9.86426	10.0381	14.8223	12.0909	14.6056	19.2815	19.932	19.6903	15.4524	15.8421	15.6209
Bahcc1	2.87607	2.75356	3.08951	2.46347	0.510881	2.30384	2.72604	2.72801	2.56562	2.37599	2.77534	2.40869
Sertad3	2.20745	2.67751	1.85646	3.58507	4.26535	3.57949	3.99709	4.85908	4.39106	4.08792	3.7561	4.91
AABR07063847.1	0	0	0	0	0	0	0	0	0	0	0	0
#N/A	0	0.43629	0	0	0	0.439165	0	0	0.331829	0	0	0
Tnfrsf19	0.508065	0.459564	0.441407	0.237913	0.171628	0.132169	0.4311	0.361041	0.23302	0.242077	0.186137	0.220146
Snx12	27.4421	26.8649	27.6722	41.8193	40.4886	40.9958	56.877	63.3751	59.2618	43.0516	46.9383	45.8434
AABR07070392.1	0	0	0	0	0	0	0	0	0	0	0	0
Wdr26	15.1604	15.6665	15.9092	18.1261	15.2697	18.3964	23.809	25.9508	24.4215	21.7083	20.677	21.1041
Tmc2	0	0	0	0	0	0	0	0	0	0	0	0
Timm10b	13.4009	12.0305	11.7116	17.0967	20.9667	15.0531	18.3505	16.3745	15.5677	14.6326	16.107	15.2212
Lyg1	0	0	0	0	0	0	0	0	0	0	0	0
Mmp1b	0	0	0	0	0	0	0.0440213	0	0	0	0	0
AC136866.1	0.483432	0	0	0	0	0.461123	0	0.302312	0	0	0	0
AABR07055309.1	0	0	0	0	0	0	0	0	0	0	0	0
Ndufs3	277.41	274.45	273.348	226.922	289.259	218.323	168.24	165.26	161.505	201.271	198.729	201.314
#N/A	0	0	0	0	0	0	0	0	0	0.164529	0	0
Rnasek	40.5491	41.2294	37.7148	42.3296	57.7404	42.8185	42.4513	39.1772	41.0994	38.1785	38.6112	41.1724
Grhl2	0	0	0	0.00970599	0	0.0152774	0.0298985	0.0200317	0.0115435	0	0	0.0169644
Hsf1	12.7074	12.2465	11.3407	13.9456	11.8717	14.206	14.9098	15.0367	15.4777	14.7093	17.3391	15.3422
Sgk3	1.59523	1.51165	1.78481	1.98057	1.33734	1.96696	4.86626	4.67154	5.18775	2.61701	2.1255	2.63748
Tceanc2	5.08024	4.84948	4.96218	7.65127	8.95292	5.80783	7.91448	8.54961	9.15361	7.43971	6.35611	6.4096
AABR07073367.1	0	0	0	0	0	0	0	0	0	0	0	0
AABR07051716.1	0	0	0	0.116023	0	0	0	0.119727	0	0	0.171461	0
Spsb1	6.09635	6.3259	5.45708	10.1971	8.17463	9.6303	14.9076	15.4218	14.8315	11.7832	11.5862	11.3657
Atxn7l3	10.4055	12.5265	11.2674	13.2339	4.23163	11.7144	20.6748	20.1076	19.8914	13.0686	15.0779	14.2852
LOC102549726	6.32576	10.015	6.11913	18.2788	24.2223	18.9845	20.1608	20.5508	21.072	20.4182	22.2458	19.1199
AC115277.2	0	0	0	0	0	0	0	0	0	0	0	0
Dnajc14	10.3931	11.515	11.0466	13.0035	14.8861	15.8126	22.1122	14.9261	14.9811	12.7205	13.1475	13.1429
AABR07071167.1	0	0	0	0	0	0	0	0	0	0	0	0
Vom1r20	0	0	0	0	0	0	0	0	0	0	0	0
RGD1561552	0	0	0	0	0	0	0	0	0	0	0	0
Rn60_4_1636.2	0	0	0	0	0	0	0	0	0	0	0	0
AABR07061465.1	0	0	0	0.0301243	0	0.0474162	0	0	0	0	0	0
Ehd2	128.187	131.777	126.937	170.017	95.0737	165.021	120.046	115.812	117.882	156.8	164.163	160.752
LOC100912217	0	0	0	0	0	0	0	0	0	0	0	0
Tac3	0.401188	0.456204	0	0.340367	0.149076	0.15307	0.074891	0.150529	0.231317	0.350448	0.215572	0.764877
Esd	67.5002	63.4514	59.8102	60.5978	66.5874	60.6337	60.3868	62.7784	60.8378	64.3313	63.5762	64.8298
Zfp422	10.1728	11.0962	10.0483	10.6293	9.56351	10.7039	12.455	13.9587	12.8526	11.0172	11.2513	11.9635
LOC690821	0	0	0	0	0	0	0	0	0	0	0	0
Zdhhc1	14.9489	16.1605	15.2411	12.4535	13.191	12.1491	9.99007	10.9323	9.41122	12.2791	13.1959	11.6013
LOC103693823	0	0.127251	0	0.244132	0.249496	0.12809	0.250677	0	0.0967835	0.234606	0	0.284468
Ins1	0	0	0	0	0	0	0	0	0	0	0	0
AABR07056926.1	0	0	0	0	0	0	0	0	0	0	0	0
Peg3	4.20904	4.52294	4.63376	3.80517	2.12114	3.52935	3.77451	3.26432	3.34087	3.13	3.40604	3.13236
#N/A	0	0	0	0	0	0	0	0	0	0	0	0
AABR07031932.1	0	0	0	0	0	0	0	0	0	0	0	0
Gprasp1	2.77765	2.8565	2.26289	2.76494	1.69203	2.38018	3.12807	3.29173	3.32777	2.64114	2.93611	2.59478
Tmcc1	16.8523	18.6239	16.5804	14.4289	5.03655	14.2646	21.4223	23.4786	21.6216	17.2863	16.7107	14.9785
Zfp40	1.18225	1.02373	0.974012	1.37112	0.871043	0.972149	1.25567	1.21095	0.969604	0.854671	1.00401	1.10109
AABR07017769.1	0	0	0	0	0	0	0	0	0	0	0	0
Olr869	0	0	0	0	0	0	0	0	0	0	0	0
Zbtb17	10.0422	10.918	10.4112	12.5515	12.5982	12.7646	10.8376	10.5552	10.5334	11.9246	12.2856	11.8237
Aspn	0.190203	1.98262	1.09064	1.8442	0.141354	0.399136	0.142023	0.142731	0.219334	0.232606	0.238472	0.120876
AABR07042863.1	0	0	0	0	0	0	0	0	0	0	0	0
AABR07052509.1	3.19331	1.00867	4.06905	2.58019	0.494413	2.53829	1.49026	1.6641	0	0.464907	0.953263	1.12743
Calcr	0	0.0316571	0	0	0	0	0	0	0	0	0	0
AY172581.12	0.853115	2.42526	1.63061	3.10192	0.792516	3.25498	2.3888	3.20095	1.22972	3.72609	1.52802	1.80721
#N/A	0	0	0	0	0	0	0	0	0	0	0	0
Tk2	3.59387	3.8658	3.55062	3.78186	5.41392	3.84494	4.57829	4.79852	5.37288	3.96659	4.58855	3.83228
Hivep1	3.53585	3.36797	3.2916	3.14747	1.35302	2.84843	4.30912	4.09575	4.10645	3.32871	3.71619	3.23089
Timeless	1.45778	1.43074	1.0822	3.13138	2.648	2.93	4.50712	5.04644	4.92495	4.07036	4.07976	3.55684
Sf3b3	11.0719	11.4557	11.664	15.6037	12.4622	14.5766	21.4614	22.7841	22.5662	17.9263	17.4906	18.0408
Abca13	0	0	0	0	0	0	0	0	0	0	0	0
Abhd14a	7.71076	8.48373	9.05054	6.46025	7.54763	6.6145	5.603	6.60178	6.15409	7.41363	6.16389	6.30347
Gtpbp3	3.98345	4.3388	3.98193	4.13426	2.97741	4.43289	4.25221	5.01069	5.13144	4.73952	5.12558	5.60135
Psmc5	101.431	94.1533	98.0544	103.391	121.548	102.249	90.8042	90.1584	93.9437	100.327	103.462	93.5989
LOC100361838	10.964	9.73199	9.68224	15.8955	15.9868	14.9589	9.9743	11.9768	10.5026	14.7903	13.7961	17.7868
Psd2	0	0.0250046	0	0	0	0	0.0123143	0.0082505	0.00950887	0.0115249	0	0
Mir181c	0	0	0.523026	0	0	0	0	0	0	0	0	0
AABR07055943.1	0.677586	0.296348	0.099624	0.663303	0.145259	0.248584	0.340542	0.586697	1.16453	0.546359	0.653495	0.662481
Snrnp200	14.0361	14.5532	14.5142	16.5208	11.1775	15.7472	22.811	23.4526	23.76	17.5943	17.534	17.6125
Sos1	5.1272	4.91672	5.17637	4.27023	2.93922	4.30539	5.4318	5.51917	5.35659	4.19547	4.63094	4.3538
AABR07004699.1	0	0	0	0	0	0	0	0	0	0	0	0
Cdca8	1.18548	0.760992	1.27912	4.63482	4.86689	3.17345	5.74656	5.71543	6.06348	4.77686	4.41787	5.14406
5S_rRNA	0	0	0	0	0	0	0	0	0	0.533419	0	0
Eml3	8.04723	9.20088	9.35145	13.1073	9.49367	13.5499	12.8886	14.3763	13.6963	12.3098	13.7368	13.1654
E2f3	1.7513	1.62498	1.95263	2.10046	0.982919	2.67973	5.07408	5.29331	4.75956	3.1871	2.712	3.40074
Mir106a	0	0	0	0	0	0	0	0	0	0	0	0
Ppbp	0.191458	0.0604759	0	0.116023	0	0.121749	0.0595668	0	0.0919923	0.0557479	0	0.0675964
Zc3h10	5.17214	3.73549	4.43526	6.81077	6.23318	5.46681	7.95884	7.32542	6.85087	7.15553	6.6099	7.13652
#N/A	0	0	0	0.227541	0	0.53723	0	0.117403	0	0.655985	0.168132	0
Cnga1	0.0282709	0	0	0	0	0	0	0.0530372	0	0	0	0
Txnrd2	26.3046	28.0878	26.8881	21.9876	22.7357	19.6276	22.2371	21.6003	20.9584	23.6998	22.8434	20.857
Olr105	0	0	0	0	0	0	0	0	0	0	0	0
Kctd5	5.41882	5.44613	4.81996	7.17886	7.49637	6.2204	9.45861	10.1366	9.94119	8.58583	8.44522	8.96955
Nhej1	2.01459	1.87008	1.96459	2.66591	2.74993	2.1177	2.37921	3.11096	2.40018	2.22668	2.83513	2.52574
AABR07067976.1	0	0	0	0	0	0	0	0	0	0	0	0
AC106663.1	0	0	0	0	0	0	0	0	0	0	0	0
AC096317.2	0	0	0	0	0	0	0	0	0	0	0	0
Prdm15	1.60288	1.46048	1.68334	2.08145	1.21085	2.41937	2.72909	2.75371	2.64053	2.43104	2.60277	2.07087
AABR07039313.1	0	0	0	0	0	0	0	0	0	0	0	0
RGD1359334	0.0481426	0.0912408	0.0460089	0.0291743	0.0894457	0.229605	0.134804	0.0301057	0.0346975	0	0.0431144	0.101984
Traf4	3.56061	3.73067	3.65179	5.03468	6.91118	5.55004	5.64698	5.7928	6.07128	6.47343	5.57378	6.71481
Ggnbp2	18.314	20.941	19.7529	20.6165	18.0483	21.0188	25.6895	27.7044	26.4593	22.5364	23.1425	23.273
Prdm12	0	0	0	0	0	0	0	0	0	0	0	0
#N/A	0	0	0	0	0	0	0	0	0	0	0	0
Scgb3a2	0	0	0	0	0	0	0	0	0	0	0	0
Adgrg1	28.0973	29.821	27.8373	33.7256	27.9844	32.6508	28.916	28.4974	29.154	37.6093	36.8834	36.4599
AC134063.1	0	0	0	0	0	0	0	0	0	0	0	0
#N/A	0	0	0	0	0	0	0	0.110602	0	0	0	0
Morc3	15.9307	14.7579	15.1888	16.0293	11.9021	16.7366	21.2166	23.0376	22.2727	19.1672	18.9439	18.3261
AABR07018128.2	0.420376	0	0.401745	0	0.390515	0	0	0	0	0	0	0.445255
Sepn1	31.9966	32.0673	30.6569	34.3854	12.5974	32.2004	41.7186	43.4253	42.6077	38.1135	37.8639	35.0619
Enpp2	6.30033	5.86514	5.80909	3.71044	1.81354	3.428	2.23625	2.35838	2.79802	2.24791	2.4834	2.44371
AABR07069969.2	0	0	0	0	0	0	0	0	0	0	0	0
AABR07021096.1	0	0	0	0	0	0	0	0	0	0	0	0
AABR07017770.1	0	0	0	0	0	0	0	0	0	0	0	0
LOC498933	0.687434	0.68761	0.510975	0.509158	0.283824	0.364284	0.926795	0.620943	1.2111	0.600492	0.85505	0.687668
Ust5r	0	0	0	0	0	0	0	0	0	0	0	0
AABR07043825.1	0	0	0	0	0	0	0	0	0	0	0	0
Cck	0.235104	0.33418	0.674052	0.605508	1.14662	0.728826	1.92008	2.24207	2.03334	0.359396	0.421097	0.871562
Rn50_5_0819.1	0	0	0	0	0	0	0	0	0	0	0	0
Cckbr	0	0	0	0	0	0	0	0	0	0	0	0.0370598
Trex1	17.7622	18.3961	19.1513	21.3897	26.496	21.0696	21.7329	21.7522	19.982	20.9363	20.4446	22.4314
AABR07010868.1	0	0	0	0	0	0	0	0	0	0	0	0
Bcl2	2.95226	4.19638	4.32617	2.74323	1.0056	2.44055	6.79698	8.18473	5.70949	2.70782	3.83367	3.96084
Zglp1	0	0.54904	0.138429	0.570557	0.740077	0.483574	0.675982	0.498192	0.782968	0.506116	0.6486	0.690395
AABR07059875.3	0	0	0	0	1.16521	0	0	0.196094	0	0.273918	0.842478	0.996408
Elfn2	0.202839	0.172991	0.213234	0.036876	0.018843	0.0386956	0.113593	0.0634221	0.0584762	0.159466	0.0363306	0.107422
Cpne6	0.512371	0.539476	0.979326	1.44898	1.11061	1.46618	1.48782	0.854424	1.29247	1.76541	1.55502	1.08539
Spx	0	0	0	0.0937469	0	0	0	0	0	0	0	0
Sass6	0.375308	0.177823	0.333054	0.666062	0.0498069	0.485841	0.700598	1.0729	0.8308	0.632265	0.672218	0.823433
AABR07031208.1	82.8838	29.0727	26.9694	45.2585	260.823	43.994	39.2225	41.9605	145.967	186.643	40.7545	80.1175
RGD1563680	0.666803	1.14144	0.904484	0.925477	0.719347	0.943789	1.3652	1.38546	1.28671	0.977045	0.635685	0.774614
AC131411.2	0	0	0.357682	0	0	0	0	0	0	0	0.33518	0
Scmh1	12.4575	13.7306	12.2585	8.79677	4.7075	9.31476	11.9476	12.1145	12.6497	8.73784	11.8182	10.6509
Btf3	247.114	259.574	253.395	409.783	544.311	407.259	445.46	454.766	452.562	420.632	407.442	417.802
AABR07008440.1	0	0	0	0	0	0	0	0	0	0	0	0
Rtn4rl1	5.17272	5.86374	5.84438	4.99495	4.13165	4.05788	4.60243	5.35092	5.52247	4.70854	4.65411	4.40357
Rn50_10_0892.1	0.43022	0.804634	0.530171	0.507704	0.2419	0.507559	0.792538	0.651351	0.726216	0.445037	0.506956	0.683523
Crabp2	0	0	0.159312	0	0	0	0	0	0	0	0	0
Slc45a2	0	0	0	0	0	0	0	0	0	0	0	0
AABR07052923.2	0	0	0	0	0	0	0	0	0	0	0	0
#N/A	29.4033	31.2515	27.7204	30.6403	30.3599	26.8146	23.9207	24.6612	24.7713	30.9776	25.7095	27.6714
Pcnx3	6.85239	7.55004	7.07696	9.49482	4.31164	9.55426	11.057	10.8826	11.9998	10.8809	11.6333	10.1752
Prkg2	0.0254605	0.0120633	0.0243321	0.00771452	0.011826	0.0364284	0.011882	0.00796081	0	0.0222404	0	0.0269674
AABR07044171.1	0	0	0	0	0	0	0	0	0	0	0	0
Spag4	0	0	0	0	0	0	0	0	0	0	0	0
AABR07039778.1	0.0566743	0.010741	0.0324975	0.0274756	0.0105297	0.0540589	0.0317387	0.0070882	0.0245079	0.0099013	0.020302	0.0120057
Triobp	13.035	13.4469	11.8338	16.4573	12.8414	16.0377	14.8559	15.9457	14.9785	16.4325	15.2645	16.657
Plod3	18.4161	19.6102	19.7571	36.3695	30.9237	35.5953	36.1697	37.7021	36.4283	36.9834	37.6894	36.4202
Etfa	362.305	354.571	361.043	261.956	296.7	245.048	245.564	257.33	244.385	257.732	257.068	265.458
Hyal4	0.0156408	0.0148214	0	0	0	0	0	0	0	0	0	0
Ccdc17	5.39327	7.41961	6.12229	6.38731	6.63783	8.8264	6.26041	7.07059	6.84674	7.82004	8.18888	7.45229
Npc1	3.68686	3.77064	3.86721	5.34036	3.17436	4.98559	9.86193	9.49638	10.2724	6.5295	6.41231	6.10761
AABR07057617.1	0	0	0	0	0	0	0	0	0	0	0	0
Atn1	0.342686	0.278342	1.2788	0.395556	0.0454777	0.171219	0.243696	0.26532	0.294026	0.783999	0.613789	0.829639
Mfhas1	4.7841	5.41593	4.92109	4.0721	1.15348	3.69247	7.07292	7.46787	6.86971	4.88086	4.7096	4.87384
Kcnh3	0	0.0147975	0	0.018926	0.0145063	0	0	0.0195302	0	0	0.0139846	0.066159
Cnot6l	4.76507	5.00757	4.71519	4.84681	3.16013	5.36257	8.38612	8.56595	8.10382	5.03573	5.30226	5.4184
AABR07027613.1	0	0	0	0	0	0	0	0	0	0	0	0
Gpc2	1.48862	2.18964	1.82608	2.77363	1.58928	3.34848	1.86639	2.19526	2.35394	3.08591	3.62138	3.67118
Atp6v1g3	0	0	0	0	0	0	0	0	0	0.0884378	0	0
Msn	113.732	114.007	107.895	268.2	172.623	258.787	405.666	409.14	402.702	304.907	310.171	297.074
AABR07017833.1	0	0	0	0	0	0	0	0	0.0757436	0	0	0
Ceacam18	0.204087	0.145046	0.0487606	0.309192	0.331783	0.0486673	0.380976	0.542407	0.551589	0.311982	0.182772	0.540415
AABR07058091.2	0.542701	0.378935	0.354864	0.276948	0.0796027	0.299696	0.266599	0.375099	0.288206	0.299408	0.511599	0.151268
Olr1341	0	0	0	0	0	0	0	0	0	0	0	0
AABR07024498.1	0	0	0	0	0	0	0	0	0	0	0	0
Olr1286	0	0	0	0	0	0	0	0	0	0	0	0
Rnf148	0	0	0	0	0	0	0	0	0	0	0.0546297	0.0646111
Olr197	0	0	0	0	0	0	0	0	0	0	0	0
AABR07035185.1	0	0	0	0	0	0	0	0	0.292381	0	0	0
Snx30	1.95097	1.84875	1.63986	2.07968	0.458554	2.1524	5.94555	5.43867	4.99761	2.73086	3.13654	2.41498
Pdcd4	22.1262	24.3126	24.173	23.9154	18.6676	22.789	24.5339	26.9321	25.881	23.0455	23.4102	21.899
AABR07034131.1	0	0.122981	0	0.157293	0	0	0	0	0	0	0.116226	0.137461
RSA-14-44	0	0	0	0.0512465	0.0392792	0	0	0	0	0	0	0
Eif2b4	26.1164	27.732	25.5962	30.9122	34.3444	31.2362	28.8711	27.3818	28.1406	29.7383	30.9527	30.2125
AABR07030265.2	0	0	0	0	0	0	0	0	0	0	0	0
Fam115e	0	0.0352614	0.0711235	0	0	0	0.0347314	0.0116348	0.0268188	0.0162524	0	0.0197066
Chd3	5.2097	5.20404	5.288	7.48045	3.79156	7.77836	10.4994	9.91365	10.1641	8.69581	8.07561	8.11009
AABR07020867.1	0	0	0	0.967571	0	0	0	0	0	0.464907	0.953263	0
Nynrin	3.25242	3.02275	2.75958	3.3102	0.86187	3.04266	2.99677	2.8683	2.74229	3.15067	2.90338	3.02533
Arf1	191.109	183.181	183.443	231.075	178.976	215.602	332.181	338.792	325.162	253.092	255.594	241.808
Gng3	2.01255	2.81299	2.64461	2.07333	2.19677	2.83153	2.77071	3.2722	3.62623	2.28542	1.75729	2.45141
Zfp518a	1.865	1.62948	1.55342	1.5242	0.961631	1.59941	2.29968	2.45559	2.41084	1.89068	1.60892	1.98444
Cacng1	0	0	0	0	0	0	0	0	0	0	0	0.0471929
Fbxl16	1.00715	1.14526	0.693009	0.952117	0.636214	0.922246	0.376015	0.47866	0.900087	1.12611	1.01019	0.597383
Olr46	0	0	0	0	0	0	0	0	0	0	0	0
#N/A	0	0	0	0.21436	0	0	0	0	0	0	0	0
AABR07066828.1	0	0	0	0	0	0	0.576023	0.38593	0.222396	0	0	0
Prr15	0.409978	0.582748	0.470169	0.86956	0.609369	0.508376	0.727051	0.615306	0.531865	0.573002	0.367158	0.564514
#N/A	0.205716	0.389876	0.393197	0.249327	0.382206	0.588667	0.192008	0.77186	0.593056	0.359396	0.18423	0.217891
Ccr6	0.0814773	0.27023	0.0778662	0.1975	0.0378448	0.155435	0.038024	0.127379	0.352336	0.0355863	0.218902	0.0862994
Ube2d4l1	0	0	0	0	0	0	0	0	0	0	0	0
AC125248.1	0.0130628	0.0123784	0.0249677	0.0554122	0.0364047	0.0249199	0	0.0245063	0.0376586	0.0570534	0	0.0691794
Scaper	3.44679	3.12012	3.42032	2.51584	1.11506	2.21633	3.37129	3.35366	3.19849	2.46256	2.57397	2.64769
Dmpk	201.882	216.565	205.652	158.66	125.5	169.591	138.709	143.124	142.008	174.835	183.696	163.072
AABR07058483.1	0	0	0	0	0	0	0	0	0	0	0	0
AABR07072078.1	0.0724243	0.27452	0.346072	0.263334	0.134559	0.483574	0.540786	0.226451	0.156594	0.56938	0.38916	0.306842
Igdcc3	0.237851	0.112695	0.159117	0.0288275	0.0662867	0.0680624	0.133201	0.0594956	0.0685699	0.0415538	0.127805	0.151157
AABR07062672.2	0	0	0	0	0	0	0	0	0	0	0	0
Olr1516	0	0	0	0	0	0	0	0	0	0	0	0
Krcc1	37.3319	35.9554	33.0307	37.4653	36.8517	35.7806	49.1109	52.5607	46.2689	37.8883	39.6491	41.7126
Coa5	60.7107	60.9543	61.8174	36.936	34.892	37.1425	57.0571	55.1241	55.1241	41.8994	41.479	40.1323
AABR07065387.1	0	0	0.256968	0	0	0	0.0156855	0	0.012112	0.0146798	0	0
AC106702.1	0	0	0	0	0	0.570461	0	0	0	0	0	0
AABR07071287.1	0	0	0	0	0	0	0	0	0	0	0	0
LOC102552166	0.752702	0.611373	0.582325	0.575601	0.0166485	0.444456	0.986909	0.840533	1.34331	0.57923	0.722236	0.607428
Igf2r	24.916	26.6386	25.1808	24.5449	13.4559	23.8354	42.8757	43.0317	45.0746	29.8097	30.6266	29.2576
Cyb5r4	9.5255	9.54436	8.87947	12.4123	12.959	12.8097	17.8787	18.5375	15.9814	12.5039	13.9147	13.4523
AABR07044106.1	0	0	0.840011	0	0	0	0	0	0	0	0	0
AABR07048571.1	0	0	0	0	0	0	0	0	0	0	0	0
#N/A	0	0	0	0	0	0	0	0	0	0	0	0
AABR07021910.1	0.596523	0.235529	0.237535	0.240995	0.253985	0.237081	0.162392	0.217602	0.429928	0.217116	0.356146	0.447544
Vamp7	11.9074	12.9511	10.5388	14.3606	10.8981	14.7149	20.2569	20.3946	21.5605	12.3997	11.3466	12.6121
Rps29	7.12426	8.3584	4.53901	10.896	18.594	7.76628	6.33289	7.63735	5.13462	10.0757	7.89926	16.8884
Psenen	166.839	179.901	163.717	157.008	220.832	153.731	140.963	133.585	138.399	144.309	144.823	142.063
AABR07064231.1	0	0	0	0	0	0	0	0	0	0	0	0
Tctex1d2	3.67912	2.80155	3.26491	4.29983	4.27222	3.50934	4.10849	4.14951	4.64035	4.47637	4.53043	5.01025
AABR07044988.2	0	0	0	0	0	0	0	0	0	0	0	0
Mks1	1.03551	1.51648	1.48442	1.58305	1.00567	1.48158	1.58155	1.70717	1.6792	1.23346	1.39103	1.24635
Klhl29	0.164107	0.233264	0.313668	0.306633	0.139746	0.365246	0.255286	0.453254	0.344971	0.334487	0.391912	0.289699
Oip5	0.596304	0.887957	0.325643	1.08408	0.633081	0.975061	1.82873	2.45046	1.59629	1.04177	0.991757	1.80456
Sec24c	20.0489	19.8694	19.7549	25.9015	20.1878	25.3005	29.178	29.151	30.7337	27.3815	27.8441	25.9079
#N/A	0.20143	0.190877	0	0	0	0	0	0.125963	0	0	0.180392	0
Plxnb1	13.5824	15.3632	14.5957	8.82666	2.19506	9.51721	11.1158	11.6107	12.2131	10.3805	11.8317	9.53601
Zdhhc4	19.5176	18.7711	18.8912	19.7464	27.8347	18.8551	18.3336	16.3691	18.7457	17.6308	19.4171	17.6754
Pptc7	32.1265	31.5246	33.2907	22.4676	16.9463	21.5701	27.5863	27.8786	27.0678	23.9925	24.0928	22.4814
Serpinb10	0.228094	0.144096	0.145323	0.668085	1.1654	0.471397	2.44829	1.9256	2.2193	0.232453	0.612812	0.523452
AABR07035819.2	0	0	0.684454	0.434013	0	0.683145	0.668471	0.895739	0	0	0	0
AABR07021972.2	0.197993	0.18762	0.378435	0.419941	0	0.0944279	0.831597	0.99051	1.07023	0.345903	0.177313	0.314566
AABR07047309.2	0	0	0	0	0	0	0	0	0	0	0	0
Olr161	0	0	0	0	0	0	0	0	0	0	0	0
Olfml3	5.67579	6.53542	6.21264	10.3985	10.8518	8.9077	12.5664	12.0512	12.1055	11.5878	11.88	11.5341
Mir136	0	0	0	0	0	0	0	0	0	0	0	0
Olr16	0	0	0	0	0	0	0	0	0	0	0	0
Spint4	0	0	0	0	0	0	0	0	0	0	0	0
AABR07004097.1	0	0	0	0	0	0	0	0	0	0	0	0
Olr83	0	0	0	0	0	0	0	0	0	0	0	0
AABR07002896.1	0	0	0	0	0	0	0	0	0	0	0	0
Als2cr12	0.314087	0.535737	0.1801	0.304538	0.11671	0.119837	0.527684	0.176771	0.22637	0.356672	0.47818	0.199605
Hhatl	65.5786	62.4118	62.1901	39.8934	43.8451	41.3507	28.6622	28.0164	31.2897	40.7051	46.0234	40.5738
AABR07069872.1	0	0	0	0	0	0	0	0	0	0	0	0
AC120246.2	25.0201	25.2051	25.0049	44.1232	62.9096	43.5902	39.8545	42.9406	39.592	45.3316	44.4957	47.1916
Fv1	5.02025	6.00097	5.55035	9.64379	8.29093	10.6413	10.6577	12.3524	10.4526	9.9458	9.844	9.69638
AABR07043445.1	0	0	0	0	0	0	0	0	0	0	0	0
LOC684471	0.185341	0.234175	0.0590423	0.0748777	0.057392	0.235718	0	0.115902	0.178106	0.0539668	0.0553278	0
LOC500584	3.13956	3.03192	2.82841	3.25981	3.13947	4.21543	3.95691	4.46434	4.74169	4.08753	3.7608	4.32086
AABR07070269.1	0	0	0	0	0	0	0	0	0	0	0	0
Qrsl1	7.3792	9.60138	9.00505	6.1401	5.80041	6.79502	6.51662	5.73269	6.46385	5.40466	6.27806	7.39506
RGD1561812	0	0	0	0	0	0	0	0	0	0	0	0.0584079
Tppp2	0	0.168112	0.0847718	0.26877	0	0.169219	0	0.11094	0.0639304	0.154969	0	0
Akap1	48.3918	46.4303	48.9902	38.5116	29.4766	38.2445	37.5277	41.0593	39.5478	36.6692	38.3772	39.4513
AABR07071368.1	1.18391	0.560945	0	0	0	0	0.552512	0.370178	0	0	0	1.25398
AC094348.4	0	0	0	0	0	1.04405	0	0.34224	0.394438	0	0	0
AABR07012991.1	0	0.419638	0	0	0.411382	0.422403	0	0	0	0	0	0
Sumo3	31.8714	33.6002	32.4376	50.0327	53.6506	47.9638	55.6991	52.8786	56.3069	45.5395	49.3039	52.4771
AABR07065352.1	0	0.163609	0.495007	0	0	0.164687	0	0	0.124436	0.452454	0	0
AABR07037112.1	1.13749	2.15579	1.08707	2.06795	0.528344	2.16999	2.12338	3.55661	1.63963	1.98725	2.03737	1.80721
AC117091.3	0	0	0	0.520816	0	0	0	0	0	0	0	0
Olr470	0	0	0	0	0	0	0	0	0	0	0	0
AC107597.2	0	0	0	0.0290778	0	0	0	0	0	0	0	0
Ano4	0.63816	0.475143	0.580835	0.423555	0.22584	0.507259	0.269455	0.370566	0.503741	0.583995	0.489864	0.595461
Rps27a	610.417	602.131	563.471	975.087	1430	781.383	925.314	1030.56	951.699	840.815	870.072	974.512
AABR07048762.1	0	0	0	0	0	0	0	0	0	0	0	0
AABR07044630.1	0.585978	0.555279	0	0	0	0.558937	0.546931	0.366439	0.422328	0.511867	1.04955	0
Ipo11	3.58244	3.00089	4.0857	3.86214	2.04091	3.436	7.57419	8.04515	7.71732	4.52979	4.59085	5.0523
Myo7b	0.175262	0.224208	0.133996	0.143382	0.0732658	0.117022	0.0817918	0.109599	0.12	0.244954	0.337458	0.129944
RGD1562399	66.5547	58.832	59.7127	136.587	136.573	119.102	102.359	98.0857	91.7826	114.886	122.143	123.627
Anxa1	39.4808	39.1218	37.3392	68.4717	84.588	67.8486	93.1774	107.422	94.5833	66.3249	65.6111	70.0866
#N/A	0	0	0	0	0	0	0	0	0	0	0	0
NEWGENE_1310139	0.332576	0.386778	0.339507	0.513012	0.0561731	0.468633	0.677268	0.534117	0.577448	0.396155	0.45353	0.592435
AABR07028186.1	0	0	0	0	0	0	0	0	0	0	0	0
AABR07009638.2	1.82427	0.345739	0	0	0	0	0	0.45632	0.262959	0.31871	0.326747	0
Suz12	7.18191	6.37873	7.77538	6.76121	3.34819	7.15383	14.5445	14.1033	14.2679	8.61171	8.9713	8.92625
AABR07057077.1	0	0	0	0	0	0	0	0	0	0	0	0
Rasal2	6.90828	7.79128	7.63192	5.75184	1.13816	5.11107	10.6501	9.79398	10.2558	6.89848	6.9667	6.73864
Tlr9	0.214198	0.236805	0.324115	0.205522	0.0663275	0.204313	0.366528	0.401842	0.334484	0.187107	0.287739	0.170156
AC105662.1	1.08824	0.951906	1.36002	1.47114	1.322	1.59696	0.78133	0.837574	0.965321	1.38935	1.19949	1.50731
Echdc2	24.5403	27.2094	26.5637	19.525	22.4094	18.2326	16.3218	15.5549	16.2429	19.4679	18.8749	17.5494
Rn50_X_0740.2	0	0	0	0	0	0	0	0	0	0	0	0
AABR07071886.1	0	0	0	0	0	0	0	0	0	0	0	0
AABR07041632.1	0	0	0	0	0	0	0	0	0	0	0	0
Gjb4	0	0	0.0418421	0	0	0	0	0.0136896	0.0315551	0	0	0
Mrps12	31.2247	33.6411	30.1493	45.2273	61.1615	42.0205	35.4699	33.6537	35.5883	37.8476	40.5362	37.773
Sorbs3	23.2986	27.8779	24.8704	22.9178	14.8787	24.7589	23.5391	21.4703	22.9418	23.7861	27.7869	23.2578
Zdhhc8	7.35482	8.34055	7.9836	9.91607	5.39231	9.66058	7.89364	9.20938	9.32294	8.7718	10.0574	10.1071
AABR07012100.2	0	0	1.58402	0.502215	0	1.58099	0	0.518249	3.58376	3.61963	0.742183	3.51115
Btnl7	0	0	0	0	0	0	0	0	0	0	0	0
Bicd1	0.476541	0.41173	0.562578	0.603047	0.195305	0.548133	0.915736	1.04301	0.777822	0.501974	0.514633	0.875879
Rn50_X_0745.4	0.911521	1.29565	1.27557	1.26258	0.695564	3.16731	0.455776	0.5293	1.64239	0.767801	1.48687	0.896506
LOC102551435	2.02132	3.06467	2.31808	6.46143	9.6234	6.07332	8.48982	8.15294	6.99269	7.45997	8.59846	7.11865
Vav3	1.65677	1.51139	1.32339	1.92559	1.11412	1.9695	3.83132	3.78083	3.57332	2.14925	2.04844	2.00365
AABR07027672.1	0	0	0	0	0	0	0	0	0	0	0	0
Lin52	12.0365	12.5278	12.2573	10.2835	5.13248	6.39926	14.7337	12.2159	14.079	9.13526	10.2492	12.1218
Ceacam3	0	0	0	0	0	0	0	0	0	0	0	0
Baat	0.068129	0.0322798	0	0.0412861	0.158224	0	0.0317946	0.0852083	0.0736532	0.0892687	0.0305067	0
Cecr6	0.13499	0.0959382	0.0322517	0.0409018	0.0313502	0	0.125995	0.0422076	0.0486451	0.0884378	0.120891	0.0357447
AABR07049688.1	0.0450752	0	0.086155	0	0	0	0	0	0	0.0787488	0.0403674	0.0477429
AC128059.3	0	0	0	0	0	0	0	0	0	0	0.494789	0
AABR07070982.2	0	0	0	0	0	0	0	0	0	0	0	0
AC110623.1	0	0	0	0	0	0	0	0	0	0	0	0
rno-mir-6317-1	0	0	0	0	0	0	0	0	0	0	0	0
Olr516	0	0	0	0	0	0	0	0	0	0	0	0
Mir349	0	0	0	0	0	2.85231	0.558208	0.373994	2.15518	2.61211	0.535596	1.26691
Ttc5	8.1117	9.98997	9.79518	9.58291	9.71182	9.52506	10.3591	10.2917	9.83528	8.95315	9.67723	9.30517
AABR07017781.1	0	0	0	0	0	0	0	0	0	0	0	0
AABR07043861.1	0	0	0	0	0	0	0	0	0	0	0	0
AABR07058479.1	4.36648	4.35938	4.54555	3.68561	2.68007	3.71873	4.43941	5.46112	6.63123	5.17646	4.53889	3.71644
Csrnp2	3.28104	3.64145	3.42844	4.13908	2.66846	3.93335	2.836	2.66652	2.98121	4.10395	3.94448	3.31295
Rbm19	2.18811	2.09907	2.16858	3.33134	1.54333	3.69757	6.53032	5.74357	5.76293	3.81094	4.34251	4.20602
AABR07052758.1	4.09322	3.68344	2.53283	7.69129	3.80247	3.59535	1.92398	1.52844	1.76156	3.21541	4.77333	3.11904
Lhx1	0	0	0	0	0.0849124	0	0	0	0	0	0	0
AABR07029161.1	0	0	0	0	0	0	0	0	0.522631	0	0	0
AABR07013949.1	0	0	0	0	0	0	0	0	0	0	0	0
Ccdc68	1.30222	0.87574	1.24451	0.305475	0.546325	0.520892	0.548911	0.7618	0.423857	0.25686	0.338577	0.400439
AABR07014962.1	0	0	0	0	0	0	0	0	0	0	0	0
Acer2	3.97095	3.54971	3.70895	5.11272	4.10688	4.59245	4.06333	4.14338	3.86729	4.58894	4.614	5.23064
AABR07068650.1	0	0.111506	0.0374853	0.047539	0	0.112241	0.03661	0.14717	0.169617	0.0342629	0.070254	0
AABR07011809.1	0	0	0	0	0	0	0	0	0	0	0	0.469047
Pcdhb5	0.336886	0.510779	0.536593	0.653288	0.33382	0.556989	0.691763	0.547743	0.793153	0.333516	0.422381	0.404401
Myh6	1390	1360.84	1394.6	1115.03	985.559	1062.84	699.993	677.548	767.46	1226.11	1196.9	1004.21
AABR07035791.1	0	0	0	0	0.0332046	0	0	0	0	0	0	0
AABR07010085.1	0.405677	0.512565	0.646163	0.327786	0	0.128985	0.631074	0.169126	0.194921	0.118123	0.605511	0.572915
AABR07071223.1	0	0	0	0.279009	0	0	0	0	0	0	0	0
AABR07026663.1	0	0	0	0	0	0	0	0	0	0	0	0
Clnk	0.964854	0.609537	0.499466	0.438525	0.485505	0.651899	1.01313	0.678788	0.956165	0.526765	0.54005	0.468397
LOC100912210	0.309396	0.146594	0.147842	0.374987	0.431128	0	0.14439	0.0967398	0	0.135133	0.415623	0.491561
l7Rn6	38.3745	32.8449	32.4256	39.315	46.73	38.6967	48.8419	48.7687	46.7174	46.0055	41.018	42.3143
Tbx10	1.3452	1.11539	0.642791	0.611393	0.728961	1.12273	0.732412	0.455658	0.525156	0.636496	1.2047	0.534306
Tmem263	9.06568	9.4377	8.33848	10.317	6.16802	10.2306	18.3533	16.8478	15.2763	10.1127	10.7107	9.96286
Olr781	0	0	0	0	0	0	0	0	0	0	0	0
LOC103691013	0.0255446	0.0968253	0.0732374	0.0774	0	0.0974632	0.0476849	0.079871	0.092053	0.0446278	0	0.324677
Mepe	0.176328	0.100254	0.0674052	0.128225	0.131042	0.0672763	0.0329156	0.0441063	0.0254167	0.215638	0.0947468	0.0373527
Robo3	0.0612585	0.0386995	0.0487863	0.0866193	0.161237	0.0876474	0.0571765	0.0957693	0.036792	0.0356739	0.0274302	0.064884
AC130862.3	0.547281	0	0	0.198991	0	0.313215	0	0.205344	0	0	0	0
Olr1693	0	0	0	0	0	0	0	0	0	0	0	0
Setd1a	5.56592	6.51587	6.39771	8.20053	3.95343	8.90318	10.0152	10.723	10.2424	9.54017	9.12986	9.0861
#N/A	0	0	0	0	0	0	0	0	0	0	0	0
Spata31d1b	0	0	0	0	0	0	0	0	0.0210526	0	0	0
AABR07024491.1	0.557806	0.264291	0.533084	0.0845074	0.129546	0.133016	0.130159	0.0872053	0.301518	0.365444	0	0
Mir223	0	0.999501	0.504007	2.87632	4.40927	2.01217	8.86029	13.1918	7.60191	2.3034	1.88919	0.558592
Plekhm1	4.16963	4.4904	4.64116	5.23194	3.29927	5.17506	6.52904	6.82234	6.72447	5.74195	6.08884	6.00631
Mpzl2	0.0891119	0.0675546	0.119227	0.226807	0.314571	0.305999	1.46386	1.47116	1.36157	0.420344	0.223453	0.377543
AABR07005028.2	0	0	0.518138	0	1.00731	1.03429	0	0.678083	0.781504	0.947193	0	0.574254
Olr1595	0	0	0	0	0	0	0	0.0382673	0.132312	0	0	0
LOC102550519	0	0	0	0	0	0	0	0	0	0	0	0
Olr323	0	0	0	0	0	0	0	0	0	0	0	0
Gtf3c4	3.49723	3.64141	3.63216	3.72795	2.25459	4.0432	5.50586	5.5175	5.58769	4.5787	4.61115	4.36471
Tmem102	0	0	0	0	0	0	0	0	0	0	0	0
Eda	0.951989	1.71966	1.13725	0.91944	0.359274	0.851304	1.3606	1.71155	1.41512	1.22139	1.01241	1.00833
Map2k3	0.0751449	0.047472	0.0718144	0.0910753	0.0930761	0.167247	0.0467584	0.0313277	0	0.0437607	0.336482	0.159184
Pcca	59.89	58.3567	56.3509	34.9467	28.0882	34.3666	35.7518	37.7828	36.0909	37.0183	37.8334	35.4437
Slc25a3	1144.42	1148.48	1130.21	949.161	1172.19	898.226	813.998	819.279	823.79	928.363	910.483	915.851
AABR07060055.1	0	0	0	0	0	0	0	0	0	0	0	0
Sdc1	2.25087	2.36595	2.18726	10.7746	11.4389	10.1576	29.1651	28.7546	28.6552	12.3424	12.2979	13.9639
Smarcal1	2.383	2.9627	2.0952	3.41962	2.79816	3.45501	3.64771	3.92221	3.61359	3.36389	3.89262	3.27115
Wdr3	5.69608	4.69082	5.16821	6.98581	5.85841	7.84259	10.2058	10.421	10.6053	8.73704	9.07884	8.29563
AABR07058240.1	0	0	0	0	0	0	0	0	0	0	0	0
Slc19a2	6.40319	7.07902	6.64243	5.70441	4.27061	6.62973	6.30854	6.74213	6.48851	5.97581	6.29806	6.20248
Klf5	1.21491	1.17524	1.28201	1.33442	0.799431	1.64169	1.7718	1.75689	1.78771	1.74665	1.60936	1.60851
Wdr70	4.75507	4.4802	5.06367	7.16274	7.623	6.55723	7.70981	7.51036	6.67793	7.28673	7.49483	7.07986
Itm2c	122.094	122.851	118.905	104.825	107.726	94.5386	108.997	109.795	113.134	94.069	93.6557	96.4379
Map1a	11.4832	12.6995	11.6011	11.3871	7.6008	10.5988	17.9569	17.7046	19.6092	14.8864	15.9422	14.5595
AABR07039498.1	0	0	0	0	0	0	0	0	0	0	0	0
AABR07069633.1	0	0	0	0	0	0	0.129536	0	0	0	0	0
AABR07047086.1	0	0	0	0	0	0	0	0	0	0	0	0
AC099294.7	17.0352	22.2508	22.4403	41.5723	48.3309	51.8214	54.1462	58.447	54.42	61.9359	51.5405	51.2043
Dynlt3	20.5002	19.4775	20.1086	18.0938	19.9736	18.5481	19.9672	23.407	20.0378	18.2855	17.3418	17.2447
Rhcg	0	0	0	0	0.0278363	0.028582	0	0	0	0.026175	0.0268351	0
Thumpd2	3.47079	4.19929	4.23506	3.9249	3.39698	3.69489	3.67338	4.49592	3.9309	3.78978	3.71885	4.20138
Gabrg2	0	0	0	0	0	0	0	0	0	0	0	0
AABR07053596.1	0	0	0	0	0	0	0	0	0	0	0	0
Map3k8	3.73363	3.84237	4.37387	4.05074	3.44977	4.55698	4.64646	5.62363	5.4397	5.19023	4.62003	4.57118
Rab32	3.30368	2.8924	3.22589	6.75683	6.50496	6.52508	15.3674	16.1233	15.9167	7.5283	8.05582	8.12042
AABR07053580.1	0.0673773	0.0638474	0.128782	0.163322	0	0	0	0.126402	0.194241	0.176567	0.362041	0.356824
Cdr2	3.50689	3.39337	3.63468	9.3238	7.54796	9.04578	11.1566	12.1234	11.4093	9.36266	9.51031	10.2801
Zfp692	7.62847	8.57371	8.59021	12.9368	10.1355	13.4247	12.3361	11.4083	12.7861	13.7148	14.246	14.4374
Jund	99.7845	97.5362	90.5081	138.82	167.226	136.673	101.036	102.177	100.654	132.195	134.879	132.332
Ift172	13.2426	14.3319	13.5379	11.1016	8.93787	11.8865	12.5921	12.2553	12.3333	12.6842	11.7959	11.8453
Tmem81	0.746933	0.876326	0.781813	1.18549	1.12342	0.644611	0.829954	1.22333	0.922855	0.683536	0.923747	0.866486
Rn50_5_0814.30	0	0	0	0	0	0	0	0	0	0	0	0
Rn50_10_0701.3	0.181628	0.13769	0.173578	0.154092	0.134981	0.0346492	0.305144	0.181728	0.183264	0.349044	0.162658	0.153901
Mrpl32	33.387	30.1347	30.7523	36.4825	43.1549	32.7109	32.7133	29.192	32.1745	33.7832	32.5382	34.9629
LOC100362176	2.49513	2.14275	1.78841	2.36257	2.17303	2.90061	0.800549	1.36528	2.13548	2.17956	2.58368	2.14728
LOC103691939	25.4066	27.3748	19.2896	51.2643	44.3192	48.2889	60.2942	53.1363	56.9002	58.0315	38.006	43.4053
AC091229.1	0	0	0	0	0	0	0	0	0	0	0.418974	0
Plcb2	0.83294	0.773826	0.842849	1.7914	0.986182	1.77595	3.82621	3.25802	3.54306	2.32545	2.06232	1.86826
LOC100362040	0.1311	0.15529	0	0.11917	0	0.0937877	0.244729	0.102479	0.14173	0.171779	0.176111	0.0694296
AABR07040690.1	0.0994204	0.0942118	0.0950141	0.0903729	0.0923583	0.0948325	0.278387	0.124344	0.214964	0	0.178073	0.105304
LOC102555672	2.3734	2.36848	2.66967	1.97286	1.61946	2.24384	1.98	1.95704	1.86194	2.12827	2.27599	2.0022
AABR07033206.1	0	0	0	0	0	0	0	0	0	0	0	0
AABR07034610.1	0	0	0	0	0	0	0	0	0	0	0	0
Desi1	12.6184	10.2103	10.6888	14.3004	11.037	15.3968	19.4253	20.137	18.9269	16.1043	14.8227	16.7933
Mtmr6	12.6436	12.873	11.8076	13.8339	10.124	12.4945	18.9271	19.7618	18.4876	14.3725	15.1699	14.9674
AABR07066866.1	0	0	0	0.211778	0	0	0	0	0	0	0	0
Ptprn	1.58915	1.21688	0.905092	7.4026	5.69629	7.28814	10.8772	11.2627	11.5575	8.70755	10.0341	9.07906
Nr4a3	0.699733	0.675585	0.630869	0.600053	0.220764	0.46595	0.887238	0.759564	0.94202	0.518973	0.520238	0.363581
LOC102551100	0	0	0	0	0	0	0	0	0	0	0	0
LOC102552055	0.357216	0.236951	0.170692	0.173178	0.165921	0.170366	0.26673	0.245721	0.33469	0.218426	0.255925	0.378357
Gpr88	0.474706	0.529219	0.72053	0.888395	0.492866	0.639246	0.794926	0.7596	0.825141	0.500041	0.675199	0.635895
Srsf7	47.1933	50.1605	46.2094	69.7415	70.0943	69.7081	85.4181	87.2591	85.3316	74.8792	77.4102	77.6395
Pex11b	8.25204	7.85881	8.24119	9.42636	9.04572	8.54028	12.0539	11.8689	11.9246	11.4253	10.3093	9.92038
AABR07018950.1	0	0	0	0	0	0	0	0	0	0	0	0
Clstn2	1.5929	1.83582	1.64574	0.900074	0.29995	0.533842	1.56713	1.33264	1.89272	0.996574	0.61688	0.797989
Fpr-rs4	0	0	0	0	0	0	0	0	0	0	0	0
Rassf9	2.10094	2.22575	2.03038	1.81676	1.04164	1.80133	1.36605	1.59429	1.71836	1.73212	1.50098	1.37517
AABR07063743.2	0	0.0156751	0.0158086	0	0.0153667	0	0.0463184	0.0413772	0.0953761	0.0144496	0.0444421	0.0876036
Tmem27	0	0	0	0	0	0	0	0	0	0	0.0394179	0.04662
Rn50_14_1002.4	0	0	0	0	0	0	0	0	0	0	0	0
Rer1	31.1554	33.2026	33.3086	45.4355	58.8293	43.9151	45.5605	51.8001	47.574	43.4471	44.0047	48.7644
Tdrd5	0.0698938	0.264928	0.183689	0.0529444	0.194787	0.0500013	0.0652364	0.109269	0.0629676	0.106845	0.281672	0.111045
Siva1	8.95806	8.26178	7.92011	16.518	19.8031	15.2159	16.7223	17.6744	16.158	17.1148	17.4606	19.3824
LOC102548682	0.371871	0.176194	0.355389	0.901412	0.863639	0.177355	0.173545	0.348821	0.134008	0.162419	0.333031	0.393879
RGD1564534	0	0.0222381	0	0	0	0	0	0	0	0	0.0630495	0
Mcmbp	7.07519	6.4595	6.17755	10.6263	7.77359	10.7172	15.7744	16.9481	16.0093	11.2109	10.3779	12.8716
AABR07020696.1	0	0	0	0	0	0	0	0	0	0	0	0
AABR07026509.1	0.0787135	0.198906	0.501499	0.190801	0	0.350378	0.0979578	0.393785	0.151282	0.320872	0.469949	0.277907
Igkv11-125	0	0	0	0	0	0	0.186069	0	0	0	0	0
Cdc37l1	23.564	22.2894	22.762	20.1069	12.1525	18.9489	25.9389	26.0087	26.5637	23.0944	23.8661	23.4812
Napb	1.92714	0.983326	1.1806	1.07801	0.0459038	1.2726	1.42975	1.54504	1.35332	1.51075	1.77011	1.15144
AABR07007978.1	0	0	0	0	0	0	0	0	0	0	0	0
Rpgr	1.3476	1.17401	1.10092	1.00104	0.928808	0.850028	1.13608	1.18252	1.31588	0.968309	0.973264	0.851806
AABR07032821.2	0	0	0	0	0	0	0	0	0	0	0	0
Dhrs7	21.7039	22.781	21.1714	22.4383	28.01	21.6881	22.858	25.4869	21.5692	24.4935	23.743	23.1788
5S_rRNA	0	0	0	0	0	0	0	0	0	0	0	0
LOC686837	0	0	0	0	0	0	0	0	0	0	0	0
Vps16	7.69499	8.38458	8.96462	11.7184	11.8659	11.8454	11.8186	13.0216	12.7381	11.274	12.1342	11.5092
Atp10a	0.898967	0.808737	0.815625	1.52398	0.835111	1.58471	3.11197	2.98872	2.81306	1.60036	1.39614	1.83203
Vps26b	20.5377	20.1228	21.0073	18.0986	14.1208	17.5474	23.0757	24.1444	23.7698	20.3351	21.7632	20.7395
AABR07062528.1	0	0	0	0.211778	0	0	0	0	0	0	0	0
Agpat2	13.2583	14.1032	12.5706	14.4812	13.3876	11.7967	14.2336	13.731	13.7858	16.8458	16.3321	15.9302
Mpc1	477.994	461.362	470.342	389.751	430.462	381.492	271.523	292.056	268.405	337.908	350.112	388.162
Tdrd3	6.41521	6.68703	5.69297	6.18315	5.87438	6.70194	7.12825	7.66048	7.83809	7.07153	6.42913	7.08609
AC121413.2	0	0	0	0	0	0	0	0	0	0	0	0
Adrm1	58.1326	61.2672	57.0566	79.288	81.9398	76.6469	73.2721	72.5045	70.8834	80.8476	85.6266	78.4161
Bad	14.8362	14.1688	11.9079	21.7041	25.0343	21.559	20.8255	20.4038	20.5502	19.0853	20.968	19.827
Ccnc	4.24729	4.41744	4.05905	5.07447	5.02021	5.02294	8.86322	8.93979	8.54875	5.59535	5.67461	6.51026
Rufy3	13.4849	14.0562	14.9749	17.0954	13.4289	16.1811	21.6484	21.6045	21.8091	17.8575	19.1049	19.2248
AC133316.3	0	0	0	0	0	0	0	0	0	0	0	0
Tmem117	1.37938	2.04698	1.64158	2.74427	3.14304	2.85487	3.30367	2.55521	2.28842	2.61445	3.30969	2.70149
Adamts1	19.1571	20.5772	18.6483	38.8703	22.1811	36.609	47.7717	50.4833	49.2603	41.7146	43.1681	43.8355
Rgn	0.692352	0.794202	0.731316	0.264988	0.372363	0.069516	0.340114	0.296235	0.36768	0.254647	0.228436	0.270173
AABR07071935.1	0	0	0.133915	0.169831	0.130172	0.133659	0	0.0876266	0	0	0.12549	0
Otud4	8.09925	9.29599	9.21601	7.45853	1.61729	7.14788	14.7235	15.4596	14.8061	8.84694	8.98871	9.01153
Arhgef5	1.68886	1.80183	2.07677	2.45484	0.877704	2.41076	2.81093	2.47413	2.55357	2.6823	3.00379	2.71449
Myoz3	0	0	0.0585436	0.222735	0	0	0.0571765	0.191539	0.353204	0.214044	0.219442	0.064884
AC141541.1	0	0	0	0	0	0	0.0933555	0	0	0	0	0
Mir802	0	0	0	0	0	0	0	0	0	0	0	0
AC119635.2	0	0	0	0	0	0	0	0	0	0	1.55083	0
Chek1	17.8851	17.0004	17.11	33.2169	28.1579	31.8403	50.5605	50.278	47.9045	34.0241	35.2608	36.8749
Prim1	5.52494	6.13103	5.45376	12.7536	12.2572	14.2497	18.6594	22.5029	17.8402	15.7168	15.3319	15.9003
AABR07040480.1	0	0	0	0	0	0	0	0	0	0	0	0
Csrnp1	4.40214	5.16201	4.59125	7.9909	6.94646	7.59271	10.9568	10.5212	10.4164	8.81454	9.6849	9.64472
LOC305806	0	0	0	0	0	0	0	0	0	0	0	0
Mirlet7b	8.8724	4.52715	7.82693	8.68537	16.4843	5.85897	5.73313	2.98755	2.45944	8.94262	6.72331	4.33731
Stx4	74.1845	70.3503	70.7911	87.0347	102.296	89.7149	77.6387	79.976	77.1763	85.7277	86.3574	84.1875
Klk6	0	0	0	0	0	0	0	0	0	0	0	0
5S_rRNA	0	0	0	0	0	0	0	0	0	0	0	0
Cyp2d5	0.109456	0	0.174342	0.176881	0.0677875	0.139207	0.102163	0.091264	0.105184	0.223097	0.261398	0.154579
Trim41	7.54892	7.86878	8.13967	11.2576	7.56152	10.0651	12.5448	12.5303	13.2824	11.0237	11.7868	10.4987
LOC300308	0.087808	0.0693398	0.111888	0.0354743	0	0.0139593	0.0546379	0.00915172	0.0421902	0.0767026	0.0655308	0
AABR07000968.3	0	0	0	0	0	0	0	0	0	0	0	0
1700129C05Rik	0	0	0	0	0	0	0	0	0	0	0	0
Clint1	19.964	19.7189	21.4616	25.1821	18.4674	24.5843	40.5801	39.7255	38.7501	28.3823	27.4521	27.7018
Mob1a	13.1169	13.6527	13.1648	19.1857	14.5708	19.8476	30.0047	31.715	29.4999	22.6513	22.2082	22.2486
Slc35f6	4.78729	4.8131	4.66811	7.31169	7.17704	7.94474	9.46332	10.405	10.0564	8.02366	7.19776	7.93572
Dcbld2	22.1657	22.2235	20.3795	13.0726	3.21738	13.3087	31.5179	30.7082	29.3476	16.8988	19.3189	18.3942
LOC100912042	0	0	0	0	0	0.143354	0	0	0.0361058	0.0437607	0.0897285	0
AABR07073271.1	0	0	0	0	0	0	0	0	0	0	0	0
Cad	4.302	4.49663	4.29406	7.29435	4.27899	7.63495	10.8617	10.4838	10.6985	8.2674	9.87687	8.27553
AABR07018167.1	0	0.13726	0.276858	0.131667	0.0672797	0	0.0675982	0.226451	0	0	0.06486	0.0767106
Fgfbp3	2.99829	3.25622	2.8976	2.6744	3.47381	2.82779	2.0124	2.23311	2.3309	2.23652	3.04718	2.60482
Slamf7	0.622753	0.635521	1.37343	1.59664	0.400512	1.64496	2.05675	2.09696	2.55489	1.50644	1.71603	1.67439
AC121204.3	0.426558	0.606315	0.407653	1.16322	1.18877	0.61031	1.39347	0.400119	0.61486	0.745218	0.382006	0.225901
AABR07067080.1	1.12644	2.84648	1.7942	2.16164	0.523214	0.358154	1.40184	0.704416	0.405927	1.47597	3.02638	1.59081
AABR07040332.1	15.5389	17.6698	14.8502	17.5775	21.1715	19.2683	29.0069	22.9973	21.6519	14.931	15.3075	11.521
Gpr3	0	0.0358361	0	0.435428	0.210786	0.32465	0.211784	0.449329	0.490605	0.231241	0.474146	0.440611
Atf1	15.8511	16.595	14.9143	21.1261	19.8107	19.562	26.8951	29.3966	28.6588	24.1241	22.4397	22.2126
Syt12	0.114519	0.310054	0.218886	0.584927	0.714292	0.655403	0.946719	0.920747	0.789989	0.971768	1.15744	0.953041
AABR07069407.1	0	0	0	0	0	0	0	0	0	0	0	0
Dmc1	0	0	0	0	0	0	0.0627418	0	0.0161493	0	0	0
Syde1	13.3267	13.7375	12.9643	12.7363	6.32316	12.7573	13.7316	14.7111	13.1508	14.1656	13.0898	14.2419
Dpp3	6.47295	6.91373	6.50493	10.595	9.44333	9.46292	12.9345	13.757	14.2201	10.9005	11.6137	11.6623
Ppp1cb	116.618	112.725	114.12	119.001	115.975	113.902	151.006	155.211	146.372	127.769	127.513	129.965
Fam219b	16.1228	17.0943	18.1411	20.6101	17.5775	20.7179	25.9516	24.8634	24.8627	22.0025	20.6776	20.6213
AABR07060940.1	0	0	0	0	0	0	0	0	0	0	0	0
Spam1	0	0	0	0	0	0	0	0	0	0	0	0
LOC100364500	1.47532	1.44796	1.76242	2.61827	2.74105	2.3119	2.80321	3.29495	3.22788	2.71555	1.93466	1.61845
Mir3099	0	0	0	0	0	0	0	0	0	0	0	0
Spire2	0	0	0.0244448	0	0	0.024398	0	0	0.0553049	0	0.0229069	0
Tprn	1.74184	1.32852	1.09623	2.74186	1.99304	2.26931	2.51797	2.45746	2.43422	2.26376	2.41597	2.4974
LOC100911033	0	0	0	0	0	0	0	0	0	0	0	0
AABR07008293.3	0	0	0	0	0	0	0	0	0	0	0	0
5S_rRNA	0	0	0	0	0	0	0	0	0	0	0	0
5S_rRNA	0	0	0	0	0	0	0	0	0	0	0	0
AABR07025774.1	0	0	0	0	0	0	0	0	0	0	0	0
AC118496.1	0	0	0.114784	0	0.111576	0.114565	0	0.0751085	0	0	0	0.254431
Htatip2	3.47903	3.69397	2.96432	7.39171	9.96829	7.31666	10.6806	12.1624	11.51	8.16509	8.2584	10.4776
Ppfia2	0	0	0	0.010181	0.031214	0.0320502	0.0784046	0.0210121	0.0484338	0.0293512	0.0300914	0.0355894
AABR07042652.1	0	0	0	0	0	0	0	0	0	0	0.134942	0
AABR07032277.3	0	0	0	0	0	0	0	0	0	0	0	0
Aqp11	0.0898712	0.212907	0.171776	0.163385	0.125231	0.128586	0.0838826	0.112401	0.388633	0.15701	0.281696	0.142785
Cspp1	3.50922	3.83197	3.6288	4.7682	2.67418	4.73326	5.3225	6.00052	5.56222	5.01719	5.68388	5.08171
LOC100363452	27.9811	29.724	23.8455	52.1656	57.5335	48.2798	47.3259	42.9645	43.673	40.9446	44.0522	49.175
Iqca1l	0.0660226	0.0625636	0.0210321	0.026673	0.0204443	0.0419839	0.0410821	0.0275246	0.047584	0.0384483	0.0591269	0.02331
AABR07008898.1	0	0	0	0	0	0	0	0	0	0	0	0
Col12a1	0.848366	0.798734	0.83169	5.7149	2.97954	5.39826	10.4829	10.5283	10.7495	6.32539	6.7545	6.348
Rhobtb1	18.7177	20.295	19.4174	13.9092	10.1956	15.0478	19.5825	19.8217	20.48	16.4492	16.4587	14.8092
AC094643.3	0	0	0.840011	0.532653	1.63306	0	0	1.64897	0.633492	0	0.787164	2.79296
AABR07048856.1	0	0	0	0	0	0	0	0	0	0	0	0
St8sia3	0	0	0	0	0	0	0	0	0	0	0	0
Aars2	6.57023	7.01503	6.19223	4.33017	2.81269	4.51977	6.03351	5.67071	6.30649	5.40867	5.51795	5.43578
Rn50_1_1739.1	0	0	0	0	0	0	0	0	0	0	0	0
AABR07029901.2	0	0	0	0	0	0	0	0	0	0	0	0
Atg16l1	11.2858	11.3298	11.8535	12.2112	10.8647	13.5717	13.6626	13.8588	14.174	13.3723	14.3934	14.0643
Usp3	5.37743	6.1759	4.99701	7.20822	6.90616	7.1148	8.65044	10.0883	9.39441	7.16505	7.21259	7.66424
Rdh8	0	0	0	0.121434	0.139614	0.0477847	0.0935167	0.093983	0.108317	0	0.0448643	0.106123
RGD1563620	0.136178	0	0	0.110032	0.0421683	0.0432979	0.0423679	0.0283861	0.0327156	0	0.0406517	0
AABR07005921.1	0.0128515	0.0121782	0	0.031152	0	0	0.107957	0	0	0.392915	0.103583	0.0272243
Eef1akmt1	4.15497	4.18649	4.07135	5.19517	5.96075	5.16725	5.49807	6.15039	6.51986	5.19153	5.03985	5.12507
Cox6b1	399.193	379.964	399.556	415.261	563.482	407.696	214.51	197.232	206.97	354.336	340.978	351.956
Trim66	0.0134536	0.050995	0.0128573	0.0896813	0.0499917	0.0256655	0.0878997	0.109371	0.106659	0.0940164	0.144581	0.128248
Ccz1b	32.1872	35.3142	33.6732	39.9828	41.2254	39.4738	51.1519	54.3994	52.1379	46.9384	46.159	43.4363
LOC100911229	0	0	0	0	0	0	0	0	0	0	0	0
Lrba	9.19295	9.77011	9.75816	5.40332	2.58973	5.81416	11.4095	10.7366	10.4446	6.89966	7.33125	7.19438
Atp1a4	0.168297	0.159479	0.160838	0.0611925	0.0156342	0.0802651	0.0942492	0.189438	0.169813	0.0735057	0.105503	0.0891285
Ipo5	37.5786	38.2094	35.7396	51.987	38.6007	51.8907	104.113	107.155	105.239	70.1801	72.7087	71.3798
Tas2r13	0	0	0	0	0	0	0	0	0	0	0	0
Trove2	2.94975	3.19453	2.87868	2.61984	0.434956	2.66476	5.69577	7.11494	5.98417	3.05385	3.10291	3.37229
RGD1306954	31.385	34.5685	33.6227	32.6211	36.2101	31.7246	32.3442	28.493	30.2061	34.0911	30.4744	32.0207
Fem1b	5.70894	5.9532	4.8603	5.43869	2.03799	5.49305	9.47035	10.5387	10.6009	7.05571	6.69783	7.20865
AABR07009349.2	0	0	0	0	0	0	0	0	0	0	0	0
AABR07034573.1	0.610651	0.578659	0.291793	1.66524	0	0.582471	1.70988	4.00961	2.64066	2.6671	2.18749	0.970187
AC109685.1	0	0	0.436541	0	0	0	0	0	0	0	0	0
RGD1559534	0	0	0	0	0	0	0	0	0	0	0	0
Slc44a3	0.223737	0.0908638	0.183275	0.116215	0.0593841	0.2439	0	0.0799502	0.11518	0.11168	0.0286241	0.135416
Uba7	5.98237	6.21661	5.55303	4.68545	3.26481	4.75277	4.50489	5.50901	5.21224	5.2394	5.42749	5.44304
Vom1r46	0	0	0	0	0	0	0	0	0	0	0	0
Faim	0	2.26502	0.123476	0.117445	0	0.12324	0.120593	0.161592	0.372476	0.225723	0	0.136849
Gcnt1	7.78207	7.96784	7.45934	5.2571	4.4173	4.6352	6.87382	8.05762	7.10494	5.40991	5.35939	5.491
Ube2j1	19.518	30.4588	23.4642	32.8552	23.8876	30.2162	40.2663	41.1693	45.8296	34.3019	32.9474	35.8498
RT1-M3-1	11.6172	12.1304	11.3144	12.7796	13.5415	12.9867	10.4287	13.2801	12.2125	11.1174	10.9339	10.6589
AC113756.3	0	0	0	0	0	0	0	0	0	1.16942	0	0
Slco1a6	0	0	0	0	0	0	0	0	0	0	0	0
Gucy1b2	0	0.0204435	0.0206176	0.0522946	0	0.0411564	0.0201362	0	0.0155487	0	0.0966025	0.0457011
Plek	3.97386	3.7348	3.45532	7.42185	10.6814	9.10336	20.8559	21.408	20.0484	10.3854	11.3474	10.3846
AABR07042440.4	0	0	0	0	0	0	0	0	0	0	0	0
Herc3	10.0416	10.021	10.3944	6.19061	4.25484	5.87303	10.0435	10.4199	10.5216	6.9079	7.53903	7.04967
Ifit2	14.788	14.6422	12.6364	12.1274	9.23214	11.4922	16.0421	17.1012	16.8027	14.4042	14.1122	14.78
Rrp9	0.509834	0.345088	0.730857	1.39031	21.9218	16.847	23.2832	1.91293	23.648	19.5955	19.8614	1.46574
Tbr1	0.141977	0.0269078	0	0.0344152	0	0	0.0265033	0.0532708	0	0.0248041	0.0508594	0
AABR07047309.3	0	0	0	0	0	0	0	0	0	0	0	0
Schip1	58.1114	59.0947	57.2179	49.8047	50.9605	45.9909	48.6603	50.0658	49.8279	51.226	51.596	49.0998
Rufy1	14.4703	15.4443	15.0351	15.982	13.5031	14.5913	18.7054	18.1795	19.039	16.2897	17.3046	15.7416
St3gal4	15.158	15.5119	16.5326	23.3229	17.955	24.1334	29.3741	29.0713	31.17	25.1282	24.3742	25.9329
Cldn10	0	0.044839	0.0452208	0.0573492	0	0.180537	0.0883298	0.0591801	0.0682063	0.0413335	0.127128	0.0501184
Vsig4	0.164339	0.0778648	0.235584	0.84651	0.877829	0.313511	0.575207	0.873536	0.71066	0.574219	0.77267	0.348131
Pomk	5.16014	4.87099	5.10214	5.32798	4.22205	4.65698	5.35349	5.44844	5.49272	5.40901	4.69228	5.31838
Prkar2b	2.91984	3.55741	3.77169	4.25828	3.60665	3.79508	5.4805	6.36059	5.80444	4.59661	4.79874	5.0298
Ccdc179	0	0	0	0	0	0	0	0	0	0.278433	0	0
AABR07021039.1	0	0	0	0	0	0	0	0	0	0	0	0
AABR07065651.3	0	0	0	0	0	0	0	0	0	0	0	0
AABR07026677.1	0	0	0	0	0	0	0	0	0	0	0	0
AABR07064897.2	5.11869	3.23368	1.08707	3.10192	1.58503	3.25498	6.37014	1.77831	2.04953	1.98725	2.03737	3.61442
Prr13	34.4537	31.1604	33.771	73.4628	85.715	69.0046	100.23	104.535	97.5578	78.5417	74.369	75.1689
AABR07024814.1	0	0	0	0	0	0	0	0	0	0	0	0
AABR07062225.1	0	0	0	0	0	0	0	0	0	0	0	0
Cand2	21.0529	22.6625	21.0901	15.1849	11.9729	15.3065	17.3863	15.2993	18.4153	17.4788	19.4223	16.6383
AABR07031150.1	0.278903	0.352388	0	0.225353	0	0.443387	0.433864	0.581369	0.268016	0.487258	0	0.0984698
AC103024.2	7.16195	11.0284	9.58235	5.53367	4.15826	3.07415	7.01895	7.94968	4.9037	8.75861	13.4693	12.327
Cdc42ep1	30.1791	33.7383	29.253	36.1334	33.1545	38.0875	26.6813	26.3163	27.5375	36.1963	37.514	35.2711
Cdh16	0.338087	0.414603	0.323103	0.542331	0.49882	0.436304	0.278434	0.348223	0.573335	0.330073	0.356207	0.463419
AABR07030183.1	0	0	0	0.290538	0	0	0	0.599627	0.345541	0	0.429362	0
Wdr77	1.44191	1.90656	1.66643	2.4385	2.30517	2.8467	5.7589	2.72605	3.43184	3.16352	3.03308	1.70484
Igkv4-92	0	0	0	0	0	0	0	0	0	0	0	0
AABR07067449.1	2.52225	4.3022	0.964187	3.97405	2.81171	2.40586	1.88335	2.8391	2.90856	3.08456	5.42116	4.80875
Dppa3	0	0	0	0	0.225958	0.116006	0	0.152107	0	0.31871	0	0
Ilvbl	7.05311	7.16398	7.30925	7.4798	8.25156	7.88394	6.87114	7.48429	7.83152	7.37404	7.95478	7.58726
#N/A	0	0	0	0	0	0	0	0	0	0	0	0
AC096455.2	0	0.747926	0	2.15235	0	0.376427	0	0	0.56885	0.344727	0.353421	1.25398
AABR07073453.1	1.67014	2.13172	2.07387	1.85208	1.45652	2.08074	1.34676	1.51334	1.74415	1.89559	1.91287	1.82915
5S_rRNA	0	0	0	0	0	0	0	0	0	0	0	0
AABR07006536.3	1.79882	0.852288	3.00841	3.81528	5.84864	6.43427	6.71581	10.1239	5.1858	6.28525	3.22188	3.81055
Olr1325	0	0	0	0	0	0	0	0	0	0	0	0
AABR07053849.2	0	0	0	0	0	0	0	0	0	0	0	0
Rap1gap2	22.5591	22.7268	22.3759	12.9343	9.45519	12.3167	23.4486	24.5214	24.7305	15.1776	17.8221	15.1652
Mybpc2	3.52067	3.54662	3.00089	6.30446	5.42152	5.85417	6.63135	5.6826	6.46931	8.71363	7.35691	7.86122
Terf1	6.57008	5.954	6.77244	6.8502	7.70253	7.60784	10.8185	11.5901	10.2562	8.06988	8.6588	9.05572
Ocstamp	0.0287472	0	0.0549462	0.0174208	0.0534104	0	0.107326	0.143815	0.0414375	0.125557	0.154468	0.0304485
Fat4	2.05339	2.12451	2.15929	1.61046	0.0843467	1.64552	1.9459	2.16852	2.04119	1.97672	1.97341	1.88271
Ipo9	10.9376	11.2163	11.4414	13.801	4.77316	14.6222	19.642	21.2299	20.6425	15.5831	16.5077	16.0752
Zfp707l1	1.71686	2.2263	1.68395	1.47848	1.09125	1.07739	1.81331	2.54281	2.24682	2.09172	2.4277	1.91418
AABR07003601.4	0	0	0	0	0	0	0	0	0	0	0	0
Hdac1l	0.398707	0.4156	0.41914	0.724847	0.740771	0.722584	1.11642	0.947452	1.29311	0.661733	0.678422	1.35137
Atoh1	0	0	0	0	0	0	0	0	0	0	0	0
LOC690352	0	0	0.0544605	0	0	0	0	0.035636	0	0	0	0
Bbs2	6.01988	7.09324	6.78734	5.05534	4.83826	4.94636	5.19787	4.45537	5.44365	4.88432	4.82578	4.39406
AABR07029762.1	0	0	0	0	0	0	0	0	0	0	0	0
Med26	2.71229	2.38529	2.36831	2.8143	2.90029	2.58713	3.44219	3.38004	3.41741	3.57945	3.23285	3.43084
AY172581.7	2.6369	1.66584	14.2802	1.59796	0.816531	7.54565	0.820397	22.536	22.8057	1.5356	0.787164	0.930987
Rtbdn	0	0	0	0.069706	0	0.109719	0.0357873	0	0	0	0.0686753	0
Fuom	0.57567	0.892654	0.300085	0.475711	0.194465	0.34943	0.122116	0.0981798	0.113154	2.90289	0.187471	0.0554309
Park7	156.099	166.229	162.355	178.353	253.221	180.278	141.679	128.541	138.47	162.858	154.114	144.657
Snx20	2.41716	1.16535	1.21581	4.75416	6.93335	5.50111	8.19317	8.35335	8.37432	5.29715	5.77254	5.12043
#N/A	0	0	0	0	0	0.364044	0.178112	0	0.137534	0	0	0
AABR07004823.1	0	0	0	0	0	0	0	0	0	0	0	0
Mir451a	0	0	0	0	0	0	0	0	0	1.40763	0	0
Erc1	8.03644	8.20404	8.07912	7.2757	4.62542	7.50819	10.8709	11.1436	11.2273	7.78309	8.43136	8.6457
Zfp831	0.00989456	0.0187524	0	0	0.00919172	0	0.00923524	0.00618752	0	0.00864316	0	0
Mir199a2	1.06688	0.884616	1.40195	1.93959	0.123887	2.16251	3.23632	2.00151	2.4029	2.67936	2.6275	2.26005
Svil	26.0047	26.6472	26.0853	19.6779	8.01777	20.6846	27.5256	27.6478	28.0354	22.9678	26.0733	22.6716
AABR07067827.1	1.38123	0	1.32002	1.25554	0.64156	3.29373	1.93379	5.61436	3.98195	1.20654	3.71092	0.73149
Olr1297	0	0	0	0	0	0	0	0	0	0	0	0
Gimap5	19.4801	18.8657	18.021	21.0364	18.2774	21.3684	18.0366	19.0036	17.4374	21.3386	21.2487	23.3979
Nfasc	0.0238535	0.0452077	0.00569909	0.0397518	0.00553979	0.0113764	0.0445281	0.0335626	0.0429795	0.0260459	0.0320433	0.0378979
Vom2r26	0	0	0	0	0	0	0	0	0	0	0	0
Cacng5	0	0	0	0	0	0	0	0	0	0	0	0
Lrfn4	5.73259	4.78224	5.31463	9.59045	10.8101	9.16014	9.90089	9.68215	8.66932	9.58713	10.7943	8.77047
Olr664	0	0	0	0	0	0	0	0	0	0	0	0
Msgn1	0	0	0	0	0	0	0	0	0	0	0	0
Ormdl3	52.5632	50.0119	48.0895	41.1114	32.156	40.7622	59.7303	62.6671	61.1372	46.5686	51.6658	45.7161
Pear1	9.07774	9.85741	8.83676	11.6318	6.69567	11.9911	9.60013	9.52617	9.2101	10.9245	12.1886	11.1693
Cacna1s	0.0208939	0.00989962	0.0199679	0.0189925	0	0	0	0.0130659	0	0.0182513	0.00935581	0
Tubgcp4	3.12726	3.58367	3.40568	4.51007	2.49975	5.54966	6.65231	6.83707	6.18509	5.61171	5.62298	5.13541
LOC691083	2.51096	2.8717	2.56517	1.78399	1.76956	1.94085	1.53549	2.03045	1.18567	1.70177	1.78346	1.69662
AABR07028106.1	41.9363	51.661	36.0699	44.0497	29.8673	31.3341	41.7513	34.5291	45.8404	37.8535	53.8306	37.0152
LOC498675	0.850613	0.80605	0.433554	1.54641	2.15986	1.94726	1.37615	1.02839	1.30785	1.78328	1.62511	2.04217
Tmem64	9.97396	9.98186	9.14286	6.72264	4.72729	6.5528	12.4916	12.6653	12.8732	7.60123	8.15751	8.46218
AABR07065113.1	0.284837	0.449857	0.574672	0.690443	0.676211	0.603761	0.945269	1.16769	0.866775	0.829375	0.878635	0.435781
Myh10	5.23095	5.07938	5.52228	7.40422	3.6516	7.09271	11.4111	10.7121	11.3814	8.39489	9.40326	8.92284
AABR07049738.1	2.71083	0.513762	0.518138	0.328552	0	0.517147	1.01208	0.678083	0.390752	0.473597	0	0.574254
Med9	18.2957	19.0088	15.9434	17.5928	20.6949	16.3456	16.2297	18.7848	17.7994	17.1704	19.6346	17.2431
Zfp438	0.739125	1.04162	0.416575	0.757999	0.757045	0.81348	0.972898	0.722941	0.860523	0.678755	0.74679	0.702574
AABR07008568.1	0	0	0	0	0	0	0	0	0	0	0	0
Cyp2b21	0	0	0	0	0	0	0	0	0	0	0	0
Gpr160	1.01268	0.993893	0.553025	1.09586	0.772752	0.896947	1.28277	0.995141	1.45972	0.853005	0.71257	0.766149
Hoxd9	0	0.091621	0.0924012	0.0585918	0	0.122966	0.0902437	0.0806165	0.0929122	0.0844581	0.230901	0.0682724
AABR07065165.1	0	0	0	0	0	0	0	0	0	0	0	0
Zfp319	4.30768	4.22866	3.54979	3.31386	0.86264	3.10012	4.18917	4.04875	3.49505	4.07832	3.69607	3.46978
Mgp	591.103	578.839	575.567	732.328	1038.12	719.597	521.838	521.086	526.589	586.134	553.959	615.542
AC114393.1	0	0	0	0	0	0	0	0	0	0	0	0
Pola2	21.8957	20.4497	20.1968	16.0404	17.3614	17.2247	16.7566	15.8621	16.0839	17.1289	18.9026	17.9853
Mfap5	28.6913	24.7436	29.1034	51.7031	64.9381	54.1944	32.7696	30.2574	31.7433	41.7161	42.5427	42.8517
AABR07060610.1	0.355901	0.224837	0.226752	0.575134	5.06951	4.75268	2.21457	0.445122	2.47956	3.31614	4.35596	1.13089
AABR07067871.2	0	0	0	0	0	0	0	0	0	0	0	0
AABR07029215.1	0	0	0	0	0	0	0	0	0	0	0.541175	0
Map10	0.95544	0.925067	0.873395	0.465714	0.501671	0.376427	0.988706	0.974152	0.913154	0.580593	0.799847	0.395995
Slc25a38	12.3087	10.8191	9.89545	9.72374	10.7655	9.90923	8.92836	8.87639	8.25337	9.01485	10.2555	9.91402
Rn60_13_0702.2	0	0	0	0	0	0.116494	0	0	0	0	0	0
Olr803	0.0617804	0.117087	0	0	0	0	0	0	0	0	0	0
AABR07052587.4	0	0.518609	0	0	0	0	0	0	0	0	0	0
AABR07072264.4	0.05539	0.122472	0.10587	0.0223775	0.0171518	0.0528339	0.0516991	0.0230919	0.0532279	0.0161282	0.0496049	0.0586682
LOC367195	0	0	0	0.332436	0.254804	0.52326	0.128005	0.0857622	0	0.239597	0.24564	0
Ndst3	0.313464	0.118817	0.219686	0.139303	0.0582396	0.159466	0.234061	0.352842	0.225921	0.200801	0.205865	0.243479
AABR07069588.1	0	0	0	0	0	0	0	0	0	0	0	0
AABR07019449.1	0.238732	0	0.456302	0.144671	0	0	0	0.447869	0	0	0.213798	0.505721
AABR07061036.1	0	0	0	0	0	0	0	0	0	0	0	0
Cdx1	0.142186	0.40421	0.611479	0.0430822	0.264172	0.406873	0	0.0889153	0.102477	0.248406	0.127335	0.602403
AABR07053483.3	0	0	0	0	0	0	0	0	0	0.312808	0	0
LOC100363287	0	0	0	0	0	0	0	0.0690999	0	0	0	0
P3h3	20.4073	19.4197	19.8316	30.8475	26.2799	29.9912	26.1368	26.0968	27.2264	29.6688	32.4448	28.385
Hsd17b2	0	0	0	0	0	0	0	0	0	0	0	0
Atp1b3	38.6426	40.4584	40.1015	78.7605	96.992	75.9102	90.3628	92.2899	89.6235	81.6985	81.187	83.1436
Olr1632	0	0	0	0	0	0	0	0	0	0	0	0
Sdr9c7	0.655118	0.620796	0.431782	0.698173	0.419712	0.603338	0.21085	0.282534	0.472159	0.611729	0.424848	0.43069
Olr403	0	0	0	0	0	0	0	0	0	0	0	0
AC117091.1	0	0	0.116964	0.11125	0	0	0.0571162	0	0	0	0.0548026	0
AABR07038979.1	0.456786	0	0	0.276812	0	0	0	0.285649	0.329216	0.399014	0	0
AC120949.4	1.65748	4.31927	3.16804	7.78434	6.92885	6.71922	10.8292	11.9197	8.3621	8.68712	11.1327	9.65567
LOC102554799	0	0	0	0	0	0	0	0	0	0	0	0
Gpr25	0.0537147	0.101801	0.051334	0.260408	0.0498991	0	0.100271	0.0671804	0.0774268	0	0.144313	0.170681
Man1b1	12.2114	13.4254	13.9469	20.68	16.1952	20.4213	24.2531	25.632	24.2539	22.6982	22.4653	22.7599
Aldoa	1117.19	1207.4	1164.85	1142.93	1468.12	1134.58	851.095	819.927	881.745	1031.52	1026.84	982.466
Pde8b	0.546851	0.518202	0.544391	0.372815	0.105835	0.369478	0.510412	0.655444	0.706147	0.5374	0.775415	0.72402
AABR07008991.1	0	0	0	0	0	0	0	0	0	0	0	0
Pigg	0.319959	0.407746	0.0948967	0.147092	0.0512467	0.147335	0.0720851	0.165587	0.4453	0.558985	0.424871	0.151918
AABR07027533.1	0	0	0	0	0	0	0	0	0	0	0	0
Prr30	0	0	0	0.0176925	0	0	0.0545004	0.0182574	0.021042	0	0.0522927	0.0309236
AABR07065599.1	0	0	0	0	0	0	0	0	0.390752	0	0	0
Fbll1	0	0	0	0	0	0	0	0	0	0	0	0
Gpatch2	4.25057	3.28675	2.69729	3.0498	1.07403	3.40571	6.41121	5.84777	6.49459	4.78233	4.14161	4.06993
Olr630	0	0	0	0	0	0	0	0	0	0	0	0
AABR07058788.3	0	0	0	0	0	0	0	0	0	0	0	0
Hbegf	3.90101	3.55354	3.27112	13.4825	14.8463	13.8997	19.4034	20.051	20.4608	17.0602	17.7383	17.6472
Rn60_X_0775.3	0	0	0	0.0855355	0	0	0	0	0	0.123296	0	0
AABR07032133.1	0	0	0	0	0	0	0	0	0	0	0	0
AABR07006032.1	0	0	0	0	0	0	0	0	0	0	0	0
Zfyve21	25.0317	23.7765	22.6752	21.1721	22.8679	19.5765	23.1422	19.066	20.3067	19.4305	21.5673	18.3456
Slc6a15	0.154451	0.204903	0.132845	0.0374388	0.057392	0.132591	0.158575	0.125561	0.222633	0.148409	0.248975	0.245388
AABR07054562.1	0	0	0	0	0	0	0	0	0	0	0	0
Vom1r34	0	0	0	0	0	0	0	0	0	0	0	0
Myc	4.41475	4.5595	4.14798	16.8185	16.5429	15.9688	25.6031	26.5218	25.7763	19.347	19.635	20.3591
AABR07006866.1	3.42067	2.24918	3.66936	1.77679	1.62127	2.59694	1.30316	1.52793	1.20752	2.68314	1.93807	2.1443
Sspo	0.0596753	0.0247401	0.0142576	0.0248621	0.0173239	0.0462487	0.0278494	0.0186588	0.0161285	0.0456119	0.0501024	0.0395044
Dcaf11	86.5236	91.6413	89.0337	66.4822	57.7433	68.5946	69.9689	71.9771	70.7371	74.3606	76.4476	68.7503
Rbm8a	35.6816	29.5949	29.5858	52.2121	72.024	54.7389	56.9519	55.3927	55.6254	56.7449	54.505	52.555
Rgs5	244.056	248.171	231.13	153.783	62.3397	156.15	191.86	199.001	184.552	149.942	156.254	163.293
Mpp6	8.61171	9.18938	9.64494	11.3495	10.4527	12.6863	15.7994	17.3286	15.9524	12.9328	14.6953	13.5122
AABR07016578.2	1.00599	1.42992	1.9228	1.32086	0.85665	0.799635	1.56492	1.99211	1.63133	1.46459	2.02706	1.50949
AABR07025301.1	3.76003	3.05403	1.28335	3.2551	3.24344	2.04943	4.26151	4.87058	4.45204	3.04987	2.40522	4.26702
Vom2r41	0	0	0	0	0	0	0	0	0	0	0	0
AABR07062157.1	3.70852	2.76118	4.05047	3.85261	1.47647	3.03204	2.22519	2.65041	3.24556	2.08253	3.32119	1.964
Prkcsh	32.1341	32.4547	31.524	44.1263	49.4433	47.2096	46.9907	47.3352	49.1988	45.4149	47.7966	48.6583
Crygb	0	0	0	0.112317	0	0	0	0	0	0	0	0.0981552
Fam84b	2.2384	2.29789	1.66382	1.05503	0.115522	1.54202	2.20531	2.60513	1.92696	1.90099	1.28072	1.58058
Dab2ip	28.842	30.8638	28.3297	30.2685	14.2935	29.1674	26.7274	26.162	26.1173	31.994	33.4534	32.8385
LOC100912321	0	0	0	0	0	0	0	0	0	0	0	0
Agmo	0.130775	0.148709	0.274954	0.0950994	0.0728914	0.24948	0.195297	0.0654237	0.263907	0.137083	0.187386	0.193921
Mprip	37.2872	37.3758	37.3645	44.1472	28.9074	43.0251	48.9396	49.0142	47.81	45.5439	47.1887	45.5589
AC110403.2	0.439484	0	0	0	0	0	0	0	0	0	0	0
AABR07006582.1	0	0	0	0	0	0	0	0	0	0	0	0
Zfp512	7.00292	7.91409	7.53531	7.47111	6.90705	7.17455	8.31156	8.15296	7.92592	7.61255	7.89745	8.44299
AABR07033979.1	0	0	0	0	0	0	0	0	0	0	0	0
LOC679739	19.3722	37.7068	14.3105	31.538	78.2101	13.8836	5.86421	4.9112	6.26403	14.9097	12.9413	12.2003
Ago4	0.589898	0.558993	0.504411	0.545623	0.15863	0.621905	0.854864	0.90281	0.783177	0.596653	0.681212	0.772792
Pcdh15	0	0	0	0	0	0	0	0	0	0.0326513	0.0111583	0
Nek1	1.57529	1.34998	1.4662	1.80133	1.14526	1.52873	1.85388	2.21862	2.32006	1.98631	1.9628	2.20535
AABR07032661.1	0	0	0	0	0	0	0	0	0	0	0	0
Magea10	0	0	0	0	0	0	0	0	0	0	0	0
Alox12	1.19407	1.43796	1.40266	1.59796	1.29412	1.44744	1.04485	1.1045	1.1116	2.0861	1.80454	1.87076
LOC687508	0.66055	0.810045	0.705542	0.588665	0.43315	0.370628	0.2176	0.194387	3.30451	0.475183	0.487167	0.370399
Rac3	1.61144	1.33614	1.15502	0.915497	1.49697	0.960673	0.658027	1.25963	1.01623	1.23168	1.17255	1.60013
AC135285.4	1.17791	1.67429	0.56285	1.60607	1.09423	0.842661	2.74854	1.65734	1.69789	2.05786	2.10976	1.87143
AABR07057805.1	0	0	0	0	0	0	0	0	0	0	0	0
LOC100912455	1.23992	0.36597	0.874153	0.234039	0.453183	0.988813	0.151776	0.0889776	0.0585991	0.514916	0.236646	0.624355
Msrb2	7.17568	7.18283	6.95424	6.1552	6.14959	6.36253	5.65988	5.9725	5.35378	5.51773	5.24959	5.78055
Prickle3	14.0343	16.2431	15.0504	18.0158	11.2708	17.704	15.2739	13.9683	14.2264	15.9324	17.0298	16.5102
Elovl7	1.61683	1.47084	1.29794	1.09737	0.660871	1.41884	2.41455	2.10304	2.19074	1.58182	1.96923	1.84952
AABR07054117.1	0	0	0	0	0	0	0	0	0	0	0	0
Pcyt1b	0.16323	0.123742	0.124796	0.336318	0.030327	0.342534	0.182823	0.32664	0.423516	0.142585	0.263126	0.207468
AABR07050414.1	0	0	0	0	0	0	0	0.339041	0.390752	0	0	0
AC124839.1	0	0	0	0	0	0	0	0	0	0	0	0
Nptx2	0.102134	0.0322609	0.0325356	0.536404	0.347888	0.487102	0.349535	0.659977	0.7361	0.386604	0.701241	0.721187
Cdan1	5.03363	5.5254	5.5127	5.80708	2.84631	5.45743	5.89465	5.97292	5.67838	6.06296	6.07586	5.74548
Olr1149	0	0	0	0	0	0	0	0	0	0	0	0
LOC367975	0.0412896	0.0391264	0	0.0250214	0	0	0.0385382	0	0.0595167	0	0	0.0437332
Fign	1.92229	1.72399	1.83709	0.665658	0.159441	0.965902	1.79419	1.77094	1.71943	1.07946	0.999093	0.836236
Cd244	2.79008	2.40355	3.28974	3.49135	2.55823	4.73508	6.76405	8.20264	7.99126	3.9565	4.86754	4.0682
Usp27x	0.493455	0.321477	0.501059	0.728893	0.687605	0.735443	0.892361	0.829309	0.955795	0.915973	0.828594	1.01265
Med13	3.93133	4.16364	4.21489	3.85385	1.13552	3.74991	7.20767	7.50443	6.95254	5.05738	4.68197	4.51391
AABR07063421.1	0	0	0	0	0	0	0	0	0	0	0	0
Krt13	0	0	0	0	0	0.0420157	0	0.0275455	0	0	0	0
Defb43	0	0	0	0	0	0	0	0	0	0	0	0
Gpbp1	19.2432	18.6878	17.7676	21.7038	20.2974	21.7527	29.1915	29.6087	29.8199	23.9619	24.6051	24.6609
Rn50_20_0064.7	0	0	0	0	0	0	0	0	0	0	0	0
AABR07060595.1	0	0	0	0	0	0	0	0	0	0	0	0
Fam83h	0.253548	0.156172	0.145387	0.176697	0.117769	0.229755	0.165657	0.229905	0.356339	0.243629	0.20436	0.255126
Ufsp2	14.163	14.96	13.1744	16.1127	15.0165	18.0486	17.5552	17.8317	17.666	15.9679	16.4382	16.4414
Mydgf	59.5262	54.1999	58.7806	99.8178	118.928	95.558	102.639	104.389	93.3599	87.2055	93.995	95.7459
Upp2	0	0	0	0	0	0	0	0	0	0	0	0
#N/A	0	0	0	0	0	0	0	0	0	0	0	0
AABR07052608.1	0	0	0	0	0	0	0.421371	0	0	0	0	0
Hat1	13.529	12.6524	13.4033	21.269	25.4979	20.5056	29.6184	30.497	27.1845	24.6259	25.7544	23.0326
Lzts1	1.98924	1.96174	2.03371	1.56992	0.956201	1.5003	1.17662	1.32352	1.36701	1.49519	1.5329	1.35973
Cant1	5.975	6.93849	6.167	7.86052	7.60934	7.12927	7.88871	7.96201	8.61265	7.30705	7.62753	6.83491
Ccdc173	0.0633317	0.0300069	0.0302624	0.0383789	0	0.0604091	0.0295558	0.0990104	0.0684669	0	0.0283585	0.0670799
AC111831.2	4.41995	5.41	4.04805	3.1249	4.10599	5.26997	8.59463	5.75832	7.69844	4.82618	3.79338	5.46179
Polr1e	4.07973	4.02315	3.29665	7.27624	8.35019	7.05526	8.6993	7.7367	7.93658	8.05466	7.72312	7.86948
Serpine3	0.239917	0.136408	0.366854	0.407089	0.267449	0.45769	0.358287	0.600123	0.484158	0.419147	0.515661	0.508231
Ints7	2.80291	2.54339	2.79233	4.00449	2.46179	3.54855	5.67623	5.8745	5.91346	4.12521	4.53351	4.42621
Gm2a	38.1448	36.6574	38.5156	76.8974	73.1115	73.554	117.67	118.15	114.877	81.1938	81.9197	83.6303
Gnpda2	5.20701	5.84235	4.88465	5.92371	4.59973	6.00272	6.2614	6.45243	6.21632	6.33435	6.4655	5.75202
AABR07029221.1	0	0	0	0	0	0	0	0	0	0	0	0
AABR07048059.1	0	0	0	0	0	0	0	0	0	0	0	0
AABR07065532.17	0	0	0	0	0	0	0	0	0	0	0	0
AABR07044551.1	0	0	0	0	0	0	0	0	0	0	0	0
Olr1144	0	0	0	0	0	0	0	0	0	0	0	0
Ccdc58	15.7433	17.2241	16.0942	20.9601	29.6046	21.5241	21.1954	26.7009	22.4869	23.1704	19.7814	25.0126
Ywhaq	50.1627	47.2989	47.8866	75.2175	74.5591	72.9712	90.88	87.7295	85.7125	76.1692	73.8329	80.59
Ctps2	3.9892	4.63705	4.64265	5.04978	4.31524	4.80289	6.17253	6.65234	6.28691	4.75464	4.7634	5.25814
Gimd1	0	0	0	0	0	0	0	0	0	0	0	0
AABR07031844.1	0	0	0	0	0	0	0	0	0	0	0	0
NEWGENE_1308196	4.24351	1.12789	0.692391	1.78755	11.8262	1.53022	0.86943	0.485425	0.783247	1.35615	4.68085	11.3463
AABR07068242.1	0	0	0	0	0	0	0	0	0	0	0	0
LOC100362054	0	0	0	0	0	0	0	0	0	0	0	0
Zswim5	0.971222	1.4867	1.05312	0.962067	0.399064	0.855141	1.27259	1.45997	1.27881	1.25627	1.2545	1.28588
Map6	2.4753	2.26691	2.06395	4.1578	3.41063	4.24677	6.77603	6.2644	6.5733	4.84691	5.1328	4.75091
Olr1452	0	0	0	0	0	0	0	0	0	0	0	0
Olr67	0	0	0	0	0	0	0	0	0	0	0	0
Btg4	0	0	0	0	0	0	0	0	0	0	0	0
Sult1c2	0	0	0	0	0	0	0	0	0	0	0	0
Sf3a2	11.9489	12.657	11.6608	16.079	13.6153	16.2526	18.5991	19.2562	19.4092	16.0192	17.9103	17.4738
Timm21	52.4006	51.5394	50.9227	41.2329	47.324	41.8909	36.3724	39.593	35.5692	42.3384	41.1112	40.9478
AABR07014397.1	0	0	0.287258	0.364301	0	0.573417	0.5611	0.93983	0.216635	0	0.269186	0.318369
AABR07010747.1	0	0	0	0	0	0	0	0	0	0	0	0
Olr718	0	0	0	0	0	0	0	0	0	0	0	0
AABR07003601.9	0	0	0	0	0	0	0	0	0	0	0	0
Casp14	0	0	0	0.013147	0	0	0	0	0	0	0	0
Polg	8.18299	7.76786	7.95728	10.8904	6.33699	11.3595	15.7035	15.8355	15.8545	12.894	13.1551	13.4184
Olr257	0	0	0	0	0	0	0	0	0	0	0	0
Andpro	0	0	0	0	0	0	0	0	0	0	0	0
AC111838.1	0	0	0	0	0	0	0	0	0	0	0	0
Folr1	0.361444	0.114169	0	0.255541	0.503655	0.0574608	0.506039	0.30137	0.347335	0.105244	0.269745	0.191418
Gpr37	0.436179	0.34444	0.330004	0.22027	0.135065	0.294703	0.237483	0.250032	0.170281	0.349263	0.309243	0.153998
Zmym6nb	1.18047	1.1719	1.55793	2.45268	3.08098	2.35923	3.2005	4.148	3.28164	2.7498	2.51709	2.32206
AABR07004450.2	0	0	0	0	0	0	0	0	0	0	0	0
MGC114483	0	0	0	0	0	0	0	0	0	0	0	0
AABR07061187.1	0	0	0	0	0.804344	0	0	0	0	0	0.387708	0
AABR07030265.1	0	0	0	0	0	0	0.564023	0.75578	0	0	0	0
AABR07003056.2	0	0	0	0	0	0	0	0	0	0	0	0
AABR07032593.1	0	0	0	0	0	0	0	0	0	0	0	0
5S_rRNA	0	0	0	0	0	0	0	0	0	0	0	0
Otop3	0	0	0.0258224	0	0	0	0	0	0	0.0236026	0	0
Mettl8	2.9779	3.14749	3.01011	2.6375	2.81957	3.22285	4.0623	2.32777	3.26064	2.50123	3.43617	2.97217
Ldlrad2	0.270451	0.640706	0.775395	0.655573	0.25124	0.773912	0.631074	0.591939	1.07206	1.18123	0.605511	0.859373
Vom2r1	0	0	0	0	0	0	0	0	0.0165128	0	0	0
AABR07007134.1	0	0	0	0.0705925	0.21643	0	0.108727	0	0	0	0	0
Slc37a2	2.51088	2.66023	2.63289	8.60121	6.23627	8.34927	16.2097	16.574	16.5633	10.0984	11.6804	10.8042
AABR07042388.1	0	0	0	0	0	0	0	0	0	0	0	0
NEWGENE_1311658	0	0	0	0.122066	0	0.320224	0	0	0	0.0586514	0	0.0711171
Mt-atp8	14780.5	16695	16952.1	12114.2	5732	12950.8	17879.9	17273	17554.9	14076.9	11217.7	13139.3
Gcsh	29.6339	28.1696	29.6544	31.0109	37.9874	29.1539	32.1751	31.4773	31.4165	30.1936	30.1218	31.7327
AABR07028172.1	0	0	0	0	0	0	0	0	0	0	0	0
AC098008.2	0	0	0.050082	0	0	0	0	0	0	0	0	0
AABR07005709.3	0	0	0	0	0	0	0	0	0	0	0	0
AABR07029535.1	0	0	0	0	0	0	0	0	0	0	0	0
Eva1a	3.53202	4.07321	3.12073	5.67408	5.6646	5.1489	4.29189	4.16742	3.96251	4.56976	3.28249	3.98811
AABR07067023.1	0.0119884	0.0227206	0.0114571	0	0	0	0	0.0224907	0	0.0314165	0.0107363	0.0126979
Ift81	14.4171	12.7131	13.1767	9.91553	10.0182	8.54032	10.3593	10.4468	10.5969	9.94506	9.83722	9.78638
Adgrd1	1.69854	2.02226	1.70651	1.63635	0.303441	1.26705	1.91056	2.16521	2.056	1.4647	1.87217	1.33777
Pomgnt2	6.25752	6.03326	5.04007	5.36516	5.48303	5.91662	4.59082	4.32322	4.84474	6.22993	5.89761	5.84641
AABR07001764.1	0	0	0	0	0	0	0	0	0	0	0	0
Trim26	9.48295	9.52629	10.3998	12.0271	7.65402	13.741	16.638	15.1169	16.1341	11.9728	12.4371	13.1727
AC110690.1	0	0	0	0	0	1.67681	0	0.549658	0	0	0	0.930987
Rab21	38.9223	37.9952	37.7954	45.1113	40.8453	41.2678	58.4545	58.6603	64.365	47.5995	50.4114	52.3299
Trim69	0.209639	0.209693	0.267131	0.282313	0.129832	0.322166	0.456563	0.386008	0.4197	0.233993	0.281615	0.296062
Arid2	4.84831	5.09958	4.85991	3.87753	0.706317	3.82398	6.96758	7.26783	6.97434	4.85616	4.47458	4.85286
Agap3	17.4422	19.1057	17.7088	22.7774	20.5881	22.5959	22.651	23.5375	23.3334	23.4367	25.3164	24.3662
Trpc7	0.189891	0.305903	0.254066	0.126581	0	0.181128	0.0177238	0.130622	0.109487	0.116113	0.20407	0.040226
Otol1	0	0	0	0	0.0371919	0	0	0.0250362	0	0	0	0
Gja5	5.02732	4.8353	5.59626	7.46232	6.50681	7.47136	6.06311	5.87551	5.40103	7.89481	7.01473	7.77787
Eef1a2	422.035	436.856	423.263	268.252	270.983	257.055	291.813	286.702	305.169	301.025	325.435	301.39
Dcun1d4	5.78332	6.03048	6.12452	6.57635	5.7044	6.73048	7.35705	7.86151	8.52947	7.60708	7.11902	7.59195
Acnat2	0	0	0	0	0	0	0	0	0	0	0	0
AABR07065772.3	0	0	0	0	0	0	0.123904	0.166029	0.0956762	0	0	0.140607
AABR07028480.5	0	0	0	0	0	0	0	0	0	0	0	0
Rab11a	45.7016	42.9185	41.4458	57.162	66.0654	55.4081	62.9072	66.4124	63.2702	56.5219	56.5923	59.6795
AABR07051875.1	0	0	0	0	0.792516	0	0	0.266746	0	0	0	0
AABR07067234.1	0	0	0	0	0	0	0	0	0	0	0	0
Tmem199	20.2437	21.5964	19.9653	20.0101	27.2262	18.6508	21.1106	24.131	19.9098	18.5506	19.0184	17.7843
LOC103692716	0.368831	0.499297	0.503549	1.19738	0.978947	1.70879	4.15563	2.09229	4.02535	2.18624	2.07623	1.06036
AC129753.1	0	0	0	0	0	0	0	0	0	0	0	0
Glrx	10.3625	8.79047	10.7249	17.1114	18.4121	13.9848	40.2506	44.0309	38.5165	18.9734	18.6819	21.616
Calm2	220.717	217.88	214.838	404.004	396.54	390.666	547.329	554.226	526.166	419.353	412.934	431.855
AABR07062395.1	0	0	0	0	0	0	0	0	0	0	0	0
AABR07003600.1	0	0	0	0	0	0	0	0	0	0	0	0
AABR07032441.1	0	0	0	0	0.503655	0	0	0.339041	0	0.947193	0.971081	1.14851
LOC102547665	0.148748	0.211433	0.355389	0.135212	0.345455	0.283768	0.208255	0.279057	0.107206	0.389806	0.53285	0.236328
LOC103690157	0	0	0	0	0	0	0	0	0	0	0	0
Mob1b	5.94278	6.97322	5.94594	4.47239	1.21574	4.70673	11.3739	11.9002	11.4422	5.04125	5.82164	5.79457
Tmem130	0	0	0	0.0127466	0.0390798	0	0	0.0131535	0.0151597	0	0	0
Dnajc17	5.67825	7.04492	7.21681	10.9616	11.9093	10.5532	10.1627	8.56601	8.64899	9.56226	9.17431	9.7345
Mpdu1	21.4421	19.1995	22.2718	24.9417	28.4015	25.7824	26.0767	23.5789	23.8683	23.8493	23.5151	24.5877
#N/A	0	0	0	0	0	0	0	0	0	0	0	0
AABR07060746.1	0	0	0	0	0	0	0	0	0	0	0	0
Gata1	0	0	0	0.01886	0	0	0	0.0389243	0	0.0543721	0	0
Rhot1	38.0883	38.9022	37.8169	31.0443	27.8908	30.7468	34.5888	35.1462	33.8793	35.0488	37.9577	37.0427
Flad1	16.7806	16.7283	16.386	16.2434	15.8337	16.6062	12.708	13.171	14.4194	15.2609	17.0269	15.2592
Tmem132e	1.46214	1.44969	1.37146	1.60803	1.15705	1.71751	1.97125	1.71863	1.81488	1.65565	1.49129	1.87849
AABR07068044.2	0	0	0.260285	0	0	0	0	0	0	0	0	0
Clns1a	23.285	24.1195	21.7159	23.6962	27.2998	23.4359	29.8647	28.6956	27.7772	26.4772	26.4258	26.5341
Mef2c	20.917	21.3576	20.6541	20.0932	14.019	17.8954	25.1108	25.0911	25.4253	21.2131	19.4344	21.1925
AABR07012640.2	0	0	0	0	0	0	0	0	0	0	0	0
Ambp	0	0	0	0	0	0	0	0	0	0	0	0
AABR07024995.1	0	0	0	0	0	0	0	0	0	0	0	0
#N/A	0	0	0	0	0	0	0	0	0	0	0	0
AABR07014987.1	0	0	0	0	0	0	0	0	0	0	0	0
AC127784.1	0	0	0	0	0	0	0	0	0	0	0	0
AC118967.1	0	0	0	0	0	0	0	0	0	0	0	0
Fam220a	8.55487	8.76177	7.51506	9.05933	6.90362	9.06676	9.65168	10.2852	9.6326	9.76258	8.92536	9.18321
AABR07072374.2	0	0	0	0	0	0	0	0	0	0	0	0
Ttll3	0.965593	0.890927	0.87423	0.739134	0.590134	0.872558	0.474342	0.476707	0.714239	0.776881	0.56891	0.538284
Fxyd1	624.09	615.631	588.837	635.43	833.036	626.643	385.22	363.455	385.629	579.195	580.449	517.615
Fgf23	2.22532	1.52702	1.90669	6.69621	1.8534	7.17302	10.0987	8.01366	7.68738	3.41854	4.87917	5.03915
#N/A	5.24401	6.21159	5.48143	7.94465	14.3101	10.004	9.78914	6.86607	10.866	7.73006	8.21853	8.33155
Ptbp2	8.62709	8.52176	9.03134	8.3685	4.89919	8.51975	10.8122	10.5992	10.3702	8.76092	9.80088	9.78344
AABR07043928.2	0	0	0	0	0	0	0	0	0	0	0	0.209234
AABR07021384.1	0.60809	0.691479	0.464912	0.589603	0.903833	0.580029	0.794598	0.68448	0.438265	0.424946	0.980242	0.515263
Nudt8	234.117	219.282	224.559	159.733	232.534	152.188	105.162	101.916	101.312	146.352	139.947	141.331
Olr596	0	0	0	0	0	0	0	0	0	0	0	0
RGD1359508	3.1096	3.57467	4.141	3.61436	3.07814	3.30647	4.75801	3.85727	3.67403	3.51785	3.3783	4.26552
AABR07003241.1	0	0	0	0	0	0	0	0	0	0	0	0
Rnf14	30.6761	33.2083	31.6777	28.2079	22.9519	30.731	31.0672	33.5211	32.7931	30.0251	31.6319	28.9535
Trmt10a	3.10982	3.53194	3.40905	6.01392	4.48207	6.04167	6.82963	7.04957	8.20718	6.6914	6.96254	6.27288
Ttc39a	0.0327196	0	0.0312695	0.039656	0	0	0.0610786	0.0613831	0.0235818	0.142907	0	0.0693121
AABR07070189.1	0	0	0	0	0	0	0	0	0	0	0	0
Olr1653	0	0	0	0	0	0	0	0	0	0	0	0
Rsph10b	0.0585584	0.184968	0.0373087	0.141945	0.0543988	0.0930934	0.0364375	0.0244128	0.0703406	0.0341015	0.0349615	0
Epb41l4b	3.83572	4.03433	4.01669	3.01682	2.3755	2.95811	4.03716	4.44856	3.98008	3.63576	3.80054	3.76018
Spatc1l	0	0	0.0420006	0.159796	0.0816531	0	0	0.0274829	0	0	0.0787164	0.0465494
Myf6	0.044015	0	0	0	0	0.0419839	0	0	0	0	0	0
AABR07006718.1	0.865848	0	0	0.262351	0	0	0	0	0	0	0	0
#N/A	0	0	0	0	0	0	0	0	0	0	0	0
AABR07003935.14	0	0	0	0	0	0	0	0	0	0	0	0
AABR07034502.1	0	0	0	0	0	0	0	0	0	0	0	0
Cul1	23.9622	23.4947	23.5182	25.3587	20.2521	25.024	32.8671	33.1927	30.9185	27.8227	27.6806	28.4135
[truncated: 30,404 more rows]

## Sheet:  MI vs sham
MI vs sham
Symbol	FDR	LR	PValue	logCPM	logFC
Pole2	0.00383	13.7	0.000217	0.984433	1.46
Ccl27	3.11e-11	54.7	1.42e-13	3.06587	2.22
Trip13	3.51e-06	29.4	5.76e-08	1.78474	2.1
Hspa5	9.27e-11	52.4	4.61e-13	9.2984	1.05
Mt2A	9.3e-09	42.5	7.03e-11	6.67555	1.23
Slc41a2	1.67e-05	26	3.48e-07	2.85432	1.46
LOC103692716	0.00413	13.5	0.000238	1.03599	1.49
Blm	0.00276	14.4	0.000146	2.15498	1.25
Rnh1	9.93e-08	37.4	9.78e-10	6.23192	1.2
Trmt61a	0.000335	19.2	1.15e-05	1.83153	3.64
Necab3	7.47e-05	22.6	2e-06	2.66186	1.49
Pdcd5	0.0146	10.6	0.00111	2.00841	2.22
Capg	1.35e-11	56.6	5.45e-14	6.47657	1.47
Col12a1	1.69e-17	85.2	2.65e-20	4.8802	2.51
Atp1a3	0.000101	21.9	2.84e-06	2.81354	1.46
Sdc1	5.19e-18	87.8	7.37e-21	4.3346	2.25
Gar1	8.44e-06	27.5	1.59e-07	3.81399	1.31
Pmf1	0.000359	19.1	1.25e-05	3.0998	1.21
Plekhg6	0.000732	17.4	2.99e-05	2.36626	1.28
Itgb2	7.71e-12	57.8	2.95e-14	5.35436	1.48
AC128848.1	4.3e-06	29	7.29e-08	6.01601	1.02
Ankdd1a	0.00154	15.8	7.16e-05	0.575299	1.65
Rfc2	2.6e-05	24.9	5.92e-07	3.44594	1.26
Cd68	9.48e-10	47.4	5.65e-12	4.34307	1.63
Pla2g7	0.00016	20.9	4.88e-06	4.09605	1.09
LOC680121	0.00952	11.6	0.000656	7.40426	1.76
Adam15	3.29e-08	39.8	2.87e-10	6.58321	1.13
Nipsnap3b	1.61e-09	46.3	1e-11	3.16978	1.99
Npw	4.39e-05	23.8	1.09e-06	0.135428	2.24
LOC297756	0.0424	8.21	0.00415	1.18703	1.19
Cxcr4	6.35e-08	38.3	5.97e-10	5.50153	1.17
Rgs14	8.79e-05	22.2	2.43e-06	2.75754	1.4
Galk1	8.1e-07	32.7	1.09e-08	3.93046	1.4
Uchl1	0.000171	20.7	5.28e-06	0.88891	2.04
Ccl3	0.000167	20.8	5.15e-06	1.22856	1.72
Tm4sf19	5.95e-09	43.5	4.22e-11	0.726979	2.89
Nes	4.22e-16	78.4	8.46e-19	4.46611	2.32
Rps12	8.99e-07	32.4	1.23e-08	7.85911	1.04
Slc2a6	0.00613	12.6	0.000383	2.52789	1.06
Fermt3	8.22e-05	22.4	2.24e-06	4.10964	1.3
Ppp1r14b	6.44e-11	53.1	3.1e-13	7.23912	1.35
Dhfr	0.00149	15.9	6.83e-05	2.8386	1.17
Chek2	0.0186	10.1	0.0015	1.20766	1.19
Kcnmb4	0.0104	11.4	0.000731	2.28146	1.07
Recql4	0.000591	17.9	2.29e-05	2.13636	1.39
LOC100909911	0.0101	11.5	0.000708	4.3138	1.06
Nr2c2ap	0.000235	20	7.6e-06	4.52233	1.02
Lmna	5e-08	38.9	4.57e-10	8.02054	1.02
Rida	0.00981	11.5	0.00068	1.80705	1.15
Matk	2.96e-18	88.9	4.11e-21	3.70084	2.51
Spc24	0.00038	18.9	1.35e-05	2.18471	1.54
LOC100911295	0.00607	12.6	0.000378	2.464	1.31
Slamf9	0.000754	17.4	3.1e-05	2.5866	1.28
Pgm3	0.000523	18.2	1.97e-05	3.13239	1.11
Eif1a	4.51e-06	28.9	7.7e-08	5.32846	1.04
Cxcl3	4.65e-06	28.8	8e-08	0.411544	2.78
Bmp2	0.00938	11.6	0.000644	2.12803	1.08
Arl11	2.84e-07	35	3.32e-09	3.28133	1.63
Nhp2	0.0393	8.39	0.00377	4.55598	2.67
Pmepa1	3.19e-15	74.3	6.69e-18	6.01832	1.66
LOC498675	0.0109	11.3	0.00077	0.518623	1.42
Exoc3l2	0.0006	17.9	2.33e-05	1.64497	1.47
Lcp1	2.02e-09	45.8	1.28e-11	6.75197	1.17
Batf	0.0151	10.6	0.00115	0.665042	1.44
Cmtm7	1.26e-06	31.7	1.81e-08	4.23564	1.32
LOC689728	0.00224	14.9	0.000113	3.39327	1.05
Foxc2	0.0054	12.9	0.000327	1.56557	1.28
Ckap4	5.92e-08	38.5	5.55e-10	6.00968	1.17
Cyba	7.27e-09	43	5.41e-11	5.85625	1.48
Fn1	1.84e-17	85	2.95e-20	8.04878	1.75
Col18a1	2.89e-20	98.7	2.94e-23	6.82564	1.98
Mcmdc2	7.29e-05	22.7	1.94e-06	4.33493	1.14
RGD1561310	0.0378	8.48	0.00359	0.951976	1.26
Kif23	4.97e-07	33.8	6.15e-09	1.93682	2.06
Ska1	2.92e-07	34.9	3.44e-09	0.656969	2.73
Rn50_10_0705.2	0.0118	11.1	0.000848	1.21988	1.5
Cdc42ep5	0.000261	19.8	8.56e-06	3.07059	1.22
Gpx8	0.0045	13.3	0.000264	3.76408	1.04
Hmha1	2.35e-06	30.3	3.63e-08	5.00497	1.16
Ctgf	2.24e-52	250	2.07e-56	7.87422	2.76
Spp1	1.97e-47	227	3.04e-51	8.5497	2.7
Galnt6	0.0286	9.12	0.00253	1.58826	1.08
Mustn1	1.58e-20	100	1.56e-23	4.98858	2.34
Pld4	3.53e-05	24.3	8.43e-07	4.84212	1.01
Cd79a	0.000752	17.4	3.09e-05	0.0802823	2.07
Lilrc2	0.00146	15.9	6.65e-05	-0.153983	2.04
P2ry6	3.76e-08	39.5	3.32e-10	3.32324	1.65
Acp5	1.39e-08	41.7	1.08e-10	2.5427	2.06
Npm3	0.000214	20.2	6.85e-06	4.08729	1.08
Clec1b	0.0239	9.53	0.00202	0.499264	1.24
Peg12	5.5e-05	23.3	1.42e-06	1.85005	1.75
Cnih4	8.34e-06	27.5	1.57e-07	5.36539	1.02
Hsp90b1	2.79e-12	60.1	9.21e-15	8.73717	1.18
Nt5dc2	5.74e-07	33.5	7.28e-09	3.8094	1.5
Rbp1	8.17e-06	27.5	1.53e-07	4.33963	1.32
AABR07053500.2	0.0122	11.1	0.000884	-1.55255	3.27
Cd8a	5.33e-09	43.7	3.74e-11	3.36552	1.79
Rn50_X_0699.2	0.00281	14.4	0.000149	1.04583	2.46
RGD1563365	1.9e-05	25.7	4.06e-07	2.83863	1.48
Ldlr	4.22e-16	78.4	8.39e-19	5.70016	1.8
Kif11	9.33e-05	22.1	2.6e-06	2.07369	1.69
Sox18	1.63e-06	31.1	2.41e-08	6.07056	1.03
Ssbp4	2.61e-06	30.1	4.09e-08	6.30006	1.01
Cdkn3	0.00449	13.3	0.000263	1.25097	1.38
Tjp3	0.0076	12.1	0.000501	2.45649	1.07
Rps9	0.000158	20.9	4.81e-06	5.52496	1.13
Mmp9	2.43e-05	25.1	5.44e-07	1.11386	1.97
Relt	5.11e-05	23.4	1.3e-06	3.19364	1.3
LOC691141	7.15e-07	32.9	9.49e-09	2.68361	1.77
RGD1562399	6.29e-07	33.2	8.19e-09	5.81583	1.08
Kif2c	0.00124	16.2	5.57e-05	1.48365	1.54
Slco2a1	1.99e-07	35.8	2.18e-09	4.1107	1.68
Prr7	0.000195	20.4	6.19e-06	2.26346	1.61
Rps27l	7.95e-08	37.8	7.72e-10	5.92828	1.25
Cd33	0.025	9.42	0.00215	2.00366	1
Rad51c	0.0404	8.33	0.0039	1.32921	1.03
Runx1	4.59e-06	28.8	7.85e-08	2.41277	1.81
Dctpp1	1.61e-05	26	3.36e-07	3.60399	1.36
Tmsb4x	3.03e-11	54.8	1.35e-13	10.3533	1.2
Pcgf6	0.0302	8.99	0.00271	1.89023	1.03
Rrp1	5.74e-07	33.5	7.27e-09	4.0376	3.87
Chtf18	0.000622	17.8	2.45e-05	2.28548	1.36
Esco2	0.001	16.7	4.33e-05	0.988676	1.64
Plp2	4.98e-17	83	8.29e-20	5.79221	1.76
LOC682793	0.017	10.3	0.00134	4.54465	2.19
Lilrb3l	0.0105	11.4	0.000739	3.15453	1
Rai14	2.16e-08	40.7	1.8e-10	5.1439	1.41
Ankrd13d	0.0415	8.26	0.00404	1.48198	1.07
Adamts8	1.26e-11	56.7	5.01e-14	2.8475	2.27
LOC100364457	0.018	10.2	0.00143	3.11893	1.01
LOC100361706	0.00665	12.4	0.000425	0.32191	1.6
Pkib	3.07e-05	24.6	7.23e-07	0.179729	2.4
Cenpu	4.51e-06	28.9	7.68e-08	0.991345	2.12
Glipr1	7.33e-05	22.6	1.95e-06	3.97693	1.16
Ier3	2.78e-05	24.8	6.42e-07	5.11998	1.03
Ugdh	2.37e-05	25.2	5.29e-07	4.87523	1.03
Brms1	1.02e-07	37.3	1.01e-09	2.28725	2.74
Tgm1	2.96e-06	29.8	4.72e-08	3.18898	1.46
Fam64a	4.96e-05	23.5	1.25e-06	0.372777	2.62
AABR07065923.1	0.00784	12	0.00052	4.19635	1.01
Mfap5	1.48e-05	26.2	3.01e-07	5.28747	1.05
Rrm2	2.49e-06	30.2	3.89e-08	1.77552	2.05
Il1rn	2.51e-30	146	1.32e-33	4.69422	2.91
Sfn	0.0414	8.27	0.00403	0.681371	1.16
Akip1	4.62e-11	53.8	2.17e-13	4.52739	1.74
Ifitm10	0.00285	14.3	0.000152	2.88924	1.07
Emp1	2.38e-07	35.4	2.72e-09	7.63627	1.01
Serpine1	4.58e-58	277	2.83e-62	8.21123	3
AABR07016779.1	0.0144	10.7	0.00109	-0.738375	2.33
Efemp2	0.000456	18.5	1.67e-05	4.39427	1.02
Calr	3.49e-10	49.6	1.89e-12	9.17902	1.02
Acat2l1	0.0123	11	0.000893	2.48628	1.03
Spc25	0.000673	17.6	2.7e-05	0.834688	1.72
Snrpa1	4.65e-07	33.9	5.72e-09	4.40094	1.39
Pfkp	1.15e-07	37	1.16e-09	5.50512	1.19
LOC687780	0.0111	11.3	0.000787	2.98901	1.13
Edn1	0.0382	8.45	0.00364	1.33776	1.04
Clec7a	0.0033	14	0.000181	2.53229	1.15
Kifc1	4.2e-11	54.1	1.94e-13	3.01447	2.09
Ppp1r18	1.99e-06	30.7	3.02e-08	5.64695	1.02
Snrpf	3.71e-09	44.5	2.51e-11	5.66488	1.44
Pcna	5.62e-06	28.4	9.95e-08	5.94359	1.03
Ppan	6.01e-09	43.5	4.29e-11	4.63524	1.43
Cd83	0.000876	17	3.69e-05	3.03427	1.13
Ass1	1.38e-10	51.5	7.05e-13	3.16891	2.01
Actb	5.64e-12	58.5	2.04e-14	9.7045	1.08
Tssc4	6.22e-05	23	1.63e-06	4.66055	1.05
Rgs1	0.000859	17.1	3.6e-05	0.715801	2.17
Ch25h	2.04e-05	25.5	4.4e-07	2.22433	1.62
LOC100362684	0.00667	12.4	0.000427	2.51756	1.29
Rpl17	1.22e-06	31.8	1.74e-08	8.12736	1.02
Pdia4	6.45e-08	38.3	6.11e-10	6.32818	1.11
Cd180	0.00113	16.5	4.94e-05	2.22291	1.38
Socs3	4.32e-05	23.8	1.07e-06	4.50803	1.25
Rfc3	0.00073	17.4	2.98e-05	3.25527	1.14
RGD1562402	0.000333	19.3	1.14e-05	3.68848	1.15
Slc37a2	3.79e-08	39.5	3.36e-10	4.11544	1.57
Tacc3	9.82e-06	27.1	1.9e-07	2.4939	1.64
Uck2	8.63e-07	32.5	1.17e-08	4.32851	1.33
Fgr	1.47e-06	31.4	2.14e-08	3.95222	1.34
Stxbp2	0.00404	13.6	0.000231	2.61848	1.08
Troap	3.46e-08	39.7	3.03e-10	1.35499	2.53
LOC103690796	0.00515	13	0.000309	0.115913	1.63
Sdc4	1.59e-07	36.3	1.68e-09	5.22099	1.25
Sapcd2	0.0121	11.1	0.000881	1.54333	1.24
Smg9	8.28e-05	22.4	2.26e-06	3.65463	1.19
Ewsr1	0.00992	11.5	0.000691	2.30969	1.17
Slc7a8	0.00114	16.4	5.02e-05	3.23159	1.05
Snrpd1	6.67e-12	58.1	2.5e-14	4.83033	1.69
Prim1	2.3e-05	25.2	5.09e-07	3.91866	1.2
Rpa3	0.00035	19.1	1.21e-05	3.85282	1.1
Fes	5.63e-05	23.2	1.46e-06	5.25364	1.03
Eif4a1	2.4e-12	60.4	7.84e-15	8.27007	1.29
Cd300a	6.97e-06	27.9	1.27e-07	2.46803	1.65
Tlcd1	0.00148	15.9	6.77e-05	3.26021	1.07
Dctd	1.79e-05	25.8	3.8e-07	2.37861	1.61
Trem1	0.00047	18.5	1.73e-05	2.04816	1.42
Bok	9.44e-05	22.1	2.64e-06	3.7699	1.23
Stk19-ps	0.0146	10.6	0.00111	-0.121842	1.52
Dapk3	3.86e-06	29.2	6.44e-08	6.07283	1.07
Tma7	0.00036	19.1	1.26e-05	3.32264	2.45
Emb	5e-08	38.8	4.58e-10	2.64755	1.88
Fabp5	2.46e-06	30.2	3.83e-08	6.29622	1.1
Rab26	0.0113	11.2	0.000805	2.09973	1.23
Lst1	2.81e-06	30	4.41e-08	2.62185	1.68
Gdf15	0.000186	20.5	5.82e-06	1.31598	1.87
Fam110a	0.0251	9.4	0.00216	1.92451	1.05
Orc1	0.00123	16.3	5.45e-05	1.32407	1.57
Fbxl2	0.0132	10.9	0.000976	1.29012	1.29
Pole	0.0022	14.9	0.000111	2.5468	1.29
Tpm2	8.45e-23	111	6.52e-26	6.25668	1.99
Apobec3b	0.000195	20.4	6.15e-06	2.00799	1.53
Tpm4	9.75e-06	27.2	1.88e-07	7.57379	1.06
Dnd1	0.00493	13.1	0.000293	0.413201	1.48
Pfn1	1.93e-09	45.9	1.22e-11	9.01235	1.05
Tcf19	7.29e-05	22.7	1.94e-06	2.95775	1.5
Tsc22d1	2.48e-09	45.4	1.61e-11	8.15319	1.07
Arpc1b	2.84e-14	69.7	6.84e-17	7.87036	1.39
Sec61a1	2.67e-08	40.2	2.27e-10	6.60589	1.11
Cdca3	2.93e-08	40	2.52e-10	1.52217	2.37
Syt8	0.00684	12.4	0.00044	0.839904	1.39
Tubb6	2.57e-34	165	7.93e-38	6.86824	2.36
Rhoc	1.74e-12	61.1	5.52e-15	7.24536	1.41
Adss	1.19e-05	26.7	2.36e-07	5.27004	1
Gja4	1.35e-06	31.5	1.95e-08	5.06627	1.14
Bax	1.1e-09	47.1	6.75e-12	5.80276	1.39
Cyp27b1	1.47e-08	41.5	1.17e-10	0.588974	3.2
Cebpe	3.7e-06	29.3	6.14e-08	0.48795	2.61
Tnfsf18	0.000378	19	1.34e-05	1.22583	1.92
Thbs1	0.00627	12.6	0.000394	6.28913	1.04
Ier5	6.76e-09	43.2	4.94e-11	5.67426	1.22
Ell3	0.0112	11.2	0.000802	1.57213	1.26
Slc39a7	9.37e-07	32.4	1.29e-08	6.15843	1.04
Fkbp2	0.00022	20.2	7.06e-06	5.00255	1.01
Ckap2	1.69e-05	25.9	3.54e-07	1.91134	1.79
Lyc2	0.000341	19.2	1.18e-05	1.87877	1.51
Tmem97	1.9e-10	50.8	9.97e-13	3.73503	1.85
Kntc1	0.000113	21.7	3.25e-06	2.13029	1.78
C1qtnf6	0.0014	16	6.36e-05	3.3066	1.02
Fbl	1.54e-12	61.3	4.8e-15	5.53458	1.53
Etv4	9.52e-07	32.3	1.31e-08	1.85032	2
Mthfd2	6.07e-09	43.4	4.35e-11	3.68833	1.69
Mnda	3.99e-05	24	9.71e-07	4.45537	1.11
LOC100364435	1.22e-05	26.7	2.44e-07	1.9957	2
Rpl12-ps1	2.28e-06	30.4	3.51e-08	4.27168	3.76
Sln	0.0209	9.84	0.00171	-0.505372	1.64
Hn1l	9.14e-09	42.6	6.88e-11	4.86217	1.33
Crabp1	2.6e-05	24.9	5.93e-07	-0.797165	3.37
AABR07063424.1	0.000612	17.8	2.4e-05	-0.574967	5.54
Dnph1	0.00692	12.3	0.000448	2.63065	1.17
Pcgf1	4.33e-10	49.1	2.4e-12	1.42953	4.04
Il6	0.00246	14.7	0.000126	0.108347	1.69
Hjurp	0.0159	10.5	0.00123	1.83623	1.28
B3galt2	0.000719	17.5	2.92e-05	4.22024	1.01
Ncaph	1.16e-05	26.8	2.28e-07	2.07288	1.79
Csf3r	0.00272	14.5	0.000144	3.46156	1.04
Plac9	0.000236	20	7.65e-06	2.57326	1.67
Fxyd5	7.93e-20	96.5	9.05e-23	5.38181	2.04
Ccna2	2.08e-08	40.8	1.73e-10	2.2475	2.26
Mob3c	0.00046	18.5	1.69e-05	3.09776	1.17
Top2a	8.75e-11	52.5	4.32e-13	3.44144	1.92
Lyz2	1.4e-17	85.7	2.12e-20	8.65697	1.44
Rpl41	5.02e-07	33.8	6.25e-09	10.0072	1.01
Cotl1	2.28e-19	94.1	2.96e-22	6.17535	1.88
Mms22l	2.84e-07	35	3.32e-09	1.79123	2.12
LOC100361475	0.0089	11.8	0.000604	1.10025	1.72
Pak1ip1	3.43e-09	44.7	2.3e-11	3.91898	1.59
Tmsb10	2.28e-16	79.7	4.29e-19	8.46026	1.56
LOC100359539	8.88e-07	32.5	1.21e-08	1.30208	2.29
Col8a1	0.000244	19.9	7.95e-06	5.52022	1.13
Nop58	3.67e-06	29.3	6.08e-08	5.54559	1.03
Upp1	5.28e-06	28.5	9.25e-08	5.50603	1.03
Foxm1	0.00147	15.9	6.73e-05	2.03852	1.46
Dok2	2.1e-06	30.6	3.21e-08	4.70512	1.15
2019-09-05	0.000309	19.4	1.05e-05	3.37373	1.11
Exnef	0.000993	16.7	4.27e-05	1.27978	1.5
Lpcat4	0.00178	15.4	8.51e-05	2.59637	1.18
Nme1	3.06e-11	54.7	1.38e-13	5.15107	1.7
Oscar	0.000123	21.5	3.58e-06	1.87117	1.73
Ncf4	2.83e-06	29.9	4.46e-08	3.81127	1.38
Cenpk	1.16e-05	26.8	2.28e-07	0.888351	2.08
Rpf2	6.56e-05	22.9	1.72e-06	4.14689	1.14
Bik	0.0397	8.37	0.00382	0.615394	1.2
Has1	0.0167	10.3	0.00131	2.29332	1
Rad18	5.98e-05	23.1	1.56e-06	2.12708	1.59
Lyl1	9.86e-05	22	2.79e-06	3.69394	1.2
Il17ra	1.34e-14	71.3	3.11e-17	5.69741	1.6
AABR07060872.1	0.0367	8.56	0.00344	2.08732	1.05
Mboat1	0.00566	12.8	0.000347	2.54583	1.07
Ptgs2	2.16e-06	30.5	3.32e-08	2.2488	1.85
LOC100158225	0.0133	10.9	0.000985	1.51228	1.16
Tspo2	0.0136	10.8	0.00102	-0.842492	1.87
Rpp21	1.4e-06	31.5	2.03e-08	4.59324	1.25
Rpl12	2.79e-08	40.1	2.39e-10	6.99557	2.48
Cep41	0.0138	10.8	0.00103	2.28079	1.08
Hk3	1.75e-12	61	5.62e-15	3.47274	2.15
Nsl1	0.00055	18.1	2.09e-05	0.774771	1.91
Apln	0.000294	19.5	9.88e-06	4.13954	1.04
Steap1	3.57e-05	24.2	8.55e-07	-0.136399	2.41
Mrpl36	0.000493	18.3	1.84e-05	0.665761	5.57
LOC103690015	0.00242	14.7	0.000124	2.69153	1.59
Iqgap3	3.76e-06	29.3	6.26e-08	2.40924	1.88
RGD1559482	7.14e-15	72.6	1.59e-17	5.19053	2.01
AABR07015066.1	5.61e-07	33.5	7.07e-09	2.332	8.62
AABR07015078.1	6.22e-05	23	1.63e-06	2.64532	4.76
Nfkbiz	7.09e-05	22.7	1.88e-06	4.22939	1.13
Sepw1	0.0105	11.4	0.000737	2.36067	1.59
Laptm5	1.84e-06	30.9	2.77e-08	5.56607	1.06
RGD1563400	0.00528	13	0.000319	-0.177288	2
AC095947.2	0.031	8.94	0.00279	2.67243	1.02
Ptger2	0.000184	20.6	5.78e-06	0.999071	1.82
Parvg	8.44e-05	22.3	2.31e-06	2.6842	1.47
Nfkbie	0.000991	16.8	4.26e-05	3.13848	1.15
Kcnn4	8.35e-20	96.3	9.8e-23	4.27775	2.41
Gna15	0.00129	16.2	5.8e-05	2.65582	1.21
Fkbp1a	2.21e-09	45.6	1.41e-11	8.2905	1.09
Mcm6	1.76e-12	61	5.72e-15	4.39804	1.83
Dsn1	4.95e-06	28.7	8.57e-08	1.99095	1.82
Aldh3b1	0.0146	10.6	0.00111	2.31063	1
S100a4	4.9e-27	131	2.87e-30	6.62222	2.44
Ripk3	5.33e-09	43.7	3.74e-11	3.86665	1.65
Cnn1	9.15e-12	57.4	3.56e-14	2.93756	2.17
Fam167b	2.56e-05	25	5.8e-07	3.02778	1.46
Tmem63c	0.00151	15.8	6.95e-05	1.89607	1.62
Rgs19	3.21e-07	34.7	3.87e-09	4.17036	1.41
Casp3	2.96e-07	34.9	3.49e-09	4.24241	1.4
LOC100911372	0.00368	13.8	0.000206	4.88481	1.07
Gchfr	0.00382	13.7	0.000215	3.40392	1.04
Gmnn	6.59e-09	43.3	4.77e-11	2.75626	1.99
Incenp	0.000576	18	2.21e-05	3.01098	1.24
Adgrg5	0.0249	9.43	0.00213	2.25801	1.03
Dnajc3	3.65e-06	29.4	6.03e-08	5.12787	1.09
Ptk7	0.00694	12.3	0.00045	3.23483	1.04
Dynlt1	0.00016	20.9	4.87e-06	4.26243	1.09
Manf	8.8e-10	47.6	5.13e-12	7.03313	1.34
Crmp1	0.0272	9.24	0.00237	1.32242	1.22
LOC690126	0.0301	9	0.00269	-1.08309	1.88
Capns1	0.00706	12.3	0.000459	3.04407	1.98
Idi1	1.19e-07	36.9	1.22e-09	3.38664	1.58
Thbs4	2.68e-13	65.1	7.18e-16	2.79116	2.43
Litaf	3.06e-11	54.7	1.39e-13	6.24892	1.35
Sat1	1.24e-06	31.7	1.77e-08	5.90035	1.09
Gal	0.000394	18.9	1.41e-05	0.0272079	2
Ncapd2	0.00168	15.6	7.93e-05	3.56237	1.05
Aldh18a1	0.00145	15.9	6.62e-05	1.25146	2.22
Timeless	0.00054	18.1	2.04e-05	3.256	1.13
Ftsj3	6.75e-07	33.1	8.87e-09	5.09931	1.16
Batf3	0.0125	11	0.000919	1.7886	1.14
Btg3	0.000546	18.1	2.07e-05	3.95944	1.01
Pop1	0.000397	18.8	1.42e-05	2.1687	1.39
Alox5ap	8.85e-05	22.2	2.45e-06	3.78232	1.18
Igsf6	0.00123	16.3	5.51e-05	3.14821	1.12
MGC105649	8.38e-11	52.6	4.11e-13	3.76471	1.93
Plk4	1.42e-06	31.4	2.06e-08	1.98439	2.01
Hspb1	3.45e-34	165	1.17e-37	9.4741	2.2
Rfc5	0.000482	18.4	1.79e-05	3.07996	1.16
Cd200r1	3.66e-05	24.2	8.82e-07	2.40653	1.5
Trpv2	1.11e-07	37.1	1.1e-09	3.41044	1.65
Fcrla	0.00105	16.6	4.55e-05	1.01665	1.57
Rhov	4.77e-08	39	4.33e-10	0.716539	2.71
Mnd1	0.00365	13.8	0.000204	0.148234	1.82
LOC100360087	4.6e-10	49	2.57e-12	8.15229	1.21
Meox1	0.00176	15.5	8.34e-05	0.962819	1.59
Tagln2	1.39e-10	51.5	7.14e-13	8.55911	1.13
Slc1a5	1.6e-08	41.3	1.3e-10	4.62928	1.4
Ccnb1	1.08e-05	26.9	2.11e-07	1.43445	1.92
Ranbp1	2.04e-09	45.8	1.29e-11	5.87947	1.4
Ccnf	6.28e-07	33.2	8.14e-09	1.58444	2.18
Tifab	0.00174	15.5	8.24e-05	2.71226	1.15
Gmds	0.000108	21.8	3.1e-06	3.04967	1.33
Mcm2	1.61e-05	26	3.35e-07	4.52049	1.15
Pmaip1	5.32e-06	28.5	9.35e-08	3.28946	1.41
Entpd1	0.000356	19.1	1.24e-05	2.29034	2.07
Fndc4	0.00124	16.2	5.56e-05	3.56191	1.01
Rrp7a	2.29e-05	25.2	5.06e-07	3.04614	3.01
LOC257642	2.56e-05	25	5.79e-07	2.61303	3.73
Eif6	3.6e-05	24.2	8.66e-07	6.02614	1
AABR07006049.2	0.0211	9.81	0.00173	-0.505029	3.54
Postn	3.21e-36	174	7.93e-40	6.9535	2.37
Lilrb3	0.00182	15.4	8.71e-05	2.7277	1.16
Agpat4	0.000285	19.6	9.46e-06	3.69737	1.14
Cdc25c	0.00989	11.5	0.000688	1.51818	1.22
LOC100912478	0.00233	14.8	0.000119	0.813687	2.81
Inhbb	1.71e-19	94.8	2.11e-22	4.35648	2.62
Ctsz	1.9e-16	80.1	3.52e-19	6.43401	1.76
Cenpw	1.52e-05	26.2	3.11e-07	0.564697	2.17
Fam60a	0.0485	7.9	0.00495	2.61857	1.11
Lgals3	4.85e-13	63.8	1.35e-15	6.90617	1.42
Clcf1	5.2e-07	33.7	6.51e-09	1.66736	2.11
Cxcl2	8.69e-06	27.4	1.65e-07	0.198347	2.63
Crlf1	4.88e-06	28.7	8.43e-08	4.4936	1.19
Fam166a	0.03	9.02	0.00267	1.7642	1.15
Aacs	0.00348	13.9	0.000194	2.5634	1.16
Pdlim7	4.52e-08	39.1	4.03e-10	6.67354	1.08
Samsn1	5.08e-05	23.4	1.29e-06	2.08719	1.67
Snx20	3.43e-05	24.3	8.16e-07	2.36081	1.84
Hbegf	4.13e-14	68.9	1.02e-16	4.35655	1.98
Eef1b2	3.03e-06	29.8	4.86e-08	7.46037	1.07
Gpsm3	0.00138	16	6.24e-05	3.09185	1.12
Clec4d	3.49e-05	24.3	8.32e-07	2.43048	1.55
Mrto4	7.57e-09	42.9	5.66e-11	4.79605	1.36
Mettl1	0.00123	16.3	5.46e-05	2.72466	1.21
Myrf	0.000239	20	7.76e-06	2.79969	1.48
Tnfrsf10b	0.00204	15.1	0.000101	1.95177	1.48
Il11	3.54e-06	29.4	5.82e-08	0.461633	2.49
Ndc80	2.71e-05	24.8	6.21e-07	1.59499	1.92
Npm1	6.79e-09	43.2	5.03e-11	8.05758	1.08
Fam105a	0.000105	21.8	2.99e-06	3.0387	1.24
Slc27a4	1.08e-05	26.9	2.09e-07	4.63675	1.12
LOC100910336	4.74e-05	23.6	1.19e-06	5.37072	1.08
RGD1565363	5.54e-07	33.5	6.96e-09	6.65599	1.19
Fcer1g	5.98e-07	33.4	7.66e-09	5.44384	1.12
Cdca7	1.12e-10	52	5.65e-13	2.72855	2.15
Fhl1	1.32e-19	95.4	1.59e-22	9.40448	1.42
Ccl2	2.92e-32	155	1.26e-35	5.56938	2.56
Vim	1.11e-20	101	1.03e-23	9.43893	1.5
Cyr61	5.67e-20	97.3	5.95e-23	5.94347	1.91
Ugt1a2	1.68e-05	25.9	3.52e-07	3.5815	1.3
B4galt5	8.22e-05	22.4	2.23e-06	5.07626	1.06
Ecscr	4.8e-11	53.8	2.27e-13	4.95212	1.52
Lmnb2	0.0185	10.1	0.00148	2.78778	1.15
RGD1311084	0.00382	13.7	0.000215	0.821883	1.45
Tgif1	2.7e-07	35.1	3.14e-09	3.69429	1.48
Lpcat2	0.000184	20.6	5.77e-06	2.95612	1.32
Hcls1	6.29e-07	33.2	8.18e-09	4.61112	1.35
Sypl2	0.00581	12.7	0.000358	1.57612	1.26
Cstb	1.39e-08	41.7	1.07e-10	6.20523	1.25
Myl6	5.83e-09	43.6	4.12e-11	8.68981	1.18
Hamp	7.22e-33	158	2.67e-36	5.93629	2.57
Fam129b	2.68e-13	65.1	7.2e-16	6.93604	1.47
Cyp4f18	0.000609	17.9	2.37e-05	1.31956	1.79
Cdca8	5.99e-06	28.2	1.07e-07	2.0596	1.97
S100a8	2.97e-06	29.8	4.75e-08	4.5134	1.34
Psph	0.00637	12.5	0.000402	2.78139	1.03
AABR07012775.1	0.0451	8.07	0.00449	-0.996328	1.79
Arhgap11a	4.97e-05	23.5	1.25e-06	3.01764	1.34
Gprc5a	0.000713	17.5	2.89e-05	1.27223	1.62
Ercc1	1.27e-05	26.6	2.56e-07	4.34447	1.17
Trappc2b	0.000247	19.9	8.07e-06	1.38	9.64
LOC690468	0.00226	14.9	0.000114	2.17649	2.2
Metrnl	5.4e-10	48.6	3.08e-12	4.64797	1.51
Plvap	5.84e-20	97.2	6.31e-23	4.92612	2.06
Sec61b	1.23e-08	41.9	9.44e-11	5.21538	1.41
LOC100360117	1.74e-05	25.9	3.67e-07	4.80098	1.23
Reg3g	7.79e-16	77.1	1.59e-18	2.26655	3.4
Kcne3	0.002	15.2	9.77e-05	1.02097	1.65
LOC100362384	1.86e-06	30.8	2.82e-08	2.18388	1.92
Snrpg	5.52e-05	23.2	1.43e-06	5.40327	1.06
Erh	2.99e-07	34.9	3.56e-09	6.3796	1.12
Trim59	0.00621	12.6	0.000389	2.01408	1.15
Dnajc22	0.0246	9.46	0.0021	1.85423	1.03
Arhgap4	7.65e-05	22.5	2.06e-06	3.99651	1.21
Anpep	4.65e-09	44.1	3.18e-11	5.12417	1.36
Gpr176	0.0226	9.66	0.00188	2.00026	1.01
Aurkb	2.29e-09	45.6	1.48e-11	2.21324	2.32
Mall	1.03e-09	47.3	6.19e-12	3.67425	1.75
Chchd6	0.00276	14.4	0.000147	2.90307	1.09
Cnn2	1.12e-05	26.9	2.18e-07	4.89715	1.23
Fpgs	9.17e-08	37.5	9e-10	4.81293	1.35
Tnfaip6	0.000554	18.1	2.11e-05	3.18753	1.15
Itgad	0.000779	17.3	3.22e-05	4.52677	1.06
Rab7b	0.000146	21.1	4.37e-06	3.36052	1.26
Igfbp2	5.39e-12	58.6	1.91e-14	1.43679	3.3
AABR07026997.1	0.000132	21.3	3.89e-06	4.90955	1.2
Nop56	1.91e-07	35.9	2.09e-09	5.52646	1.11
Clec5a	1.98e-08	40.9	1.63e-10	2.55548	2.07
Tnfrsf12a	2.27e-27	132	1.26e-30	5.46981	2.28
Mapk11	0.00123	16.3	5.51e-05	2.87527	1.18
Nup107	0.0011	16.5	4.77e-05	3.60874	1.01
PVR	1.47e-08	41.5	1.17e-10	4.10751	1.69
Ptrh1	9.41e-10	47.5	5.58e-12	3.39662	1.93
LOC100359668	0.0456	8.04	0.00457	0.832961	1.07
Arhgap9	1.82e-05	25.8	3.87e-07	4.32166	1.16
Crlf2	5.42e-06	28.5	9.57e-08	3.73083	1.37
Cfap157	3.75e-06	29.3	6.23e-08	2.71431	1.63
Gpatch4	8.7e-06	27.4	1.65e-07	3.26682	1.41
Enkd1	0.00932	11.7	0.000638	1.19707	1.3
Tuba1c	0.00245	14.7	0.000126	2.71103	1.39
Foxs1	0.000785	17.3	3.26e-05	2.98954	1.19
AABR07030162.1	0.0279	9.18	0.00245	1.55493	1.09
Csrp3	4.06e-13	64.2	1.1e-15	10.161	1.27
Wisp2	5.61e-07	33.5	7.08e-09	1.76388	2.11
Crip1	8.69e-06	27.4	1.65e-07	6.61924	1.03
Adap1	0.000304	19.5	1.03e-05	2.49435	1.33
Fcgr1a	9.21e-10	47.5	5.43e-12	4.41457	1.6
Rfc4	1.81e-07	36	1.96e-09	3.09339	1.67
Pinx1	0.00415	13.5	0.000239	2.9031	1.02
Prss23	4.27e-11	54	1.99e-13	6.56471	1.3
Diaph3	6.4e-06	28.1	1.15e-07	0.532244	2.48
Uhrf1	4.19e-09	44.3	2.86e-11	3.42758	1.74
Lsm2	0.000309	19.4	1.05e-05	3.49313	1.22
Slc2a1	8.07e-06	27.6	1.51e-07	5.20426	1.04
LOC100909441	5.32e-06	28.5	9.36e-08	3.00331	1.73
Tpx2	9.91e-07	32.2	1.37e-08	2.60359	1.8
Sh2d5	2.09e-05	25.4	4.56e-07	0.798506	2.83
Haus4	0.00154	15.8	7.13e-05	2.73741	1.23
Snai1	3.99e-07	34.2	4.87e-09	3.85325	1.46
Myo1g	1.73e-05	25.9	3.65e-07	4.30634	1.17
Lmcd1	5.45e-18	87.6	8.07e-21	7.34681	1.6
Fzd2	4.3e-05	23.8	1.06e-06	3.71015	1.22
Cdc45	0.00827	11.9	0.000554	2.32064	1.07
LOC103694910	0.00408	13.5	0.000234	1.89288	4.89
Csrp2	0.00155	15.8	7.21e-05	3.82491	1.03
Ankrd2	5.56e-22	107	4.8e-25	3.40745	3.36
Erp29	1.18e-06	31.9	1.66e-08	5.08902	1.35
Fam111a	0.00314	14.1	0.00017	1.79497	1.3
Clec4a1	0.000284	19.6	9.42e-06	3.78037	1.11
Zfp367	1.72e-06	31	2.56e-08	3.66369	1.38
Sphk1	0.00296	14.3	0.000159	2.72771	1.15
Hsp90aa1	2.59e-08	40.3	2.18e-10	3.58002	2.75
LOC103691261	7.21e-10	48	4.16e-12	0.0298863	3.81
Ptpn6	4.28e-06	29	7.25e-08	4.83079	1.09
Ubald1	0.000376	19	1.33e-05	1.74354	2.96
Slpi	5.05e-13	63.7	1.42e-15	4.97875	1.89
Ttc9	0.00017	20.7	5.25e-06	4.39756	1.05
Mybl1	4.25e-06	29	7.18e-08	2.68955	1.67
LOC257642	0.000314	19.4	1.07e-05	1.90772	3.87
Phgdh	3.12e-05	24.5	7.35e-07	2.58984	1.47
Pbdc1	0.000253	19.9	8.26e-06	3.89352	1.19
Hmgb2l1	5.64e-05	23.2	1.46e-06	-0.431299	3.26
Depdc7	0.037	8.53	0.00349	0.481	1.16
Htatip2	0.000191	20.5	6.02e-06	3.02752	1.28
Mis18a	8.79e-06	27.4	1.67e-07	0.658022	2.36
Acta2	4.83e-08	38.9	4.4e-10	6.92627	1.08
Selm	6.9e-08	38.1	6.6e-10	6.57252	1.3
Birc5	7.5e-10	48	4.35e-12	1.8977	2.93
Zfand2a	3.97e-05	24	9.66e-07	4.43229	1.15
Hmgb2	1.22e-05	26.7	2.41e-07	4.81429	1.06
Arhgap22	8.43e-13	62.6	2.5e-15	3.40639	2.1
Tuba1b	1.51e-12	61.4	4.67e-15	7.77479	1.32
Ptprn	4.22e-15	73.7	8.98e-18	3.87538	2.46
Nrm	0.00236	14.8	0.000121	2.88623	1.08
Cks2	5.64e-12	58.5	2.02e-14	1.93438	2.94
Fhad1	1.16e-39	191	2.15e-43	3.55413	4.39
LOC684841	0.0276	9.2	0.00242	-1.09462	1.87
Tfpi2	8.55e-05	22.3	2.35e-06	2.88264	1.33
Aurka	0.000415	18.7	1.5e-05	2.75545	1.23
Trpv4	8.98e-05	22.2	2.49e-06	2.46058	1.5
E2f2	0.000618	17.8	2.43e-05	2.51716	1.26
Pf4	8.89e-05	22.2	2.46e-06	4.34374	1.15
Fkbp10	7.49e-07	32.8	9.98e-09	5.03236	1.17
Tubb3	1.53e-07	36.4	1.59e-09	3.12321	1.61
Hilpda	0.00206	15.1	0.000102	1.99382	1.3
Fam167a	1.57e-07	36.4	1.65e-09	2.57515	2.05
LOC103689983	4.96e-06	28.7	8.6e-08	3.17748	3.28
LOC100910370	0.000647	17.7	2.57e-05	4.44398	1.14
AABR07019663.1	0.0345	8.69	0.0032	0.306726	1.32
Tmem8a	0.00966	11.6	0.000668	2.55546	1.1
Chaf1b	2.05e-05	25.5	4.46e-07	1.2121	2.06
Loxl1	7.43e-12	57.9	2.82e-14	6.51033	1.4
Bid	0.00303	14.2	0.000164	3.04142	1.01
Mcm3	1.39e-13	66.4	3.6e-16	4.0845	1.97
Cdkn1a	1.53e-08	41.4	1.23e-10	5.61132	1.24
Acta1	7.91e-38	182	1.71e-41	10.8666	1.79
Raet1d	0.0382	8.45	0.00365	-0.02571	1.26
Haus1	0.0175	10.2	0.00139	1.24414	1.41
Tmem258b	0.00512	13	0.000306	-0.861064	2.45
Nusap1	0.0032	14.1	0.000174	2.30671	1.2
Mdfi	8.84e-06	27.4	1.69e-07	1.64825	1.84
Lxn	2.76e-09	45.2	1.81e-11	3.46121	1.83
Ran	1e-08	42.4	7.63e-11	7.40653	1.14
Cst7	0.00058	18	2.23e-05	2.93018	1.18
Adam12	0.00322	14.1	0.000175	2.18309	2.45
Ube2t	1.43e-06	31.4	2.09e-08	0.480382	2.59
Anxa2	1.16e-20	101	1.11e-23	8.1604	1.66
Siva1	0.000468	18.5	1.72e-05	3.96351	1.04
Ube2c	1.1e-09	47.1	6.7e-12	1.80819	2.65
Aif1	2.88e-07	35	3.38e-09	4.88813	1.38
Cenpm	4.87e-05	23.5	1.22e-06	1.3501	1.98
Rgs16	5.46e-11	53.5	2.6e-13	4.7455	1.53
Ung	1.37e-05	26.4	2.78e-07	3.5527	1.38
Slc25a1	0.00168	15.6	7.89e-05	3.35233	1.06
Cenpo	0.0116	11.2	0.000831	0.335277	1.43
LOC100911110	0.000137	21.2	4.05e-06	5.9267	1.39
Tmem107	2.83e-06	29.9	4.46e-08	1.137	2.3
Melk	1.7e-07	36.1	1.83e-09	1.12483	2.43
Tyrobp	7.24e-13	63	2.1e-15	6.08841	1.72
Prnd	0.0011	16.5	4.8e-05	0.678574	2
Ccdc88b	1.7e-07	36.2	1.82e-09	3.74862	1.49
Gmfg	2.04e-05	25.5	4.42e-07	4.43127	1.23
Tlr2	0.000107	21.8	3.05e-06	3.41661	1.19
Prg4	0.000469	18.5	1.73e-05	3.358	1.12
Cdc7	0.000316	19.4	1.08e-05	1.92498	1.56
Rpl6-ps1	1.28e-05	26.5	2.58e-07	5.24111	1.1
Ssr2	2.69e-08	40.2	2.29e-10	6.09028	1.21
Tgfb1i1	3.09e-07	34.8	3.69e-09	4.85107	1.19
Cd300lf	0.000585	18	2.25e-05	1.82555	1.5
Adamts4	5.32e-36	173	1.48e-39	5.06709	3.48
Rps6	0.000586	18	2.26e-05	3.50304	1.1
Rpl8	0.00977	11.6	0.000676	2.97097	1.03
Gins4	0.000136	21.3	4.01e-06	2.64577	1.38
Bysl	6.51e-05	22.9	1.71e-06	5.04935	1.01
Gap43	0.00692	12.3	0.000448	1.89856	1.23
Rpl31l4	0.00221	14.9	0.000111	3.97478	1.09
Tnfsf9	7.4e-05	22.6	1.98e-06	1.35333	1.82
Hspa1b	1.06e-13	67	2.69e-16	3.76071	2.89
Actg1	1.43e-09	46.6	8.85e-12	8.17388	1.3
Stx3	0.00382	13.7	0.000215	2.78109	1.04
Asf1b	0.00344	13.9	0.000191	1.12757	1.42
Rrp15	3.48e-07	34.5	4.22e-09	3.62407	4.3
Cyth4	1.63e-06	31.1	2.41e-08	5.13496	1.13
Gadd45b	2.56e-05	25	5.78e-07	4.0262	1.16
Exosc6	0.00837	11.9	0.000562	2.65676	1.11
Slc38a4	0.0274	9.22	0.00239	2.05567	1.08
Plaur	1.27e-22	110	1.06e-25	4.55789	2.54
Lrrc25	0.0011	16.5	4.77e-05	3.64703	1.03
Dnajb11	9.11e-07	32.4	1.24e-08	5.93327	1.03
Ltbp2	3.12e-49	235	3.85e-53	5.40604	4.12
Mcm5	2.84e-11	54.9	1.24e-13	4.24501	1.85
Dscc1	2.18e-07	35.6	2.43e-09	1.56763	2.36
Cenpn	1.69e-05	25.9	3.54e-07	2.55937	1.65
Napsa	8.69e-07	32.5	1.18e-08	3.61322	1.5
Plk2	8.69e-06	27.4	1.65e-07	6.27575	1.06
Itgb7	1.22e-05	26.6	2.44e-07	3.30703	1.33
Rrp8	0.000122	21.5	3.52e-06	2.54416	1.7
Mmp12	9.34e-15	72	2.13e-17	1.72997	3.77
Sfxn1	3.81e-05	24.1	9.21e-07	3.59922	1.22
Rangap1	3.59e-09	44.6	2.42e-11	5.53355	1.3
Nek6	0.000158	20.9	4.81e-06	4.32514	1.08
LOC691418	0.0231	9.61	0.00193	1.59907	1.25
Tpm3	1.47e-12	61.5	4.49e-15	7.17763	1.34
Cgref1	0.000248	19.9	8.08e-06	1.27477	1.79
Spi1	9.9e-09	42.4	7.52e-11	5.07776	1.39
Fam72a	0.00176	15.5	8.39e-05	-0.658185	2.33
Cdc20	5.86e-06	28.3	1.05e-07	2.40794	1.67
Fcnb	1.17e-05	26.7	2.32e-07	2.8945	1.59
Ccne1	0.000815	17.2	3.39e-05	0.890958	1.63
Tnni2	0.00656	12.5	0.000417	0.232586	1.58
Fst	2.06e-07	35.7	2.28e-09	1.08356	2.59
Pik3r5	0.0041	13.5	0.000236	2.97148	1.09
Rn50_1_0913.2	0.0301	9.01	0.00269	0.375361	1.37
Ns5atp9	8.25e-11	52.6	4.02e-13	2.04268	2.71
LOC100911881	0.00214	15	0.000107	2.43692	1.66
Tmem119	7.21e-11	52.9	3.49e-13	1.99573	2.62
Cebpa	1.87e-11	55.9	7.79e-14	4.19625	1.8
S100a6	2.38e-11	55.3	1.01e-13	6.58791	1.54
Cars	4.36e-06	29	7.41e-08	4.91488	1.09
Sh3bp2	2.94e-05	24.7	6.85e-07	3.06278	1.34
RGD1561143	7.53e-05	22.6	2.02e-06	-0.0698721	2.39
Igsf8	2.92e-05	24.7	6.8e-07	3.61969	1.27
LOC100364116	0.00623	12.6	0.000391	4.05408	1.08
Gins1	4.2e-07	34.1	5.14e-09	1.70042	2.12
Hnrnpab	0.000329	19.3	1.13e-05	5.91252	1.94
A4galt	0.000642	17.7	2.54e-05	1.01939	1.65
Cep55	1.92e-05	25.6	4.13e-07	1.35648	2.12
Ctrc	5.26e-05	23.4	1.34e-06	1.01992	1.88
Bub1	0.00048	18.4	1.78e-05	2.41126	1.35
Chaf1a	3.6e-07	34.4	4.38e-09	3.26005	1.62
Fbxo5	0.00035	19.1	1.21e-05	1.89272	1.48
Hmox1	1.49e-17	85.5	2.3e-20	5.27961	1.87
LOC100359922	2.35e-06	30.3	3.63e-08	8.62938	1.04
Myof	0.000995	16.7	4.28e-05	5.28158	1.04
Serpinb1a	0.000155	21	4.7e-06	3.03514	1.27
Rrp9	1.85e-08	41	1.51e-10	3.47903	4.65
Spdl1	0.00146	15.9	6.67e-05	1.27677	1.5
S100a11	2.54e-21	104	2.28e-24	6.99787	1.76
Fjx1	4.79e-09	44	3.31e-11	3.25538	1.78
Lcn3	0.00634	12.5	0.000399	-0.498964	1.92
Fcgr3a	0.00178	15.4	8.52e-05	1.56306	1.42
Rrp1b	2.34e-06	30.4	3.61e-08	2.97775	3.49
Slc15a3	0.000426	18.7	1.55e-05	3.88398	1.1
Tubb2b	0.00928	11.7	0.000634	2.20776	1.09
Bgn	2.39e-06	30.3	3.71e-08	7.34135	1
Spred3	4.71e-07	33.9	5.82e-09	3.55048	1.88
Rn50_8_0587.1	0.0272	9.23	0.00238	-0.868941	1.81
Olr1	1e-13	67.2	2.51e-16	2.43875	2.91
Dolpp1	0.00576	12.8	0.000354	2.98405	1.02
Rps18l1	0.000432	18.6	1.57e-05	4.63569	1.17
Hist1h2bk	0.0022	14.9	0.00011	-1.3595	2.99
Angptl4	6.03e-27	130	3.72e-30	4.06414	2.96
Rpl30	2.63e-07	35.2	3.04e-09	7.08661	1.06
Clec4a2	0.0128	10.9	0.000942	1.69542	1.16
Ms4a6c	0.00768	12.1	0.000508	1.43734	1.24
F2rl2	0.0175	10.2	0.00138	0.628714	1.52
LOC689757	0.00222	14.9	0.000112	0.73016	1.53
Rhbg	4e-05	24	9.76e-07	0.334361	2.4
Fstl3	2.08e-26	128	1.35e-29	4.48051	2.8
Nuf2	8.04e-07	32.7	1.07e-08	1.69701	2.12
Irf5	0.000179	20.6	5.58e-06	3.8001	1.14
Abracl	6.79e-09	43.2	5.02e-11	5.27936	1.4
Nxt1	2.75e-06	30	4.31e-08	3.60134	1.51
S100a9	4.83e-10	48.9	2.73e-12	4.93455	1.49
Pafah1b3	0.0021	15	0.000105	2.2654	1.28
Tmem106a	0.000991	16.8	4.25e-05	3.13302	1.07
Rrp12	2.93e-12	59.9	9.77e-15	4.56583	2.5
Fcgr2a	9.94e-07	32.2	1.38e-08	3.16147	1.73
Mcm7	2.79e-05	24.8	6.47e-07	4.85732	1.03
AY172581.9	2.4e-08	40.5	2.01e-10	10.4336	5.43
Fbxw9	0.023	9.63	0.00192	2.25798	1.01
Gpr65	0.021	9.83	0.00172	0.74546	1.28
Ap3s1	0.000191	20.5	6.01e-06	4.16531	1.08
Gng10	7.32e-06	27.8	1.34e-07	5.84132	1.01
Psca	5.73e-06	28.3	1.02e-07	0.504742	2.3
Tmbim1	6.52e-09	43.3	4.69e-11	4.85917	1.35
Exosc5	0.00127	16.2	5.67e-05	3.87308	1.59
Micall2	0.00173	15.5	8.22e-05	3.05869	1.08
Bcat1	6.03e-19	92.1	8.19e-22	4.62415	2.12
AY172581.24	1.59e-07	36.3	1.68e-09	10.5463	2.59
Fgf23	0.03	9.01	0.00268	1.50578	1.47
Emp3	3.01e-11	54.8	1.33e-13	5.61122	1.54
RGD1561778	0.000108	21.8	3.1e-06	3.55721	1.18
Prr13	8.06e-07	32.7	1.08e-08	5.01769	1.2
Myo1f	1.1e-05	26.9	2.14e-07	4.68895	1.14
Ftl1	0.000165	20.8	5.06e-06	3.15734	1.26
Dynll1	2.93e-08	40	2.52e-10	7.30964	1.14
Lif	6.64e-07	33.1	8.71e-09	0.679924	3.67
G6pd	9.22e-05	22.1	2.57e-06	4.94554	1.02
Pram1	2.96e-06	29.8	4.71e-08	2.31762	1.83
Cd14	3.2e-07	34.7	3.84e-09	4.56295	1.3
Mthfd1l	3.49e-06	29.5	5.7e-08	3.26615	1.43
Cenpa	0.000544	18.1	2.07e-05	1.16203	1.63
Exo5	0.000845	17.1	3.53e-05	3.1402	1.11
Pbk	1.2e-10	51.8	6.06e-13	1.24221	3.07
Knstrn	1.15e-07	37	1.16e-09	1.4316	2.37
Lsp1	1.98e-10	50.8	1.05e-12	6.0581	1.35
Sema3f	1.03e-09	47.3	6.19e-12	5.23456	1.45
Rcc1	3.28e-06	29.6	5.32e-08	3.69383	1.36
Ltb4r	2.78e-07	35	3.24e-09	1.91832	2.26
Plek	5.05e-05	23.4	1.28e-06	3.52438	1.28
Rac2	2.09e-05	25.4	4.57e-07	4.47881	1.16
Glipr2	0.00254	14.6	0.000132	2.70535	1.09
Cfl1	2.36e-16	79.6	4.52e-19	8.73434	1.39
Ydjc	0.00951	11.6	0.000654	2.1011	1.16
Trem3	0.000141	21.2	4.2e-06	0.107891	2.11
Mybl2	6.08e-13	63.3	1.75e-15	2.38846	2.87
Tgfbi	3.21e-10	49.8	1.73e-12	6.43	1.23
Vamp5	3.82e-05	24.1	9.26e-07	4.89379	1.13
Vcan	4.53e-08	39.1	4.06e-10	6.61881	1.16
Mllt11	3.1e-08	39.9	2.7e-10	4.44122	1.5
Creld2	7.18e-17	82.1	1.26e-19	5.15712	1.89
Fam132b	0.00028	19.7	9.25e-06	-0.234514	2.87
Plau	2.44e-17	84.4	4e-20	3.26651	3.03
Fgd3	0.00164	15.6	7.68e-05	3.58292	1
Fosl1	2.19e-07	35.6	2.46e-09	2.48706	1.98
Prc1	1.89e-11	55.8	7.94e-14	2.66146	2.4
Hsd17b1	0.0127	11	0.000934	0.447038	1.42
Ccl17	0.000977	16.8	4.18e-05	-0.487499	2.22
Plk3	8.34e-07	32.6	1.12e-08	3.1922	1.54
Grap	0.00737	12.2	0.000483	2.58256	1.03
Atf3	1.9e-07	35.9	2.07e-09	3.94288	1.44
Ier5l	2.84e-09	45.1	1.88e-11	5.2284	1.44
Ddx39a	1.15e-07	37	1.16e-09	5.44983	1.21
LOC100361259	0.00984	11.5	0.000683	1.09048	1.4
Plpp2	0.000543	18.1	2.06e-05	0.459094	1.78
Pdpn	5.98e-07	33.4	7.66e-09	4.58628	1.27
Il1r2	4.08e-05	23.9	1e-06	1.59767	1.85
Armc6	1.69e-07	36.2	1.79e-09	3.83095	1.5
Arntl	0.0026	14.6	0.000136	3.46905	1.02
Pak1	2.82e-11	55	1.23e-13	2.89656	2.31
Prr5l	0.0194	10	0.00157	1.78856	1.15
Hsd17b12	0.000112	21.7	3.21e-06	4.54985	1.02
Rpl3	2.27e-13	65.5	5.95e-16	8.52096	1.28
Clic1	4.03e-19	93	5.35e-22	6.99666	1.69
Jaml	0.00903	11.7	0.000614	2.47704	1.05
Rad54l	0.000966	16.8	4.13e-05	1.03012	1.65
Csf2ra	3.22e-09	44.8	2.13e-11	5.5383	1.31
LOC100362342	0.00994	11.5	0.000693	1.49356	1.29
Cacnb1	0.0286	9.12	0.00253	1.2684	1.25
Tuba1a	4.18e-12	59.2	1.46e-14	7.33887	1.5
Tbxas1	0.00122	16.3	5.43e-05	2.58781	1.2
Myl1	0.0004	18.8	1.44e-05	2.22746	1.38
LOC680920	0.0457	8.04	0.00457	-0.579663	1.52
Cnpy3	6.97e-06	27.9	1.27e-07	5.13372	1.06
Gale	1.04e-08	42.3	7.95e-11	3.83829	1.57
Pttg1	0.000611	17.9	2.39e-05	0.572344	1.75
LOC100362751	0.000622	17.8	2.45e-05	3.90265	1.22
Pnmt	0.000915	16.9	3.88e-05	0.294435	1.89
Myc	1.52e-15	75.8	3.15e-18	4.61437	1.91
Skap2	9.38e-05	22.1	2.63e-06	4.2166	1.11
Actg2	1.47e-08	41.5	1.17e-10	3.62555	1.71
Haus7	0.000612	17.8	2.4e-05	3.272	1.07
LOC103693683	0.000345	19.2	1.19e-05	0.668109	3.88
Bmp4	0.000984	16.8	4.22e-05	3.56583	1.02
Aard	0.000178	20.6	5.53e-06	-0.121011	2.2
RGD1562114	1.51e-05	26.2	3.09e-07	3.55551	1.36
Arg1	1.68e-14	70.8	3.95e-17	2.42751	2.82
Bin2	6.98e-07	33	9.24e-09	3.46735	1.47
Cdt1	0.000156	20.9	4.74e-06	2.68865	1.44
Sele	2.58e-06	30.1	4.02e-08	4.06086	1.4
Ndn	0.00128	16.2	5.73e-05	2.18328	1.29
Mest	0.000621	17.8	2.45e-05	2.97507	1.36
Nol12	1.15e-05	26.8	2.27e-07	3.86782	1.32
Tnfrsf11b	0.000131	21.3	3.84e-06	2.76926	1.34
Tnc	9.02e-32	153	4.17e-35	5.91362	2.59
Mpg	0.0231	9.61	0.00193	2.20535	1.05
Slc25a24	1.52e-05	26.2	3.13e-07	4.47439	1.14
Procr	4.04e-12	59.2	1.4e-14	4.614	1.69
Arhgdia	4.74e-10	48.9	2.66e-12	8.56016	1.09
Lmnb1	3.86e-06	29.2	6.46e-08	3.42693	1.38
Dok3	2.87e-07	35	3.36e-09	3.06571	1.65
Slc7a5	2.25e-07	35.5	2.56e-09	4.17241	1.45
Klf10	2.27e-10	50.5	1.2e-12	4.62166	1.52
AABR07013701.1	0.000208	20.3	6.63e-06	0.0520865	2.33
Tes	1.15e-05	26.8	2.26e-07	4.17133	1.23
Arl5c	0.0153	10.5	0.00117	0.959532	1.37
LOC100360573	9.45e-05	22.1	2.65e-06	5.87998	1.03
Hck	5.2e-07	33.7	6.52e-09	3.82377	1.5
Krt4	5.84e-07	33.4	7.42e-09	0.419696	3.37
Nilr1	0.000613	17.8	2.41e-05	1.77776	1.5
Cdr2	6.26e-06	28.2	1.12e-07	3.84903	1.3
Plk1	1.97e-06	30.7	2.98e-08	1.63472	2.15
Shcbp1	1.58e-06	31.2	2.33e-08	1.06941	2.45
Atp1b3	2.04e-07	35.7	2.26e-09	6.81375	1.08
Krt75	8.58e-05	22.3	2.36e-06	0.455644	2.09
Rnd1	1.28e-16	80.9	2.33e-19	5.0603	1.85
Tmem150b	0.0304	8.98	0.00273	1.4688	1.1
Trh	2.57e-05	25	5.85e-07	2.37366	1.55
Sh3bgrl3	2.34e-09	45.5	1.52e-11	6.01363	1.41
Spag5	0.00052	18.2	1.95e-05	1.6094	1.76
Tspan5	0.000673	17.6	2.7e-05	3.46548	1.11
Cthrc1	0.0166	10.3	0.0013	1.27098	1.25
Csf2rb	0.0016	15.7	7.46e-05	4.88156	1.25
Evi2b	0.00089	17	3.76e-05	2.30158	1.29
Amdhd2	5.68e-06	28.4	1.01e-07	3.84521	1.32
Lilrb4	1.03e-25	124	6.98e-29	5.0138	2.72
Ttk	1.13e-07	37.1	1.12e-09	1.22419	2.93
Six2	0.000287	19.6	9.58e-06	0.0255295	2.18
Timp1	2.57e-31	151	1.27e-34	6.63088	2.41
RGD1561252	7.36e-05	22.6	1.97e-06	2.72109	2.01
Cdc6	1.45e-09	46.5	8.99e-12	1.44438	2.72
LOC100361008	3.8e-12	59.4	1.3e-14	5.86755	1.74
Cenpt	6.52e-06	28.1	1.17e-07	1.12433	2.44
Orc6	0.000389	18.9	1.39e-05	1.95602	1.49
Ppial4d	1.05e-11	57.1	4.13e-14	5.51282	3.25
S100a10	9.82e-13	62.3	2.94e-15	7.2357	1.54
Bst1	0.00227	14.9	0.000115	3.27406	1.05
Cdk1	5.22e-12	58.7	1.84e-14	2.53404	2.62
Rpl18	1.81e-06	30.9	2.71e-08	8.78497	1.05
Basp1	3.2e-06	29.6	5.18e-08	4.70223	1.15
AABR07011951.1	4.33e-05	23.8	1.07e-06	3.69958	3.61
Rpl34-ps1	0.00256	14.6	0.000134	3.18684	1.06
Msn	1.51e-06	31.3	2.21e-08	8.39413	1.06
Clec4e	3.46e-06	29.5	5.64e-08	1.33455	2.14
LOC103689927	0.000286	19.6	9.5e-06	0.720678	2.5
Csrp1	1.59e-08	41.3	1.28e-10	7.65982	1.06
Pum3	3.79e-06	29.3	6.31e-08	4.59827	1.22
Serinc2	0.000882	17	3.72e-05	2.92674	1.15
Cd44	1.01e-10	52.2	5.04e-13	5.48218	1.37
Tnfrsf26	0.000122	21.5	3.54e-06	4.33747	1.08
Gemin6	0.000193	20.5	6.09e-06	2.02467	1.53
Il1b	0.000612	17.8	2.4e-05	2.50655	1.34
Ptpn7	0.000856	17.1	3.58e-05	3.2953	1.06
Nop16	2.98e-05	24.6	6.98e-07	5.08583	1.03
Psat1	5.06e-09	43.9	3.51e-11	1.91068	2.53
Gadd45g	1.07e-22	110	8.59e-26	6.53339	1.96
Arpc3	6.8e-07	33.1	8.98e-09	5.63422	1.11
Mcm4	2.38e-06	30.3	3.68e-08	4.12532	1.29
Akr1b8	7.04e-15	72.7	1.54e-17	5.08345	1.82
Fscn1	2.48e-07	35.3	2.85e-09	5.37927	1.21
Phlda3	2.01e-08	40.8	1.67e-10	5.89278	1.19
Tax1bp3	1.2e-06	31.8	1.69e-08	6.13098	1.02
Vwa1	3.79e-12	59.4	1.29e-14	6.11309	1.41
Ccl4	0.00915	11.7	0.000624	0.684921	1.38
Qtrt1	0.0125	11	0.000917	2.41483	1.05
Selp	5.4e-10	48.6	3.08e-12	3.27268	1.96
Ada	2.9e-06	29.9	4.58e-08	5.12844	1.14
Ramp1	0.00112	16.5	4.88e-05	1.57683	1.47
Ramp3	0.000654	17.7	2.59e-05	1.46664	1.65
Cmss1	5.12e-05	23.4	1.31e-06	2.3621	1.59
Msmo1	7.82e-06	27.6	1.45e-07	4.21851	1.25
Znrd1	0.000159	20.9	4.85e-06	3.99433	1.14
Cd8b	3.87e-06	29.2	6.48e-08	0.173012	2.68
Ppp2r1b	3.02e-05	24.6	7.08e-07	3.9715	1.17
Klhl6	0.00017	20.7	5.26e-06	3.36232	1.28
LOC100360491	3.17e-05	24.5	7.5e-07	3.16752	1.44
Asns	0.00251	14.6	0.00013	1.86387	1.31
Kcne1	0.00199	15.2	9.71e-05	-0.454757	2.44
Gngt2	9.93e-07	32.2	1.38e-08	4.99891	1.22
Plod2	1.55e-12	61.3	4.89e-15	6.00188	1.49
Me2	0.00039	18.9	1.4e-05	4.0423	1.06
Fibin	0.000103	21.9	2.92e-06	4.31668	1.08
Tcea2	0.00705	12.3	0.000458	1.88133	1.23
Gpn2	0.00149	15.8	6.87e-05	3.38683	1.01
Mcemp1	1.37e-13	66.5	3.51e-16	2.70567	2.6
Txn1	5.11e-07	33.7	6.37e-09	7.4266	1.05
Sqle	0.00016	20.9	4.88e-06	3.325	1.23
Mki67	6.77e-08	38.2	6.44e-10	3.91047	1.74
Krt1	0.00165	15.6	7.71e-05	3.29535	1.06
RT1-S2	0.0064	12.5	0.000405	-0.0770387	2.83
Anp32b	6.15e-07	33.3	7.91e-09	6.62181	1.01
Ccr1	0.00292	14.3	0.000156	3.4919	1.24
Rcc2	0.00101	16.7	4.33e-05	4.1046	1.11
Efhd2	5.49e-11	53.5	2.62e-13	6.35471	1.28
Tbcb	0.000509	18.3	1.91e-05	1.99007	3.26
Btk	0.0195	9.98	0.00158	1.97396	1.14
Adam8	2.32e-10	50.4	1.24e-12	3.37084	2.03
Lrp8	0.000377	19	1.34e-05	2.78095	1.52
Cdh24	0.0456	8.05	0.00456	1.41954	1.28
Prim2	0.000799	17.2	3.32e-05	2.2291	1.34
Evi2a	1.34e-05	26.5	2.7e-07	2.96179	1.43
Slc16a3	2.92e-32	155	1.24e-35	4.44935	3.27
Dhh	0.000755	17.3	3.11e-05	1.43594	1.6
LOC102551435	9e-05	22.2	2.5e-06	2.5319	1.58
Tnfaip8l2	0.000151	21	4.57e-06	3.74029	1.17
RGD1563812	0.0313	8.92	0.00283	1.46488	1.15
Was	0.00753	12.1	0.000496	2.74455	1.01
Rpa2	0.000191	20.5	6e-06	3.86441	1.14
Fen1	6.84e-08	38.2	6.53e-10	3.20109	1.68
Nop2	6.06e-07	33.3	7.78e-09	3.96012	2.87
Ccl7	1.07e-16	81.3	1.92e-19	4.87427	2.03
Krt79	0.00688	12.3	0.000443	1.92623	1.27
Flnc	7.71e-12	57.8	2.97e-14	9.45419	1.21
Thg1l	0.000598	17.9	2.32e-05	3.13903	1.11
RGD1566369	0.0147	10.6	0.00112	1.79529	1.21
LOC690422	5.08e-06	28.6	8.87e-08	3.19151	1.45
Scimp	1.21e-07	36.9	1.23e-09	2.41306	1.92
Snrpa	5.11e-08	38.8	4.71e-10	4.0894	1.5
LOC308990	0.0149	10.6	0.00114	2.07041	1.17
Cd3eap	6.67e-10	48.2	3.83e-12	3.257	1.98
Lox	6.18e-17	82.5	1.07e-19	5.3307	1.87
Bcl2a1	3.68e-08	39.5	3.24e-10	3.62536	1.75
LOC100361457	6.8e-06	28	1.23e-07	6.07317	1
RGD1561333	0.00412	13.5	0.000237	-0.529417	2.16
Mad2l1bp	0.012	11.1	0.000869	2.39379	1.09
Prrx2	0.0136	10.8	0.00102	1.51194	1.34
Xirp2	2.51e-16	79.5	4.88e-19	9.49528	1.49
Mt1	0.000908	16.9	3.84e-05	4.07919	1.05
Nppa	6.83e-74	351	2.11e-78	9.50515	3.19
Cytip	0.00172	15.5	8.13e-05	2.94623	1.09
Tagln	3.61e-06	29.4	5.94e-08	6.49052	1.01
Nptxr	2.57e-09	45.3	1.68e-11	2.75852	2.16
Mif	0.00112	16.5	4.91e-05	2.33013	1.87
Nip7	8.69e-06	27.4	1.64e-07	3.89446	1.3
Ndrg1	1.14e-06	31.9	1.6e-08	5.64601	1.05
LOC102555453	1.03e-05	27	1.99e-07	5.45462	2.36
Pkmyt1	0.0157	10.5	0.00122	1.63157	1.14
Rbm3	5.18e-08	38.8	4.81e-10	7.21365	1.08
Pstpip1	2.44e-11	55.3	1.05e-13	4.30501	1.82
Ppib	1.2e-06	31.8	1.7e-08	7.25505	1.06
Arpc5	1.68e-08	41.2	1.37e-10	6.75984	1.09
Magohb	0.012	11.1	0.000863	2.64108	1.03
Pgf	3.99e-06	29.1	6.7e-08	2.3133	1.72
Anln	0.0166	10.3	0.0013	1.60614	1.62
Vgll3	0.0278	9.19	0.00244	1.87194	1.07
Msr1	0.000369	19	1.3e-05	3.71285	1.25
Ccl12	1.52e-10	51.3	7.89e-13	2.24126	2.7
Kif22	1.45e-08	41.6	1.14e-10	2.55314	2.07
Chst1	9.82e-12	57.2	3.85e-14	3.85751	1.88
Slc39a11	0.000296	19.5	9.95e-06	2.63529	1.36
Rps15al4	0.0072	12.2	0.000471	2.08795	2.1
Tubb5	6.06e-15	73	1.31e-17	8.50668	1.33
Trib3	0.00131	16.1	5.88e-05	0.981734	1.59
Rab32	0.000136	21.3	4.02e-06	3.9872	1.07
Slc11a1	9.62e-05	22	2.7e-06	2.95948	1.28
Bop1	2.53e-05	25	5.69e-07	4.58239	1.09
Tk1	1.54e-07	36.4	1.61e-09	3.60869	1.55
RGD1309350	0.0472	7.97	0.00476	-0.441692	1.4
Tma16	0.0325	8.83	0.00297	2.66398	1.12
Skp2	0.000119	21.6	3.42e-06	1.27382	1.89
Sh2b2	5.67e-05	23.2	1.47e-06	2.2165	1.61
Wfdc2	0.00383	13.7	0.000216	1.18438	1.47
LOC24906	2.32e-10	50.4	1.24e-12	2.33681	2.49
Gtse1	8.83e-06	27.4	1.68e-07	1.27442	2.06
Coro1a	9.21e-10	47.5	5.42e-12	5.74035	1.38
Egr2	1.34e-05	26.4	2.71e-07	2.57052	1.54
Nfam1	1.6e-05	26.1	3.32e-07	3.81957	1.31
Actn1	1.9e-14	70.5	4.51e-17	6.86053	1.66
Gpnmb	7.91e-25	120	5.61e-28	7.02927	1.95
Ube2q2l	0.00554	12.8	0.000339	1.56138	1.35
Trem2	0.00191	15.3	9.23e-05	2.90405	1.13
Ankle1	5e-06	28.6	8.7e-08	1.54766	2.47
Igsf7	0.0335	8.76	0.00308	1.00799	1.1
Nppb	4.01e-14	69	9.79e-17	8.88414	1.47
Tgfb2	2.73e-24	118	2.02e-27	5.73685	2.08
Cd300le	7e-06	27.9	1.28e-07	4.91564	1.16
C5ar1	5.77e-06	28.3	1.03e-07	4.18828	1.25
Rpsa	1.15e-07	37	1.16e-09	9.53742	1.14
Gdf6	6.33e-12	58.2	2.33e-14	1.52808	3.28
Sdf2l1	7.78e-08	37.9	7.52e-10	5.1143	1.37
Serpinh1	3.85e-10	49.4	2.11e-12	8.90466	1.05
Fam110d	7.95e-08	37.8	7.73e-10	4.78729	1.44
Lsm4	7e-08	38.1	6.74e-10	6.05585	1.26
Clec12a	0.000673	17.6	2.69e-05	2.21142	1.42
Trim7	0.00045	18.6	1.65e-05	3.29414	-1.55
Esr1	0.0133	10.8	0.000991	1.04485	-1.34
Dgke	0.0121	11.1	0.000876	4.61562	-1.26
Tcaim	9.59e-06	27.2	1.85e-07	4.35893	-1.51
Slc2a12	0.00504	13.1	0.000301	3.16471	-1.05
Acss1	6.03e-17	82.6	1.02e-19	7.80907	-1.56
Clcn4	2.25e-07	35.5	2.55e-09	3.65125	-1.61
Ogn	0.000709	17.5	2.87e-05	1.20062	-3.61
Nebl	6.21e-07	33.3	8.03e-09	6.38979	-2.3
Bche	1.91e-07	35.9	2.09e-09	5.287	-1.22
Pard3b	0.0232	9.6	0.00194	2.99654	-1.36
Fndc5	1.86e-07	36	2.02e-09	6.26986	-1.1
Klhl38	0.00047	18.5	1.73e-05	3.96685	-1.01
Fyco1	8.16e-08	37.8	7.96e-10	6.67316	-1.25
Cdnf	1.07e-09	47.2	6.46e-12	6.20592	-1.24
Epha7	1.82e-05	25.8	3.87e-07	1.18219	-2.15
AABR07064111.1	5.89e-05	23.1	1.53e-06	1.66639	-1.86
Tmtc1	0.0147	10.6	0.00112	3.88287	-1.38
Fry	0.0039	13.6	0.000221	6.81755	-1.06
Sspn	6.34e-12	58.2	2.35e-14	6.08332	-1.96
Ehhadh	0.00203	15.1	9.98e-05	2.5265	-1.12
Efnb3	1.14e-07	37.1	1.14e-09	6.11319	-1.14
Rimkla	0.0032	14.1	0.000174	0.443789	-1.68
LOC100910708	0.0153	10.5	0.00118	0.107939	-1.8
Foxn3	0.0256	9.37	0.00221	4.29981	-1.47
Thrb	0.000147	21.1	4.39e-06	5.02359	-1.16
Esrrb	0.000568	18	2.18e-05	2.22178	-1.6
Ptgfr	4.72e-08	39	4.26e-10	6.79233	-1.32
Ate1	0.00366	13.8	0.000205	4.29499	-1.18
Phkg1	0.00751	12.1	0.000495	1.93283	-1.28
Ky	5.18e-13	63.7	1.47e-15	4.68811	-1.79
Oxct1	1.64e-10	51.2	8.56e-13	10.019	-1.02
Irs1	6.67e-05	22.8	1.76e-06	3.69686	-1.74
Ust	0.0267	9.28	0.00232	2.71687	-1.19
Plxnb1	0.0405	8.32	0.00392	6.16849	-1.08
Smyd1	3.86e-11	54.2	1.77e-13	6.91805	-1.5
Ntn4	9.85e-05	22	2.78e-06	4.95712	-1.3
Adh6	0.00382	13.7	0.000215	2.50111	-1.11
Per3	0.00195	15.2	9.51e-05	5.61801	-1.28
Ccpg1	1.98e-06	30.7	3.01e-08	6.68542	-1.03
Rbfox1	7.95e-13	62.8	2.33e-15	5.3401	-1.54
Tbc1d4	0.00406	13.5	0.000233	5.13305	-1.21
Ppp1r12b	0.00321	14.1	0.000175	6.912	-1.38
Ntn1	0.0194	9.99	0.00158	4.64208	-1.37
Zbtb20	0.0109	11.3	0.000778	4.25724	-1.63
Cacna1c	0.00039	18.9	1.4e-05	6.64998	-1.06
Mettl11b	7.36e-06	27.8	1.35e-07	3.80038	-1.29
Ccdc68	0.022	9.72	0.00182	0.236374	-1.34
Bcl7a	0.000312	19.4	1.06e-05	1.44691	-1.76
Tecrl	1.43e-06	31.4	2.09e-08	5.27058	-1.45
Nxpe1	0.000179	20.6	5.59e-06	4.72901	-1.28
Mapre2	3.44e-07	34.5	4.17e-09	2.77446	-1.88
RGD1311756	3.05e-08	39.9	2.65e-10	5.08305	-1.34
Prob1	0.004	13.6	0.000229	3.87473	-1.47
P2ry1	0.00299	14.2	0.000161	3.37639	-1.06
AABR07067506.1	0.0132	10.9	0.000973	2.99877	-1.68
Ptprd	0.00103	16.7	4.45e-05	5.82906	-1.2
Fign	0.0101	11.5	0.000703	2.05901	-1.61
RGD1562652	0.0114	11.2	0.000819	-0.164088	-1.74
Adprhl1	0.0493	7.86	0.00505	4.92357	-1.45
Sptb	0.000567	18	2.17e-05	5.71104	-2.02
Cacnb2	0.000536	18.2	2.02e-05	4.95913	-1.35
Ppm1k	2.24e-07	35.5	2.53e-09	5.22785	-1.76
Ubr3	0.00271	14.5	0.000143	6.06392	-1.25
RT1-CE16	0.0428	8.19	0.00421	1.0292	-1.36
RGD1564899	0.000393	18.9	1.41e-05	5.99942	-1.19
Camk2g	0.00342	13.9	0.000189	1.47894	-2
Igdcc4	0.024	9.52	0.00203	3.78407	-1.39
Pygb	1.39e-09	46.6	8.55e-12	7.24886	-1.56
Akap7	0.0371	8.53	0.0035	2.47528	-1.09
Synpo2	0.00429	13.4	0.000249	6.64586	-1.25
Tbx20	0.00518	13	0.000311	4.21105	-1.9
Asb10	1.21e-07	36.9	1.24e-09	3.5318	-1.58
Mamdc2	0.00437	13.4	0.000255	2.72948	-1.08
Syt14	2.14e-05	25.4	4.69e-07	1.25449	-2.19
Ddn	4.18e-05	23.9	1.03e-06	1.90582	-1.77
Fem1a	7.71e-06	27.7	1.43e-07	6.65506	-1.21
Myh7	5.45e-18	87.6	7.93e-21	12.6265	-1.2
Myom2	9.14e-15	72.1	2.06e-17	10.8232	-1.25
Pkhd1l1	0.0337	8.74	0.00311	4.25995	-1.09
Sh3rf3	3.21e-05	24.5	7.61e-07	2.31536	-1.93
Fbxl17	0.000566	18	2.16e-05	5.11593	-1.24
Nf1x	0.0326	8.82	0.00298	4.62278	-1.26
Wwc1	0.0304	8.98	0.00273	1.53414	-1.2
LOC100912445	0.00581	12.7	0.000359	1.03264	-2.84
RGD1563072	0.00389	13.6	0.000221	-0.689692	-1.98
Arhgap44	0.0277	9.19	0.00243	4.24679	-1.15
Sntb1	0.000293	19.5	9.83e-06	4.15308	-1.63
Asb15	0.000944	16.9	4.01e-05	5.66867	-1.42
AABR07025284.1	0.0021	15.1	0.000104	1.46882	-1.5
Alpk2	2.09e-05	25.4	4.56e-07	6.27899	-1.24
Veph1	2.24e-05	25.3	4.94e-07	3.09473	-1.43
Lynx1	3.03e-06	29.8	4.88e-08	5.41041	-1.04
Slc25a23	0.000554	18.1	2.11e-05	4.65106	-1.23
Pbld1	0.00423	13.4	0.000245	2.24303	-1.2
Iqsec1	0.000385	18.9	1.37e-05	6.23835	-1.04
Lysmd4	0.00439	13.4	0.000256	3.49556	-1.02
Vwa8	0.000122	21.5	3.56e-06	1.40783	-2.05
Nav3	0.0435	8.16	0.00429	4.5087	-1.38
Lsmem1	2.31e-07	35.4	2.63e-09	4.10161	-1.43
Zmat1	0.00961	11.6	0.000663	2.75255	-1.09
Cxadr	0.012	11.1	0.000865	4.06427	-1.18
Gprin3	1.5e-07	36.5	1.56e-09	2.5619	-2.25
Fbxw10	1.2e-06	31.8	1.71e-08	2.68038	-1.67
Kcnd3	0.00194	15.3	9.4e-05	3.86191	-1.17
Tnni3k	7.73e-09	42.9	5.79e-11	6.78768	-1.12
Myom3	0.000366	19	1.29e-05	3.2232	-1.12
Eml1	0.00526	13	0.000317	5.14224	-1.11
Nrxn1	0.0377	8.49	0.00358	1.15913	-1.24
Pkia	3.16e-05	24.5	7.45e-07	6.88854	-1.41
Rab40b	0.00698	12.3	0.000453	2.15359	-1.12
AC096809.1	0.00204	15.1	0.000101	2.99253	-1.28
Dlc1	0.0405	8.32	0.00392	6.34988	-1.01
Ddx58	0.0487	7.89	0.00498	3.11166	-1.06
Irx1	0.00238	14.8	0.000122	2.47036	-1.19
Myh7b	8.32e-05	22.3	2.28e-06	7.23421	-1.14
Adra1a	0.000685	17.6	2.76e-05	3.91198	-1.79
Nt5c1a	3.15e-07	34.7	3.78e-09	1.25573	-2.93
Cdh23	0.047	7.98	0.00474	4.58486	-1.02
Kcnk2	0.00063	17.8	2.49e-05	3.62036	-1.08
Ptpn3	2.42e-08	40.4	2.03e-10	7.21467	-1.12
Cds2	0.023	9.63	0.00192	4.44074	-1.24
Kcnn3	0.023	9.63	0.00191	2.34555	-1.02
Ppara	2.12e-06	30.6	3.24e-08	2.98024	-2.05
Wnk2	2.09e-05	25.4	4.58e-07	6.0177	-1.22
Dbt	6.78e-07	33.1	8.93e-09	6.31954	-1.03
Mylk3	6.44e-08	38.3	6.08e-10	8.09942	-1.11
Pde4c	0.00609	12.6	0.00038	3.39128	-1.14
Camk2a	0.014	10.7	0.00105	2.84383	-1.29
Tmem71	0.00697	12.3	0.000452	1.89099	-1.18
Rn50_5_0791.1	0.039	8.41	0.00373	0.84951	-2.18
Nap1l5	0.00649	12.5	0.000412	0.856992	-1.5
Lbh	0.000293	19.5	9.84e-06	6.2684	-1.1
Usp13	3.35e-07	34.6	4.04e-09	7.48654	-1.02
Clasp1	0.0325	8.82	0.00297	4.863	-1.32
Ganc	0.00338	14	0.000187	3.66481	-1.25
Pde4dip	5.18e-08	38.8	4.8e-10	9.57464	-1.12
Aox1	0.00166	15.6	7.78e-05	3.85714	-1.14
Gata5	0.000121	21.5	3.5e-06	4.55854	-1.06
Iqgap2	1.74e-06	31	2.59e-08	4.45989	-1.79
Tmem179	5.3e-08	38.7	4.95e-10	5.98175	-1.13
Ppp2r3a	6.68e-06	28	1.21e-07	6.25285	-1.33
Srrm4	0.0103	11.4	0.000723	1.1692	-1.88
Limch1	0.00062	17.8	2.44e-05	5.34676	-1.41
Prkaa2	1.7e-07	36.2	1.81e-09	4.772	-2.27
Pdpr	0.000109	21.7	3.13e-06	4.24746	-1.52
LOC100911951	0.00766	12.1	0.000506	2.7392	-1.07
Phactr1	0.00036	19.1	1.26e-05	2.5528	-1.77
Lpin1	3.05e-05	24.6	7.16e-07	4.56577	-1.66
Cdh20	0.0181	10.2	0.00144	2.33495	-1.01
Ypel1	0.0187	10.1	0.0015	-0.353809	-1.58
Zc2hc1c	0.0115	11.2	0.000826	1.54571	-1.19
Hipk2	4.7e-08	39	4.24e-10	5.54015	-2.18
Mut	5.61e-09	43.6	3.95e-11	6.41466	-1.19
Kcna2	7.25e-20	96.7	8.06e-23	3.48684	-2.69
Ccnd2	0.000224	20.1	7.21e-06	5.27273	-1.46
Mpp7	0.0021	15.1	0.000104	2.9963	-1.16
Ank2	1.28e-05	26.5	2.58e-07	4.99269	-2.22
Hipk3	0.0404	8.33	0.00389	5.79984	-1.16
Trabd2b	8.93e-06	27.3	1.71e-07	2.80299	-1.85
Zhx2	0.0144	10.7	0.00109	3.52005	-1.04
Adam11	0.00437	13.4	0.000255	2.62306	-1.3
Slco5a1	0.000964	16.8	4.11e-05	2.55217	-1.75
Mrgbp	0.0454	8.06	0.00454	-0.515643	-3.44
Dnajc28	0.000229	20.1	7.4e-06	2.83703	-1.31
Ctnna3	0.0442	8.12	0.00437	1.7872	-1.21
Slc25a21	0.0281	9.16	0.00247	0.914838	-1.18
Atp4a	3.17e-12	59.8	1.07e-14	2.7373	-2.34
Scn4b	2.04e-19	94.4	2.58e-22	5.81669	-1.93
Hist1h1b	0.0238	9.54	0.00201	-0.686952	-1.7
Zfp316	0.0445	8.1	0.00442	1.80238	-1.09
Irx5	3.81e-05	24.1	9.23e-07	4.69877	-1.04
LOC100910978	0.0069	12.3	0.000445	1.55582	-2.05
Abhd18	3.02e-06	29.8	4.84e-08	4.97878	-1.18
Natd1	0.0249	9.44	0.00213	-0.495787	-3.45
Gbas	6.69e-09	43.2	4.87e-11	6.90875	-1.21
Tmem116	7.5e-06	27.7	1.38e-07	3.48774	-1.33
Acadsb	0.0451	8.07	0.0045	4.55459	-1.04
Clip4	1.68e-07	36.2	1.78e-09	3.46858	-2.03
Sobp	0.0064	12.5	0.000404	3.26665	-1.22
Prkce	0.000742	17.4	3.04e-05	3.19471	-1.87
AABR07030521.1	0.0146	10.6	0.00111	1.41533	-1.18
Piwil2	4.7e-09	44	3.23e-11	3.6673	-1.7
Klf9	0.0232	9.6	0.00194	5.74476	-1.08
Ddx60	0.0297	9.04	0.00264	2.86872	-1.16
Kcnj3	1.19e-07	36.9	1.21e-09	3.1827	-2.05
Tas2r120	1.15e-05	26.8	2.26e-07	0.727569	-2.1
Hdac11	0.00184	15.4	8.84e-05	2.85066	-1.13
RGD1311251	0.0426	8.2	0.00419	0.618878	-1.15
A930018M24Rik	0.0405	8.33	0.00391	0.0772494	-1.72
Dsp	2.25e-09	45.6	1.45e-11	9.28628	-1.32
Foxo6	0.0241	9.52	0.00204	1.27013	-1.12
Usp2	1.86e-05	25.7	3.98e-07	4.79169	-1.49
Ccser2	0.0343	8.7	0.00318	3.8311	-1.13
Iqca1	0.000102	21.9	2.89e-06	2.11747	-2.09
Selenbp1	0.000488	18.4	1.82e-05	3.51471	-1.67
Fam78a	0.0156	10.5	0.0012	3.51652	-1.06
Dennd1b	0.0251	9.41	0.00216	2.46882	-1.47
AABR07052585.1	0.0163	10.4	0.00127	3.4358	-1.47
LOC100911356	0.0228	9.65	0.00189	1.41011	-1.36
Tns1	0.047	7.97	0.00474	8.40099	-1.39
Jph2	2.16e-07	35.6	2.4e-09	7.31437	-1.36
AABR07065498.1	0.000367	19	1.29e-05	3.01531	-1.5
Pde7b	0.00248	14.7	0.000128	2.17661	-1.36
Aspdh	0.000611	17.9	2.38e-05	0.670545	-1.82
LOC499229	0.039	8.41	0.00373	3.13321	-1.4
RGD1561161	0.00383	13.7	0.000217	3.49586	-1.22
St6galnac2	2.99e-07	34.9	3.55e-09	4.55247	-1.38
Pdk2	3.34e-09	44.8	2.23e-11	6.44946	-1.46
Ano5	2.04e-05	25.5	4.41e-07	2.55196	-2.49
Agl	6.79e-09	43.2	5.02e-11	7.34219	-1.2
Snx22	0.000508	18.3	1.9e-05	1.52973	-1.72
Lrba	0.00208	15.1	0.000103	5.21918	-1.06
Nacc2	0.00253	14.6	0.000131	4.3929	-1.32
Corin	0.00382	13.7	0.000215	5.29053	-1.16
Fads6	0.00173	15.5	8.18e-05	3.31568	-1.03
Abca9	0.0334	8.77	0.00306	2.2563	-1.3
Fbxo40	4.32e-05	23.8	1.07e-06	5.01517	-1.43
Pdha1l1	0.000244	20	7.93e-06	4.73588	-1.14
AABR07062799.2	0.000665	17.7	2.65e-05	1.02071	-2.09
Ak4	1.02e-06	32.2	1.42e-08	3.02314	-2.05
Pygo1	0.0329	8.8	0.00301	1.3691	-1.23
Dgkd	0.0255	9.37	0.00221	5.57189	-1
Sgcd	0.000275	19.7	9.04e-06	3.13705	-1.2
Cmya5	1.89e-09	46	1.18e-11	8.40297	-1.18
Kif21a	0.0255	9.37	0.0022	3.08474	-1.26
Pm20d2	0.000754	17.4	3.1e-05	1.26161	-2.11
Klhl24	0.0106	11.4	0.000748	5.8804	-1.05
Abi3bp	0.0032	14.1	0.000174	3.77505	-1.15
Syde2	0.0219	9.74	0.00181	3.15786	-1.13
Cyb5r2	0.00938	11.6	0.000644	2.29923	-1.19
C7	0.00432	13.4	0.000251	8.32517	-1.1
Gpam	1.54e-05	26.1	3.18e-07	4.72367	-1.66
Lmod3	4.11e-06	29.1	6.93e-08	4.92084	-1.1
Ryr2	0.000754	17.4	3.1e-05	9.45716	-1.58
Trim50	7.4e-07	32.9	9.84e-09	5.12163	-1.17
Nr3c2	5.29e-05	23.3	1.36e-06	2.58141	-2.08
Gbp1	0.00211	15	0.000105	4.95325	-1.01
Mkx	0.0149	10.6	0.00114	0.463264	-1.52
Angpt1	9.63e-07	32.3	1.33e-08	4.04564	-1.97
Mgrn1	0.00483	13.2	0.000286	6.58195	-1.07
Acmsd	0.00156	15.7	7.25e-05	0.0407618	-1.71
Fbxo21	0.00362	13.8	0.000202	3.38114	-1.1
Ctnna3	0.00833	11.9	0.000559	2.8501	-1.23
RGD1310507	0.000249	19.9	8.13e-06	4.17931	-1.06
Rab12	4.99e-05	23.5	1.26e-06	5.67723	-1.08
Fam126a	0.012	11.1	0.00087	4.57854	-1.23
Rasd2	1.26e-10	51.7	6.41e-13	3.80799	-2.01
Fhod3	8.93e-06	27.3	1.71e-07	7.38884	-1.01
Papln	0.0285	9.13	0.00252	4.82999	-1.26
Ube3b	0.0312	8.92	0.00282	4.44852	-1.09
Kcnj12	0.000147	21.1	4.43e-06	3.43589	-1.18
Slc25a30	0.0123	11	0.000896	3.98625	-1.05
Plin4	0.000374	19	1.32e-05	6.44433	-1.17
Acacb	2.35e-11	55.4	9.95e-14	7.79304	-1.35
Dcbld2	0.0319	8.87	0.0029	5.20809	-1.13
Slc8a1	0.00494	13.1	0.000294	6.01811	-1.42
Akap6	1.47e-08	41.5	1.17e-10	6.38538	-1.66
Trdn	8.87e-08	37.6	8.68e-10	6.87233	-1.11
Art1	7.96e-05	22.5	2.16e-06	0.761849	-2
Atp1a2	1.56e-08	41.4	1.26e-10	7.36043	-1.12
Tead1	0.00266	14.5	0.00014	4.15465	-1.34
Gja3	0.000131	21.3	3.83e-06	3.60558	-1.55
Slc25a13	1.02e-06	32.1	1.43e-08	4.98295	-1.31
Rab3a	0.000128	21.4	3.74e-06	3.27933	-1.24
Tmem25	0.0276	9.2	0.00242	1.5627	-1.05
Txlnb	2.82e-11	55	1.22e-13	7.33881	-1.31
Fsd1l	4.54e-06	28.9	7.76e-08	3.56349	-1.9
Pcdh7	0.00116	16.4	5.11e-05	4.56651	-1.38
Aldh9a1	6.88e-05	22.8	1.82e-06	5.30945	-1.03
AABR07001519.1	0.000233	20.1	7.54e-06	1.2678	-1.72
Klf15	1.68e-05	25.9	3.52e-07	5.16037	-1.02
Col6a6	0.00299	14.2	0.000161	3.77571	-1.63
Hif1an	5.98e-05	23.1	1.56e-06	3.76762	-1.38
AABR07025074.1	0.00176	15.5	8.38e-05	0.813408	-1.75
Aldh6a1	6.21e-12	58.3	2.26e-14	8.44513	-1.18
Pcnx4	0.00214	15	0.000107	3.60678	-1.04
Strip2	0.00177	15.5	8.41e-05	2.0371	-1.63
Slc4a1	4.24e-10	49.2	2.34e-12	3.63654	-1.78
Hlf	0.00335	14	0.000185	-0.452298	-2.01
RGD1307461	0.0145	10.7	0.0011	1.44933	-1.16
Casz1	0.00688	12.3	0.000443	5.01784	-1.22
Myl7	0.00195	15.2	9.46e-05	2.88347	-1.12
Perm1	3e-08	40	2.59e-10	6.67571	-1.12
Pde3a	0.0015	15.8	6.92e-05	5.16318	-1.77
LOC103690033	0.000137	21.2	4.07e-06	0.987752	-2.51
Slc22a3	6.96e-08	38.1	6.68e-10	3.48828	-1.56
Cox15	0.0128	10.9	0.000946	3.84247	-1.23
Ppp1r3a	1.34e-06	31.6	1.94e-08	5.32598	-1.15
Rspo4	0.00427	13.4	0.000248	-0.101399	-1.79
Opcml	0.00562	12.8	0.000344	-0.0310145	-1.88
Armc2	1.37e-08	41.7	1.06e-10	3.59006	-1.64
Atp2b2	1.35e-11	56.6	5.4e-14	3.40183	-2.03
Tnik	0.0021	15.1	0.000104	3.92854	-1.4
Prox1	5.42e-06	28.5	9.55e-08	4.507	-1.43
Ogdh	2.08e-06	30.6	3.17e-08	7.27844	-2.04
Celsr1	5.96e-07	33.4	7.6e-09	3.64017	-2.11
Sorbs1	0.00548	12.9	0.000334	7.27142	-1.78
Scn1a	3.8e-05	24.1	9.18e-07	3.00579	-1.38
Lrrc14b	4.43e-07	34	5.44e-09	5.1368	-1.2
Ghr	3.33e-06	29.6	5.41e-08	6.51123	-1.29
Ppargc1b	0.023	9.62	0.00192	3.94737	-1.34
Ldoc1l	0.00432	13.4	0.000251	1.17734	-2.03
Dner	0.00272	14.4	0.000144	0.736379	-1.65
Nipal3	0.0335	8.76	0.00308	2.73611	-1.29
Mapt	6.07e-05	23	1.59e-06	5.6795	-1.01
Mt-nd4l	0.0275	9.21	0.0024	10.9876	-1.04
Homer1	0.000738	17.4	3.02e-05	3.57801	-1.56
Cpne3	0.0418	8.25	0.00408	4.64338	-1.13
Cd28	0.0369	8.54	0.00348	0.00627375	-1.48
Adcy5	2.59e-08	40.3	2.19e-10	7.04351	-1.27
Cadps	4.68e-05	23.6	1.17e-06	3.06456	-1.86
Acot11	0.00736	12.2	0.000482	3.28228	-1.52
Ppm1e	0.00323	14.1	0.000176	2.19384	-1.66
Chrm2	5.02e-05	23.5	1.27e-06	4.6263	-2.02
Zfp106	9.27e-07	32.4	1.27e-08	7.37001	-1.93
Aox4	0.000944	16.9	4.01e-05	3.16043	-1.57
Dip2c	6.72e-05	22.8	1.77e-06	5.78807	-1.53
Nhlrc1	1.65e-06	31.1	2.45e-08	3.6999	-1.42
Vwa7	0.00185	15.4	8.9e-05	5.72005	-1.15
Zyg11b	0.0104	11.4	0.00073	3.88337	-1.42
Inpp4b	9.33e-05	22.1	2.61e-06	3.99862	-1.47
Lsamp	0.000125	21.4	3.65e-06	2.94246	-1.29
Itgb8	0.00063	17.8	2.49e-05	2.49966	-2.19
Abcb7	0.00147	15.9	6.7e-05	3.83005	-1.15
Epdr1	1.16e-06	31.9	1.64e-08	5.38173	-1.06
Epm2a	6.36e-06	28.1	1.14e-07	2.14521	-2.13
Nt5dc3	0.0123	11	0.000894	2.41044	-1.1
Fbxo32	2.38e-07	35.4	2.71e-09	5.17771	-1.85
Ephx2	1.45e-08	41.6	1.13e-10	4.26343	-1.54
Nudt12	4.97e-05	23.5	1.25e-06	3.66176	-1.19
Mcart1	0.00413	13.5	0.000238	1.93546	-1.65
Cux2	4.98e-06	28.7	8.66e-08	3.34567	-1.75
Ppargc1a	0.000961	16.8	4.09e-05	4.13807	-1.06
Gabrb2	6.67e-12	58.1	2.51e-14	0.574095	-3.83
Cyp2e1	5.21e-06	28.6	9.12e-08	3.21667	-1.41
Acsl1	1.07e-12	62.1	3.24e-15	8.82426	-1.19
Kcnip2	7.66e-05	22.5	2.07e-06	3.4935	-1.44
Clstn2	0.00415	13.5	0.000239	1.65251	-1.52
Klhl33	0.00138	16	6.23e-05	1.8455	-1.63
Cmbl	1.75e-07	36.1	1.89e-09	5.99586	-1.14
Gfod1	0.0441	8.13	0.00436	4.05971	-1.43
Enpp2	0.00999	11.5	0.000697	3.56319	-1
Samd12	0.000658	17.7	2.62e-05	2.03225	-1.44
Bcl2l13	0.0047	13.2	0.000277	3.99804	-1.03
Phkb	0.0357	8.61	0.00334	4.53804	-1.06
Nnt	1.83e-11	55.9	7.58e-14	9.85602	-1.08
Ros1	2.47e-07	35.3	2.84e-09	3.16781	-1.73
Adcy9	0.0378	8.48	0.00359	2.88821	-1.26
Ispd	0.00038	18.9	1.35e-05	3.48405	-1.09
Acsl6	3.6e-05	24.2	8.65e-07	3.94268	-1.14
Lars2	0.00913	11.7	0.000622	4.31851	-1
Paqr9	0.0067	12.4	0.000429	2.46758	-1.05
Kcna7	0.0185	10.1	0.00148	1.6977	-1.09
Hs3st5	2.31e-05	25.2	5.11e-07	2.45978	-1.63
Fam81a	1.43e-06	31.4	2.08e-08	1.94186	-1.9
Cecr2	0.0102	11.5	0.000712	3.36206	-1.54
Pnpla8	0.000195	20.4	6.17e-06	5.43646	-1.08
Fam185a	0.00254	14.6	0.000132	2.64717	-1.26
Ccdc141	1.12e-06	32	1.57e-08	6.78972	-1.41
Rimbp2	0.0242	9.5	0.00205	5.25106	-1.34
Tmem65	4.03e-05	24	9.87e-07	4.59375	-1.2
LOC691485	3.49e-10	49.6	1.91e-12	4.29447	-1.71

## Sheet: TMZ+MI vs MI
TMZ+MI vs MI
Symbol	FDR	LR	PValue	logCPM	logFC
Ate1	0.025	18.9	1.39e-05	4.43332	1.38
RGD1308750	0.00685	22.1	2.54e-06	2.6609	1.49
LOC103690033	3.59e-06	38.9	4.43e-10	0.99359	2.52
RT1-CE16	0.0228	19.2	1.2e-05	1.43218	1.92
LOC102554232	1.34e-09	55.7	8.3e-14	0.26453	4.07
Mrpl36	0.0289	18.4	1.78e-05	0.657263	-5.56
LOC100911110	0.0115	21	4.62e-06	5.93328	-1.36
Nhp2	0.000105	31.9	1.62e-08	4.46414	-3.54
Trappc2b	0.0153	20.2	7.1e-06	1.37336	-9.67
Pla2g2a	1.16e-09	57.4	3.57e-14	6.1629	-1.35
Hmgcs2	0.0157	20	7.74e-06	3.58803	-1.17
Trh	0.0333	17.8	2.47e-05	2.43959	-1.29
Nfs1	0.0296	18.3	1.92e-05	3.46174	-3.12
Ms4a6bl	1.51e-09	54.7	1.4e-13	0.891734	-3.23

## Sheet: D0.42+MI vs MI
D0.42+MI vs MI
Symbol	FDR	LR	PValue	logCPM	logFC
Mmp12	1.95e-14	72.5	1.69e-17	4.01688	2.15
Tlr13	7.45e-09	44.3	2.83e-11	5.27349	1.39
Loxl4	0.00257	14.9	0.000116	3.23956	1.76
Rn50_10_0706.2	0.00112	17	3.74e-05	0.172773	1.86
AABR07064111.1	0.00268	14.7	0.000123	1.38543	1.46
Styx	0.00267	14.8	0.000123	3.4089	1.43
Asns	0.00347	14.1	0.000174	2.9324	1.01
Cdyl2	0.0199	9.8	0.00175	1.94319	1.21
Pdpr	2.01e-06	31.8	1.74e-08	4.47608	1.82
Atp7a	0.00119	16.9	4e-05	3.68881	1.79
Ldoc1l	0.0198	9.81	0.00173	0.948178	1.7
Vwa5a	0.00644	12.6	0.000386	1.84864	2.84
Itgb2	2.56e-17	86.7	1.27e-20	6.95051	1.64
Btk	9.53e-07	33.5	7.23e-09	3.36567	1.53
Nom1	5.1e-05	24.4	7.83e-07	4.50724	1.23
Igdcc4	0.0178	10.1	0.00151	3.83274	1.45
Hcls1	4.5e-05	24.7	6.69e-07	5.74075	1.04
Rmnd5a	0.0084	11.9	0.000549	3.97782	1.39
Pus7	0.00125	16.7	4.36e-05	3.70037	1.03
Fmn1	3.22e-06	30.7	3.01e-08	1.58387	2.64
Msmp	0.021	9.66	0.00188	2.88945	1.37
Fgd4	4.36e-09	45.6	1.47e-11	2.43185	2.37
Aff4	0.000102	22.7	1.86e-06	6.19277	1.07
Arg1	1.22e-32	162	3.76e-37	5.18104	2.78
Vav1	8.72e-09	43.9	3.39e-11	4.43359	1.58
Kcna2	7.04e-05	23.6	1.16e-06	2.49076	1.43
Stam2	0.0258	9.16	0.00248	3.97531	1.12
Nceh1	2.23e-05	26.3	2.86e-07	4.98706	1.09
Lrp8	0.000354	19.8	8.66e-06	4.1351	1.32
Lmbrd2	0.00163	16	6.26e-05	2.89619	1.85
Kif15	0.00314	14.3	0.000152	2.50853	1.08
Plac8	7.63e-06	28.8	8.14e-08	4.17223	1.37
Lysmd3	0.00151	16.2	5.66e-05	3.99716	1.17
Extl3	0.00088	17.6	2.7e-05	4.73009	1.49
Clstn2	0.00691	12.4	0.000425	1.60649	1.44
AABR07057250.1	0.0234	9.38	0.00219	0.400086	1.24
Tanc2	0.0402	8.06	0.00453	4.1271	1.51
Xpr1	1.39e-06	32.6	1.14e-08	4.47692	2.27
Usp13	9.67e-08	38.7	5.04e-10	7.52363	1.07
Emsy	0.0178	10.1	0.00151	4.08794	1.27
Rif1	0.00465	13.4	0.000255	4.53242	1.41
Yap1	0.00852	11.9	0.000561	5.56642	1.24
Ptk2b	2.51e-06	31.3	2.24e-08	4.42302	1.39
Adipor2	0.00142	16.4	5.14e-05	4.75059	1.48
Tlr6	5.33e-05	24.3	8.31e-07	2.53163	1.56
Il11	3.06e-05	25.6	4.14e-07	2.11569	1.58
Apbb1ip	1.61e-05	27.1	1.94e-07	4.2263	1.24
Ptp4a1	0.0366	8.28	0.004	-0.169191	1.17
Kcnab2	3.74e-05	25.1	5.33e-07	2.3289	1.87
Ogdh	1.71e-05	27	2.07e-07	7.16745	1.9
Ptgfr	1.75e-13	67.7	1.89e-16	7.12081	1.76
Samsn1	9e-10	49.2	2.36e-12	3.82015	1.8
Dis3	0.00117	16.9	3.95e-05	4.03395	1.22
Nin	0.0155	10.4	0.00125	2.54056	1.12
Cd8b	0.00223	15.2	9.49e-05	1.60469	1.27
Kif5b	4.07e-06	30.2	3.95e-08	7.54393	1.41
Itgad	2.8e-16	81.6	1.64e-19	6.25579	1.97
Usp2	0.000522	18.9	1.38e-05	4.66583	1.31
Tmem131	0.00458	13.4	0.000251	5.57023	1.11
Mcph1	0.0204	9.74	0.00181	1.81122	1.19
LOC497796	0.00472	13.3	0.00026	0.525599	1.54
Map9	0.00947	11.6	0.000647	2.31129	1.05
Dnal1	0.00604	12.7	0.000356	2.8261	1.26
Ghrl	0.0211	9.65	0.00189	1.0681	1.32
Cd33	1.84e-07	37.2	1.06e-09	3.37599	1.57
Pik3r1	7.27e-05	23.6	1.21e-06	5.86007	1.06
Lilrc2	1.24e-06	32.9	9.87e-09	1.76441	2.08
Abhd2	1.17e-06	33	9.19e-09	4.92981	1.38
Tsn	0.000355	19.8	8.73e-06	4.34722	1.29
Clec4a1	6.4e-05	23.8	1.05e-06	4.84573	1.06
Cdc27	1.54e-06	32.4	1.29e-08	4.74098	1.46
Rabif	0.00773	12.1	0.000491	1.65284	3.73
Clec4a2	2.63e-07	36.4	1.63e-09	3.13686	1.6
Gba	0.00248	14.9	0.000111	4.21607	1
Itgav	0.000732	18.1	2.12e-05	5.44438	1.7
LOC681325	2.05e-08	42	8.97e-11	2.72417	1.95
Ears2	0.0151	10.5	0.00121	2.34026	1.09
Aak1	0.00166	16	6.41e-05	4.4992	1.61
Usp32	2.66e-06	31.2	2.39e-08	5.60353	1.26
Plekhm3	0.00645	12.6	0.000388	2.2661	2.17
Rnasel	5.27e-10	50.4	1.28e-12	4.29455	1.69
Csnk2a1	3.38e-05	25.4	4.64e-07	5.99193	1.38
Epg5	0.0412	7.99	0.00471	4.56978	1.29
Tulp4	0.00907	11.8	0.000608	4.54552	1.63
Ttbk2	0.0409	8.01	0.00466	3.17872	1.14
Xrn1	0.00284	14.6	0.000134	4.33559	1.22
Prok2	2.3e-05	26.2	3e-07	-0.707322	2.84
Pag1	0.0313	8.67	0.00323	1.4965	1.31
Tbxas1	4.86e-07	34.9	3.43e-09	3.93255	1.43
Kif21b	2.82e-05	25.8	3.76e-07	3.57555	1.91
Znrf2	1.5e-05	27.3	1.76e-07	5.76818	1.03
RGD1307830	0.0188	9.94	0.00162	2.89289	1.26
Vwa8	5.46e-06	29.5	5.54e-08	1.46758	2.09
Csf3r	6.25e-21	104	1.74e-24	5.45428	2.31
Il36b	0.00137	16.5	4.94e-05	-0.0592474	1.75
AABR07025074.1	0.0258	9.16	0.00248	0.534411	1.32
Sgpl1	1.32e-07	37.9	7.31e-10	6.13321	1.17
Rrm2b	0.00542	13	0.000309	2.66125	1.55
Mtr	0.0091	11.7	0.000612	4.11479	1.25
Rsl1	0.0475	7.64	0.00572	1.8976	1.21
Sgms2	1.32e-07	37.9	7.29e-10	2.64295	1.99
Esyt2	0.0301	8.77	0.00307	4.91774	1.22
Traf3	0.00119	16.9	4.05e-05	4.64443	1.27
43525	0.000826	17.8	2.47e-05	0.797467	1.94
Sptb	0.000358	19.7	8.85e-06	5.81091	2.15
Rn50_1_1361.1	0.00969	11.6	0.000666	2.26578	1.28
Rbl1	8.23e-06	28.6	8.89e-08	2.65455	1.77
Cx3cr1	9.11e-09	43.8	3.57e-11	3.07653	2.08
Atp8b4	2.78e-07	36.2	1.74e-09	3.68627	1.84
Fam126a	0.00012	22.3	2.3e-06	4.9511	1.74
Trim36	0.00754	12.2	0.000474	0.994936	1.49
Vprbp	0.00353	14.1	0.000178	5.08281	1.12
Twistnb	0.0022	15.3	9.34e-05	4.11668	1.01
Slc30a1	0.000151	21.8	3.05e-06	5.36634	1.24
Eps15	0.000616	18.5	1.69e-05	5.43576	1.07
Foxo3	0.029	8.85	0.00293	4.38328	1.46
Btbd7	0.0479	7.61	0.00579	4.65366	1.27
Uhrf1bp1	0.0105	11.4	0.000744	4.18413	1.54
Vcpip1	0.00148	16.3	5.47e-05	4.42296	1.39
Nbeal1	0.0391	8.13	0.00436	3.73443	1.17
Socs4	0.00355	14	0.000179	3.23799	1.46
Tmem154	0.00272	14.7	0.000125	2.11113	1.7
Rab14	5.12e-05	24.4	7.88e-07	5.26191	1.12
Slc16a3	2.25e-07	36.7	1.35e-09	6.00641	1.18
Mapk8	0.00907	11.7	0.000609	3.63954	1.15
Bmpr1a	6.34e-05	23.9	1.03e-06	4.92921	1.4
Uggt1	8.4e-05	23.2	1.46e-06	6.63948	1.05
P2ry13	0.0366	8.29	0.004	0.681511	1.38
Pcdh7	7.46e-05	23.5	1.27e-06	4.76797	1.65
Prr5l	0.00267	14.8	0.000122	2.86374	1.09
Hilpda	0.000889	17.6	2.75e-05	3.11228	1.08
Nfe2	0.000785	17.9	2.32e-05	2.45288	1.23
Ccl2	4.29e-09	45.7	1.39e-11	7.06576	1.21
Tarm1	3.61e-06	30.5	3.42e-08	0.272562	2.58
LOC497963	2.13e-07	36.9	1.26e-09	1.7969	2.89
Tbccd1	0.00969	11.6	0.000667	3.39455	1
Fcgr2a	0.000158	21.7	3.23e-06	4.43617	1.12
Ubxn2a	4.62e-05	24.6	6.89e-07	3.98762	1.4
Slc35e1	0.0032	14.3	0.000156	3.66033	1.45
Prdm6	0.0447	7.79	0.00526	0.549601	1.06
Acaca	0.0198	9.82	0.00173	4.32019	1.44
Palm2	0.000665	18.3	1.85e-05	2.65854	2.08
Ep300	0.00863	11.9	0.000571	3.89921	1.8
Mthfd1l	8.21e-06	28.6	8.81e-08	4.51151	1.19
Camta1	0.0287	8.88	0.00289	4.8889	1.61
Prrc2b	0.028	8.94	0.00278	6.89009	1.52
Pard3b	0.00125	16.7	4.35e-05	3.31364	1.78
Zbtb25	0.0419	7.95	0.00482	2.18292	1.32
Bcl2	0.000174	21.5	3.63e-06	2.43344	1.73
Crk	0.00456	13.4	0.000249	6.00647	1.22
Ccdc141	2.02e-05	26.6	2.55e-07	6.70459	1.29
Mgrn1	0.00135	16.5	4.83e-05	6.67353	1.2
Ncoa2	0.0196	9.84	0.0017	4.42702	1.79
Acot11	0.0163	10.3	0.00134	3.20903	1.41
Mpp5	0.000883	17.6	2.72e-05	4.54447	1.06
Zdhhc21	3.69e-05	25.2	5.22e-07	3.41599	2.08
Nufip2	0.00182	15.7	7.25e-05	4.6637	1.8
Lilra5	0.00845	11.9	0.000554	1.80984	1.28
Bag4	0.03	8.77	0.00306	2.1222	1.42
Il1b	1.43e-06	32.5	1.19e-08	3.89254	1.43
Hlcs	0.000258	20.5	5.82e-06	2.75744	1.88
Clec12a	7.35e-05	23.5	1.24e-06	3.47403	1.24
Ids	0.00575	12.9	0.000334	4.65453	1.59
Epsti1	9.08e-05	23	1.61e-06	3.13062	1.28
Pi4k2a	0.00153	16.2	5.72e-05	4.36112	1.29
Zbed4	0.000835	17.8	2.5e-05	4.19867	1.07
Shoc2	0.0042	13.6	0.000223	4.68095	1.03
Coro7	0.0368	8.27	0.00402	0.269828	1.34
Evi2b	1.45e-05	27.3	1.7e-07	3.58767	1.32
Rab3gap2	0.000957	17.4	3.05e-05	5.29747	1.08
Mettl2b	0.0023	15.1	9.93e-05	3.40189	1.31
Slamf6	0.00818	12	0.00053	1.24907	1.57
Rxra	0.00454	13.4	0.000246	5.10243	1.26
Scn4b	3.71e-05	25.2	5.27e-07	5.17772	1.06
Cep135	0.0116	11.1	0.000852	2.89115	1.01
LOC102554315	0.00782	12.1	0.000499	1.45457	1.55
Napepld	0.00068	18.3	1.91e-05	3.18113	1.36
Tns1	0.0207	9.7	0.00185	8.51491	1.54
Rspry1	0.0033	14.2	0.000162	3.62475	1.06
Tmtc1	0.037	8.26	0.00405	3.78395	1.23
C2cd3	0.00388	13.8	0.000202	3.80317	1.17
Chd1	0.00146	16.3	5.35e-05	5.39964	1.2
Tab3	0.0423	7.93	0.00487	1.23684	1.52
Plxna1	0.00124	16.7	4.28e-05	5.91052	1.13
Akap7	0.028	8.94	0.00279	2.47649	1.08
LOC100910483	0.000127	22.2	2.48e-06	0.0601971	2.37
Dzip3	0.0259	9.15	0.00249	3.31175	1.28
H6pd	0.00409	13.7	0.000216	4.86489	1.16
Mx1	1.49e-12	62.9	2.17e-15	4.97502	1.73
Rasgrp1	0.0315	8.66	0.00326	1.5178	1.28
Dnajc5	0.000468	19.2	1.21e-05	4.89693	1.18
Setx	0.0324	8.58	0.00339	5.45624	1.04
Kcnj2	0.00216	15.3	9.16e-05	3.88184	1.73
S100a9	3.84e-06	30.3	3.67e-08	6.09889	1.03
Angpt1	6.99e-09	44.5	2.58e-11	4.34181	2.33
Fcgr1a	2.25e-08	41.8	1.02e-10	5.74965	1.25
Rab5a	0.0017	15.9	6.63e-05	4.84653	1.01
Slc4a7	0.000394	19.5	9.86e-06	4.20298	2.03
Rc3h2	0.00228	15.2	9.8e-05	4.48587	1.18
Itsn1	0.000235	20.8	5.19e-06	5.56711	1.5
Serpinb8	2.91e-11	56.6	5.39e-14	2.87553	2.1
Tas2r120	0.0373	8.24	0.00409	0.0769587	1.14
Plcg2	0.000141	21.9	2.82e-06	4.03457	1.17
Slc30a7	0.00268	14.7	0.000123	3.49196	1.03
Mbp	0.00194	15.6	7.87e-05	2.16803	1.5
Ankdd1a	0.0107	11.3	0.000762	1.76014	1.13
LOC24906	0.0012	16.8	4.07e-05	3.6609	1.01
Zfp37	0.0121	11	0.000905	0.532221	1.43
Cd53	1.1e-15	78.6	7.44e-19	5.94454	1.78
Klra2	0.00257	14.9	0.000116	2.42722	1.09
Rasal2	0.0144	10.6	0.00113	4.81177	1.35
Cd84	4.9e-09	45.3	1.68e-11	2.5786	2.45
Mxd1	1.27e-05	27.6	1.46e-07	5.09568	1.37
Trip11	0.00336	14.2	0.000165	5.59032	1.23
Stxbp2	2.95e-07	36.1	1.91e-09	3.93809	1.45
Tbc1d4	0.00365	14	0.000186	5.15032	1.24
Dnajc16	0.00017	21.5	3.52e-06	3.8018	1.77
Tmem104	0.000789	17.9	2.34e-05	3.4635	1.62
Tln2	0.00909	11.7	0.00061	5.62465	1.39
Ccdc186	0.0033	14.2	0.000162	4.61457	1.26
Rapgef6	0.0259	9.14	0.0025	4.12224	1.34
Celf1	8.69e-05	23.1	1.52e-06	5.60693	1.47
Ogfod1	1.6e-06	32.3	1.35e-08	2.92651	1.87
Atxn1l	0.0218	9.56	0.00198	3.83556	1.46
Kctd20	0.0352	8.38	0.00379	4.17644	1.15
Clec16a	0.0173	10.1	0.00145	4.51216	1.23
RGD1561778	2.27e-17	87.1	1.05e-20	5.29886	1.95
Cass4	0.000245	20.7	5.49e-06	2.63969	1.33
Zmpste24	0.000165	21.6	3.37e-06	4.79411	1.19
Ccdc6	0.00928	11.7	0.000628	3.3578	1.53
Tsc1	0.0128	10.9	0.000971	4.06546	1.53
Suz12	0.000231	20.8	5.08e-06	4.46366	1.31
Me2	2.84e-05	25.8	3.79e-07	5.06751	1.02
LOC100360330	0.0115	11.1	0.000844	1.94901	1.74
Soat1	5.29e-10	50.3	1.31e-12	4.96551	1.87
Slc39a8	2.8e-05	25.8	3.72e-07	4.56522	1.11
Fgd6	0.0369	8.27	0.00403	4.55347	1.16
Lilrb3	1.01e-11	58.8	1.71e-14	4.41164	1.89
Pnpla8	6.1e-06	29.3	6.23e-08	5.60128	1.32
Kpna3	9.3e-06	28.3	1.02e-07	5.08904	1.51
Ncapg	0.00024	20.7	5.33e-06	2.44628	1.7
Rlim	0.0401	8.07	0.00451	1.14847	2.52
Rab42	0.00477	13.3	0.000263	-0.0303544	1.7
Tlcd2	0.0426	7.91	0.00493	0.93186	1
Tm4sf19	0.000698	18.2	1.99e-05	2.22598	1.27
Kif11	0.00102	17.2	3.29e-05	3.35258	1.17
43719	0.000748	18	2.19e-05	6.7235	1.14
Prrx1	0.000306	20.1	7.22e-06	3.08733	1.51
Ssh2	0.000871	17.7	2.65e-05	5.57519	1.62
Igf2r	5.78e-05	24.1	9.13e-07	8.14207	1.08
LOC100911769	0.00076	18	2.23e-05	1.51915	2.19
Rassf2	0.00221	15.3	9.39e-05	3.8651	1.2
Vav3	0.00113	17	3.76e-05	3.67482	1.16
Mcm4	4.99e-05	24.5	7.59e-07	5.20884	1
Slc23a2	4.59e-06	29.9	4.57e-08	5.41225	1.42
Gas7	0.000532	18.9	1.41e-05	5.03196	1.09
Itgb3	0.0034	14.2	0.000168	3.46385	1.42
Il13ra1	0.00249	14.9	0.000111	4.0349	1.78
Tyms	0.00279	14.6	0.00013	3.35403	1.04
Zak	0.000563	18.7	1.51e-05	5.51483	2.36
Slfn4	3.7e-24	121	3.42e-28	8.60995	1.87
Mapk1	6.49e-06	29.1	6.77e-08	5.77204	1.2
Ahi1	0.013	10.8	0.000998	3.36898	1.19
Pdpk1	0.000296	20.2	6.92e-06	4.03923	1.7
AABR07012826.1	0.00114	17	3.82e-05	-0.201117	1.93
Notch2	0.000267	20.5	6.09e-06	5.37404	2
RGD1307182	3.23e-14	71.3	2.99e-17	2.68075	2.85
AABR07021704.1	0.0245	9.28	0.00232	2.37707	1.15
Mtpn	3.22e-05	25.5	4.38e-07	5.98726	1.31
Pla2g2d	3.05e-06	30.8	2.82e-08	4.48263	1.28
Mis12	0.0186	9.98	0.00159	3.25363	1.12
Myo1g	9.77e-06	28.2	1.08e-07	5.38116	1.04
Nucks1	1.61e-06	32.2	1.36e-08	5.47611	1.18
Ints2	0.024	9.32	0.00226	3.35472	1.17
Clasp1	0.00273	14.7	0.000126	5.16355	1.72
Alpk2	9.38e-09	43.8	3.71e-11	6.5429	1.6
Cds2	0.00376	13.9	0.000193	4.62017	1.49
Ndrg1	6.72e-07	34.2	4.85e-09	6.67633	1.02
Abcc4	0.025	9.23	0.00239	3.93786	1.14
Gprin3	2.12e-07	36.9	1.24e-09	2.53438	2.2
Adam12	0.0011	17.1	3.62e-05	4.48404	2.33
Atg7	0.00315	14.3	0.000152	4.0214	1.04
Qk	0.00191	15.6	7.72e-05	4.05395	1.72
Ap2b1	7.77e-05	23.4	1.32e-06	5.0197	1.23
Cd200r1	2.68e-05	25.9	3.52e-07	3.69573	1.24
Otud4	0.0043	13.6	0.000231	5.29334	1.47
Krt75	0.000708	18.2	2.03e-05	1.90044	1.38
Pde3a	0.000958	17.4	3.06e-05	5.23978	1.87
Polr2a	0.00173	15.9	6.78e-05	6.28151	1.07
Iqsec1	0.000148	21.8	2.98e-06	6.2933	1.12
Wdfy1	0.027	9.03	0.00265	3.76345	1.14
LOC100912849	0.000357	19.8	8.81e-06	-0.518821	2.33
Hsh2d	0.0111	11.3	0.000796	2.29895	1.05
Zfp770	4.4e-05	24.8	6.44e-07	2.46398	1.71
Smpdl3a	5.3e-13	65.3	6.38e-16	5.89718	1.54
Tuft1	0.0118	11.1	0.000873	1.24532	1.17
Smyd1	2.67e-12	61.6	4.11e-15	7.00826	1.62
Nilr1	1.13e-07	38.3	6e-10	3.35702	1.66
Akna	0.000847	17.7	2.56e-05	4.83073	1.1
Zwilch	0.00397	13.8	0.000209	3.04771	1.34
Btbd9	0.0004	19.5	1e-05	2.96894	1.39
Smchd1	0.00115	16.9	3.87e-05	5.25803	1.14
Klhl18	0.0206	9.7	0.00184	3.5969	1.19
Cebpa	2.74e-06	31.1	2.49e-08	5.46746	1.09
Galc	0.0011	17.1	3.62e-05	2.43458	1.33
Stk10	0.00794	12.1	0.000509	4.9518	1.39
Slc25a37	0.00291	14.5	0.000138	3.39888	1.13
Lmtk2	0.000239	20.7	5.31e-06	5.122	1.14
Lig3	0.000511	18.9	1.34e-05	5.16648	1.06
Igf2bp3	0.00173	15.9	6.79e-05	0.535414	1.85
Tbc1d9	9.91e-05	22.8	1.8e-06	4.83875	1.2
AABR07058884.3	0.000692	18.2	1.97e-05	2.88477	1.84
Apc	0.0126	10.9	0.000954	5.53935	1.18
Tmem64	0.00126	16.7	4.41e-05	3.42667	1.08
Dcbld2	0.000683	18.3	1.92e-05	5.56908	1.63
Smox	2.13e-05	26.4	2.7e-07	5.12663	1.1
Tlr7	3.38e-09	46.2	1.04e-11	4.06584	1.7
Fndc3a	0.0177	10.1	0.00149	4.41095	1.21
Mertk	7.23e-05	23.6	1.2e-06	4.35195	1.23
Man2a2	0.0113	11.2	0.000815	5.49717	1.09
AABR07005633.1	0.0327	8.56	0.00343	1.06004	1.11
Olr1	7.06e-08	39.3	3.6e-10	4.20569	1.56
Lbh	2.58e-10	51.9	5.9e-13	6.77314	1.79
Rnf213	0.0132	10.8	0.00102	6.88762	1.44
Thoc2	0.0409	8.01	0.00465	4.85854	1.44
Cacnb2	0.00122	16.8	4.19e-05	4.93764	1.32
Huwe1	0.015	10.5	0.0012	7.2183	1.46
Slc9a7	0.000698	18.2	2e-05	0.922502	1.86
Mnda	2.72e-09	46.8	7.96e-12	5.72368	1.34
Mfhas1	0.00987	11.5	0.000682	4.01589	1.26
Car13	0.0151	10.5	0.00121	0.544929	1.4
Zfp292	0.00496	13.2	0.000276	4.97402	1.03
Plau	0.000104	22.7	1.93e-06	4.81316	1.21
Scimp	5.65e-05	24.2	8.89e-07	3.76874	1.2
Akap13	0.000355	19.8	8.74e-06	7.39022	1.11
Asb7	0.00164	16	6.3e-05	2.55868	1.51
Epb41	0.0124	11	0.000934	5.23391	1.39
Cd80	1.99e-05	26.6	2.51e-07	2.19087	1.86
Cd300le	2.41e-10	52.1	5.36e-13	6.26006	1.43
Hps5	0.000696	18.2	1.98e-05	4.39525	1.01
LOC499229	0.00365	14	0.000186	3.44859	1.82
Cd14	1.58e-05	27.1	1.89e-07	5.65692	1.01
E2f3	0.00224	15.2	9.54e-05	2.49633	1.39
Nckap1l	6.97e-09	44.5	2.54e-11	5.27779	1.35
Ccr1	1.1e-09	48.7	2.98e-12	5.31984	2.03
Spty2d1	0.0455	7.75	0.00538	3.80612	1.12
Egfr	0.000545	18.8	1.45e-05	2.69421	1.62
Tmem156	0.0153	10.4	0.00123	1.11584	1.13
Plek	1.31e-05	27.6	1.51e-07	4.73715	1.2
Madd	0.0131	10.8	0.00101	3.9427	1.06
Mroh2a	0.000733	18.1	2.12e-05	2.14975	1.58
Tbcel	0.00682	12.5	0.000418	2.47628	1.64
Rasal3	0.00146	16.3	5.4e-05	3.584	1.06
AABR07025284.1	0.0312	8.68	0.00322	1.25399	1.18
RGD1561897	0.00581	12.8	0.000338	4.99147	1.36
Itgb7	4.16e-09	45.8	1.32e-11	4.70549	1.44
Samhd1	4.85e-07	34.9	3.41e-09	4.46662	1.63
Nfam1	1.21e-07	38.2	6.51e-10	5.08828	1.27
Adam8	1.13e-13	68.7	1.15e-16	5.23559	1.84
Eif4ebp2	0.000689	18.2	1.96e-05	4.61383	1.53
Otud6b	0.00057	18.7	1.54e-05	4.43712	1.05
Fam210b	0.00289	14.5	0.000137	3.55104	1.13
Iqgap1	0.00453	13.4	0.000246	7.5681	1.07
Tom1l2	0.0255	9.19	0.00244	5.19824	1.38
Sec24a	0.00249	14.9	0.000112	3.65581	1.38
Rbfox2	0.00722	12.3	0.000449	5.05335	1.13
Pygo1	0.00455	13.4	0.000247	1.5239	1.43
Chac1	0.027	9.04	0.00265	0.474092	1.22
Slc37a2	2.24e-05	26.3	2.9e-07	5.33372	1.09
Nipbl	0.00315	14.3	0.000152	6.10781	1.01
Fbxo32	4.46e-07	35.1	3.06e-09	5.18061	1.85
Syt14	0.000754	18	2.21e-05	0.99569	1.82
Rasa3	2.16e-05	26.4	2.74e-07	5.97966	1.08
LOC679894	0.0115	11.1	0.000844	2.74042	1.16
Braf	0.0211	9.65	0.00189	2.68377	1.28
RGD1304929	0.00498	13.2	0.000278	1.30129	1.25
Lsmem1	0.000481	19.1	1.25e-05	3.86001	1.09
Dctn4	0.000761	18	2.24e-05	4.81643	1.31
Cenpe	0.00511	13.1	0.000288	2.92174	1.06
Pde7b	0.0111	11.2	0.000799	2.03472	1.13
Atic	8.59e-06	28.5	9.31e-08	5.25258	1.18
Mgat5	0.0115	11.2	0.000835	2.4851	1.43
Stx17	9.95e-05	22.8	1.81e-06	3.08506	1.38
Tlr5	2.29e-06	31.5	2.02e-08	1.96123	2.35
Gmip	0.00168	15.9	6.51e-05	4.12446	1.04
Sspn	4.79e-09	45.4	1.63e-11	5.91012	1.73
Ppm1e	0.000345	19.9	8.34e-06	2.38617	1.9
Dennd1c	0.00256	14.9	0.000116	2.88818	1.37
Ncor1	0.00346	14.1	0.000173	6.38711	1.02
Zfp871	0.00662	12.5	0.000402	3.25386	1.75
Ikzf1	0.000559	18.7	1.5e-05	3.22033	1.87
Asxl2	0.0126	10.9	0.000946	3.82216	1.65
Rap2a	0.00223	15.2	9.5e-05	4.95954	1.08
Zfp654	0.0431	7.88	0.00499	2.77014	1.07
Nfib	0.0379	8.2	0.00419	4.31002	1.68
Mbnl1	0.00367	14	0.000187	5.28948	1.66
Slamf9	9.46e-08	38.7	4.91e-10	4.05431	1.57
Emb	4.49e-16	80.6	2.77e-19	4.61032	2.02
Ago3	0.00514	13.1	0.00029	2.03861	1.43
Phkb	0.0275	8.98	0.00272	4.5588	1.09
F5	1.49e-12	63	2.11e-15	2.92176	2.42
RGD1305110	0.00775	12.1	0.000493	4.20116	1.1
Rora	0.0438	7.84	0.00512	0.999431	1.26
Dusp16	0.0118	11.1	0.00087	3.6228	1.23
Chst11	0.00733	12.3	0.000458	3.79682	1.1
Phip	0.0209	9.67	0.00188	4.48582	1.55
Serpine1	1.9e-09	47.5	5.41e-12	9.71138	1.13
Car12	8.81e-13	64.2	1.14e-15	1.329	3.39
Zeb2	2.71e-06	31.1	2.44e-08	5.60439	1.98
Rbpj	6.99e-09	44.5	2.59e-11	6.54927	1.65
Gpr65	0.000875	17.6	2.68e-05	2.01602	1.37
Plcb2	0.00119	16.8	4.05e-05	3.18427	1.22
Ubr1	0.0206	9.71	0.00183	4.53379	1.3
Nfic	0.0115	11.2	0.000836	5.72959	1.37
Wnt5a	0.00295	14.5	0.00014	3.519	1.04
Col12a1	4.42e-05	24.8	6.49e-07	6.34185	1.17
Dhx9	0.000659	18.4	1.83e-05	6.26141	1.11
Sesn3	4.45e-05	24.7	6.58e-07	4.28953	1.5
Apba1	0.0214	9.61	0.00193	2.15295	1.57
Nol9	0.00373	13.9	0.000191	4.19853	1.3
Prox1	0.0043	13.6	0.00023	4.22398	1.02
Synpo2l	0.00177	15.8	6.99e-05	6.81204	1.26
Hvcn1	6.18e-05	23.9	9.97e-07	2.83725	1.69
Usp25	9.08e-05	23	1.62e-06	5.58496	1.37
Tlr10	5.7e-05	24.1	8.99e-07	1.95936	1.56
Pcyox1	9.41e-05	22.9	1.69e-06	4.82002	1.47
Mctp2	2.74e-06	31.1	2.49e-08	1.66579	2.07
Ankrd44	0.0175	10.1	0.00147	3.08919	1.46
AC120712.4	0.00949	11.6	0.000649	0.518904	1.82
Mb21d1	0.00368	13.9	0.000188	1.39269	1.49
Top2a	0.000167	21.6	3.43e-06	4.68631	1.02
Gramd1b	0.00547	13	0.000314	3.08646	1.19
Slc8a1	2.07e-05	26.5	2.61e-07	6.48762	2.04
Robo1	0.0029	14.5	0.000137	2.43333	1.53
Aff1	0.00473	13.3	0.000261	5.03014	1.84
Caprin1	3.82e-05	25.1	5.48e-07	7.46237	1.04
Zfp526	0.0268	9.05	0.00262	3.69181	1.07
Trpm7	0.0101	11.5	0.000702	5.63825	1.22
Slco5a1	3.3e-09	46.3	9.99e-12	3.39391	2.77
Lig1	0.0418	7.95	0.0048	2.89289	1.25
Zswim8	0.0302	8.76	0.00308	2.79152	1.29
Ankrd63	0.0149	10.5	0.00119	0.7192	1.22
Rnf169	0.0342	8.46	0.00363	2.14162	1.38
Bdp1	0.00512	13.1	0.000289	4.8332	1.57
Trabd2b	3.08e-05	25.6	4.18e-07	2.74059	1.75
LOC103692716	0.00295	14.5	0.00014	2.39983	1.4
Rel	0.00174	15.9	6.81e-05	2.74329	1.27
Fam73a	0.00866	11.9	0.000574	1.15983	1.32
Angptl4	8.87e-07	33.6	6.65e-09	5.5422	1.12
Psen1	0.0012	16.8	4.08e-05	5.0962	1.23
Il1rl1	3.37e-07	35.7	2.27e-09	2.60443	1.84
Thbs1	4.08e-11	55.8	7.93e-14	8.18882	2.19
Slc2a1	1.14e-08	43.3	4.63e-11	6.32884	1.17
Snx10	9.26e-06	28.4	1.01e-07	3.70622	1.41
Ankrd28	0.003	14.5	0.000143	4.77242	1.47
Acpp	5.18e-09	45.2	1.79e-11	2.14917	2.15
Uhrf1	5.33e-05	24.3	8.31e-07	4.66468	1.06
Ebi3	0.023	9.44	0.00213	1.27261	1.02
Zbtb38	0.00153	16.2	5.74e-05	4.50969	1.58
Prr11	0.00977	11.6	0.000674	0.984955	1.42
Wdr76	0.0475	7.64	0.00572	1.68629	1.04
Ms4a6a	1.57e-09	47.9	4.42e-12	4.81916	1.48
Fam208a	0.0392	8.12	0.00438	4.88737	1.12
Ust	0.00291	14.5	0.000138	2.90105	1.44
Parvg	1.87e-12	62.4	2.83e-15	4.48963	1.94
Cxcr2	3e-18	91.4	1.2e-21	2.63916	3.14
Fancm	0.00161	16.1	6.13e-05	3.51026	1.2
Rsf1	0.0295	8.81	0.00299	4.29835	1.05
Pik3ap1	5.43e-09	45.1	1.91e-11	5.28537	1.57
P2ry2	0.0206	9.71	0.00183	4.5223	1.01
43530	0.00102	17.2	3.31e-05	5.37384	1.39
Myo1f	5.77e-12	60	9.27e-15	6.07069	1.49
F2rl2	0.00155	16.1	5.85e-05	1.97972	1.4
Lcor	0.0298	8.79	0.00303	3.92624	1.66
Hook3	0.00849	11.9	0.000558	3.86698	1.01
Phc3	0.00377	13.9	0.000194	3.74468	1.8
Mecp2	0.00228	15.2	9.82e-05	3.52754	1.14
Zfp236	0.0205	9.73	0.00181	3.98368	1.46
F13a1	1.26e-06	32.8	1.01e-08	6.28809	1.08
Dab2	2.22e-06	31.5	1.95e-08	6.74825	1.9
Dok2	7.41e-06	28.8	7.87e-08	5.76881	1.03
Ankrd17	0.00177	15.8	7.03e-05	6.44798	1
Slc31a1	7.87e-05	23.4	1.35e-06	4.40456	1.11
Bmp2k	0.00059	18.6	1.6e-05	4.50444	1.65
Tm9sf3	5.1e-05	24.4	7.82e-07	6.87706	1.14
Avl9	0.025	9.23	0.00238	2.98139	1.69
Cpeb3	0.0473	7.65	0.00567	2.34215	1.21
Tcf12	0.0188	9.94	0.00162	4.75791	1.19
E2f8	0.013	10.8	0.000997	1.49821	1.08
LOC102549842	0.0271	9.02	0.00267	2.43062	1.06
Smc2	9.41e-05	22.9	1.7e-06	4.99706	1.12
Dpy19l3	0.0166	10.2	0.00137	3.36127	1.02
Med14	0.0049	13.3	0.000272	4.51997	1.32
Oasl	8.82e-07	33.7	6.51e-09	3.81614	1.42
Lman1	4.17e-05	24.9	6.07e-07	5.93342	1.2
LOC100911993	0.00941	11.7	0.000641	4.27983	1.12
Gda	0.00026	20.5	5.91e-06	5.52547	1.63
Mef2d	0.0057	12.9	0.000329	5.99148	1.11
Mbtd1	0.0373	8.24	0.00409	3.02651	1.24
Adap2	0.00257	14.9	0.000116	3.15724	1.33
Sp4	0.00578	12.9	0.000336	2.56306	1.43
M6pr	0.0429	7.89	0.00498	1.37742	1.38
Zfp799	0.0477	7.63	0.00575	1.83521	1.28
Zkscan1	0.00936	11.7	0.000635	2.89782	1.38
Slk	0.00173	15.9	6.79e-05	6.19392	1.48
Sema4a	1.98e-06	31.8	1.7e-08	4.76489	1.26
Zbp1	0.0361	8.33	0.00391	1.44772	1.06
Gsg2	0.00207	15.4	8.69e-05	2.08791	1.3
Primpol	0.00171	15.9	6.67e-05	1.83589	1.36
Cd44	2.98e-11	56.5	5.61e-14	6.8075	1.31
Fam63b	0.0123	11	0.000917	4.32707	1.23
LOC103690111	3.47e-05	25.3	4.85e-07	3.73463	1.22
Pias1	0.00367	14	0.000187	3.8297	1.3
Hk3	1.24e-10	53.4	2.68e-13	5.10485	1.5
Tbl2	0.000173	21.5	3.61e-06	4.6264	1.06
Sgcd	3.82e-07	35.5	2.58e-09	3.41332	1.58
Atp1a3	1.23e-07	38.1	6.67e-10	4.30348	1.53
Cnbd2	0.00387	13.8	0.000201	5.79826	1.12
Rnft1	0.00325	14.3	0.000159	4.34081	1.09
Atp10a	0.00195	15.6	7.97e-05	3.46341	1.17
AABR07013202.1	0.00813	12	0.000526	-0.168193	1.6
Fcgr2b	3.35e-18	91	1.45e-21	5.0282	2.08
Cd68	8.87e-07	33.6	6.62e-09	5.60713	1.13
Hmgxb3	0.0206	9.7	0.00184	4.54757	1.02
Abtb2	0.00846	11.9	0.000555	3.93469	1.26
RGD1565355	3.73e-05	25.1	5.3e-07	2.37009	2.04
Tnrc6b	0.000352	19.8	8.55e-06	6.17197	1.16
Selplg	3.09e-06	30.8	2.87e-08	4.94452	1.28
Hsd17b7	0.00385	13.8	0.0002	2.85037	1
S100a8	1.28e-06	32.8	1.03e-08	5.76658	1.22
Lcp1	1.56e-11	57.9	2.69e-14	7.99395	1.27
AC135409.1	0.00367	14	0.000187	0.615877	1.75
Srxn1	0.00387	13.8	0.000201	2.83046	1.11
Jade3	0.0115	11.2	0.000834	1.23834	1.25
Epm2a	0.00012	22.3	2.31e-06	1.95772	1.87
G3bp2	1.44e-05	27.4	1.68e-07	5.50935	1.39
Serpinb10	0.00286	14.6	0.000135	1.23586	1.52
Man1a2	0.000679	18.3	1.9e-05	5.18634	1.21
Spred1	0.00358	14	0.000181	3.52152	1.47
Usf3	0.0272	9.01	0.00268	3.60096	1.37
Ptprc	1.11e-14	73.7	9.25e-18	6.77269	1.74
Nudcd3	3.39e-05	25.4	4.67e-07	3.66518	1.85
Slc36a1	0.000141	21.9	2.82e-06	3.56534	1.75
Diaph3	0.000683	18.3	1.93e-05	2.05553	1.4
Gca	0.00766	12.2	0.000483	2.64921	1.01
Akap2	0.00142	16.4	5.15e-05	7.42038	1.69
Traf6	0.0244	9.29	0.0023	2.85714	1.23
Ddr2	0.0048	13.3	0.000266	4.85983	1.25
Siglec8	1.29e-05	27.6	1.48e-07	3.21668	1.52
Lpxn	0.00014	22	2.77e-06	3.82645	1.14
Akap12	0.00066	18.4	1.84e-05	6.31889	1.07
Cmtr2	0.000889	17.6	2.75e-05	2.51805	1.37
Jmy	0.0402	8.06	0.00453	2.93934	1.39
Homer1	9.1e-06	28.4	9.88e-08	3.90746	1.98
C2	7.27e-15	74.7	5.61e-18	4.71901	1.89
Tex12	0.00135	16.5	4.85e-05	-0.904777	2.19
Fam206a	0.0375	8.23	0.00412	1.88112	1.05
Mef2a	0.000534	18.8	1.42e-05	6.01339	1.29
Pax8	0.0182	10	0.00155	0.884047	1.69
Tac4	0.0106	11.4	0.000749	-0.0628052	1.58
Sh3bp2	0.000123	22.3	2.38e-06	4.22144	1.1
Sla	8.43e-10	49.3	2.18e-12	4.10787	1.86
Spata2	0.0106	11.4	0.000753	3.39611	1.05
Akap6	4.97e-10	50.5	1.2e-12	6.51334	1.82
Slc43a2	1.77e-07	37.3	1.02e-09	4.83295	1.33
Dennd4c	0.0297	8.8	0.00302	4.7735	1.36
Exoc4	0.000861	17.7	2.61e-05	4.63111	1.45
Clec7a	3.59e-15	76.2	2.55e-18	4.41482	2.15
Zbtb42	0.0174	10.1	0.00146	3.21667	1.08
Ptk7	0.000996	17.3	3.2e-05	4.30836	1.11
Ryr2	0.00148	16.3	5.45e-05	9.43981	1.56
Ppp2r3a	2.78e-07	36.2	1.75e-09	6.38338	1.5
LOC100909879	0.00391	13.8	0.000204	-0.649791	2.05
Frrs1	0.00226	15.2	9.68e-05	3.23448	1.14
Prpf40a	2.18e-05	26.4	2.78e-07	5.82093	1.2
Sox6	0.0318	8.63	0.0033	1.75463	1.03
Ccdc109b	0.006	12.8	0.000353	1.04952	1.48
Dennd1b	3.9e-05	25	5.62e-07	3.13203	2.31
Vps13a	0.0303	8.75	0.0031	4.20108	1.74
Dennd4a	0.000103	22.7	1.89e-06	4.83314	1.23
Heatr5a	0.000449	19.2	1.15e-05	5.19398	1.03
Ate1	0.00442	13.5	0.000238	4.55215	1.53
Lrrc58	0.0347	8.42	0.00372	4.87358	1.65
Ccl7	2.42e-07	36.6	1.49e-09	6.26191	1.18
Klhdc4	0.0178	10.1	0.00151	1.628	1.18
Bhlhe41	1.39e-06	32.6	1.15e-08	3.84042	1.6
Dock4	0.00662	12.5	0.000402	4.23668	1.53
Hectd1	0.000507	19	1.33e-05	7.09773	1.15
Casd1	0.00277	14.7	0.000129	3.72901	1.14
B3galt6	0.0106	11.4	0.000753	2.44846	1.09
Il1r2	1.57e-12	62.8	2.33e-15	3.63877	2.15
LOC102552663	0.0206	9.71	0.00183	-0.106163	1.28
Ak4	6.21e-10	50	1.56e-12	3.44256	2.54
Tbc1d22a	0.0143	10.6	0.00112	3.14512	1.12
Hif1an	7e-12	59.6	1.14e-14	4.36901	2.16
Usp22	0.0232	9.42	0.00215	4.48599	1.18
Ccnt1	0.0351	8.39	0.00376	0.570869	1.53
Bcl2l13	1.06e-06	33.2	8.18e-09	4.43482	1.64
Atf2	0.0294	8.82	0.00298	3.60996	1.11
Map3k9	0.000214	21	4.64e-06	2.02296	2.07
Lyst	0.00564	12.9	0.000326	4.65594	1.86
Fst	0.00782	12.1	0.000499	2.38914	1.01
Ddx3	0.000899	17.5	2.81e-05	5.93857	1.13
Cdk5r1	5.85e-05	24.1	9.3e-07	-0.115018	2.33
Pdxdc1	0.000683	18.3	1.93e-05	4.07205	1.28
Tagap	0.00478	13.3	0.000264	2.64551	1.07
Lrp6	0.0133	10.8	0.00102	5.27891	1.36
Hlf	0.00544	13	0.000311	-0.528708	1.85
AABR07028349.1	0.00377	13.9	0.000194	2.91597	1.11
Elmo1	0.0412	7.99	0.0047	3.99448	1.08
Pik3r5	4.84e-07	34.9	3.39e-09	4.30704	1.46
Il1rn	6.21e-10	49.9	1.59e-12	6.30519	1.31
Tbc1d5	0.0216	9.59	0.00195	4.30381	1.07
Akap11	0.000566	18.7	1.52e-05	5.63756	1
Nipa1	0.0123	11	0.000917	2.79223	1.07
Galnt1	0.000268	20.5	6.11e-06	5.95856	1.08
Jchain	0.00561	12.9	0.000323	0.382413	1.41
Zfp518b	0.0363	8.31	0.00395	2.16737	1.43
Yod1	0.0209	9.67	0.00188	1.85644	1.3
Maf	7.29e-05	23.6	1.22e-06	5.42457	1.47
Ubr3	6.28e-05	23.9	1.02e-06	6.32868	1.61
Zfp238	0.00342	14.1	0.00017	4.3951	1.29
Zfp148	0.00201	15.5	8.29e-05	4.63204	1.18
Nr3c2	2.28e-05	26.3	2.96e-07	2.64777	2.15
Zfyve26	0.0129	10.9	0.000986	4.44364	1.03
Strip2	0.00012	22.3	2.3e-06	2.25373	1.9
Asap1	0.00861	11.9	0.000567	4.9667	1.08
Usp31	0.00965	11.6	0.000662	3.93555	1.41
Pde3b	3.11e-05	25.6	4.22e-07	3.53115	1.33
Rasgef1b	0.0061	12.7	0.00036	2.00769	1.36
Lrba	0.000301	20.2	7.05e-06	5.34551	1.24
Gsg1	7.46e-05	23.5	1.27e-06	0.643477	1.83
Bmt2	0.000628	18.5	1.72e-05	3.22345	1.62
Chm	0.000322	20	7.66e-06	3.49089	1.55
Smarcc1	0.000101	22.7	1.85e-06	5.73132	1.16
Fign	0.0118	11.1	0.000869	2.03254	1.56
Sell	3.29e-22	111	6.09e-26	3.88014	2.81
Parp4	0.000103	22.7	1.9e-06	5.91868	1.05
Kansl1	0.0287	8.88	0.00288	4.64255	1.1
Cck	0.00832	12	0.000542	0.607753	1.34
Med1	0.0084	11.9	0.00055	5.28661	1.56
Qtrt2	0.0281	8.93	0.0028	1.39195	1.19
Myo1e	0.0403	8.05	0.00454	4.92879	1.01
Ogn	0.0447	7.79	0.00527	-0.419153	1.48
Dlg1	0.00132	16.6	4.69e-05	5.49686	1.11
Inhba	0.000301	20.2	7.07e-06	3.83272	2.24
Osmr	0.00545	13	0.000312	5.56964	1.3
AABR07065498.1	0.00242	15	0.000107	2.91058	1.35
Zhx2	0.0188	9.95	0.00161	3.51251	1.03
Ttl	0.00302	14.4	0.000145	4.30384	1.3
Scamp5	0.0159	10.4	0.00129	2.65085	1.03
RGD1304884	0.00727	12.3	0.000453	5.50321	1.27
Sntb1	5.34e-05	24.3	8.34e-07	4.29483	1.81
Kcnj3	6.53e-06	29.1	6.84e-08	3.01475	1.82
Itgax	0.000103	22.7	1.91e-06	5.34635	1.05
Atg4c	5.07e-05	24.4	7.75e-07	3.06759	1.4
Ranbp6	0.0197	9.83	0.00172	3.523	1.05
Phf20	0.0129	10.9	0.000979	4.20969	1.39
Nf1	0.0359	8.34	0.00388	4.87421	1.24
Ddx58	0.0127	10.9	0.000966	3.23115	1.23
AABR07003537.1	0.000936	17.4	2.96e-05	1.41818	1.43
Ccr2	0.00014	22	2.79e-06	1.81535	2.28
Rcor1	0.0247	9.26	0.00235	2.7692	1.53
Ticam2	6.94e-06	29	7.32e-08	2.3885	1.67
Tpd52	2.82e-05	25.8	3.76e-07	5.10833	1.02
Whsc1	0.00103	17.2	3.35e-05	5.17336	1.03
Cpd	0.000548	18.8	1.46e-05	6.81881	1.33
Kmo	0.0114	11.2	0.000831	1.05464	1.25
Abl2	0.0111	11.2	0.000796	3.62272	1.73
AABR07062183.1	1.07e-05	28	1.2e-07	2.23637	1.72
Kbtbd11	0.0179	10.1	0.00151	1.75902	1.44
Taok1	0.000423	19.4	1.07e-05	5.32041	1.71
RGD1561897	0.0113	11.2	0.000822	1.23316	1.61
Limch1	0.00061	18.5	1.66e-05	5.38268	1.46
Senp2	0.00988	11.5	0.000684	3.74823	1.14
Uevld	0.00295	14.5	0.00014	2.15006	1.57
Mdn1	0.000419	19.4	1.06e-05	5.60327	1.47
Myo5a	5.33e-05	24.3	8.3e-07	5.08821	1.93
Gpr39	0.0396	8.1	0.00443	1.01722	1.07
Exo1	0.026	9.13	0.00251	1.6874	1.02
Spib	0.00396	13.8	0.000208	1.49337	1.32
Gpc6	0.0332	8.52	0.0035	3.09932	1.2
Dnajc28	0.0011	17	3.66e-05	2.75803	1.19
Ube3b	0.00345	14.1	0.000172	4.64486	1.37
Mtfr1	2.16e-06	31.6	1.88e-08	3.16248	1.52
Slc25a43	0.000531	18.9	1.41e-05	1.32209	1.49
Osbpl8	3.97e-06	30.2	3.83e-08	5.60839	1.92
Dnm1l	7.81e-05	23.4	1.34e-06	5.83094	1.46
Agfg1	0.000242	20.7	5.42e-06	6.11406	1.11
Zfp617	0.00548	13	0.000315	1.73468	1.37
Mcm8	0.0167	10.2	0.00138	1.61574	1.03
Cd300lb	1.91e-09	47.5	5.49e-12	3.23177	2.07
Acap2	0.00301	14.5	0.000144	5.22715	1.37
Mrc1	3.18e-09	46.4	9.52e-12	6.33851	1.25
LOC308990	0.0096	11.6	0.000658	3.10475	1.01
Igsf7	1.57e-08	42.6	6.59e-11	2.64817	1.91
Nlrp1a	0.000344	19.9	8.3e-06	4.17747	1.31
Gpnmb	1.04e-31	157	6.4e-36	9.09319	2.09
Rprd2	0.0127	10.9	0.000966	4.51803	1.16
Arl11	7.35e-07	34.1	5.36e-09	4.67218	1.32
Bend3	0.0302	8.76	0.00308	1.93167	1.45
Runx2	0.000883	17.6	2.72e-05	3.05798	1.21
Utp6	0.00118	16.9	4e-05	4.47588	1.2
Esrrb	0.000389	19.6	9.71e-06	2.24782	1.62
Trib3	0.00258	14.8	0.000117	2.20951	1.17
Adgb	6.08e-06	29.3	6.19e-08	1.25721	1.96
Zfp609	0.0135	10.7	0.00104	5.15573	1
Stap1	0.0042	13.6	0.000223	1.80799	1.17
Col8a1	0.000864	17.7	2.63e-05	6.56531	1.01
Gatsl2	0.0277	8.97	0.00275	1.2211	1.78
Slc7a2	0.00498	13.2	0.000278	2.54996	1.84
Slpi	3.26e-17	86.1	1.71e-20	6.86854	1.9
Creb1	0.00771	12.2	0.000489	3.78086	1.25
Bid	0.000891	17.6	2.77e-05	4.04233	1.01
Slc41a2	7.91e-05	23.3	1.36e-06	4.0856	1.16
Ccl24	4.45e-05	24.7	6.58e-07	4.04742	1.21
B4galt5	9.19e-06	28.4	1e-07	6.15826	1.1
Brwd3	0.0158	10.4	0.00128	3.05317	1.62
Sh2b2	0.00279	14.6	0.00013	3.36841	1.01
Snx22	0.0256	9.18	0.00245	1.19387	1.22
Ppp1r12b	0.000722	18.1	2.08e-05	7.05655	1.57
Lpp	0.00707	12.4	0.000437	3.44817	1.69
Tubd1	0.0178	10.1	0.0015	1.97156	1.17
Lonrf1	0.0109	11.3	0.000776	2.91488	1.09
Wnt2	1.07e-05	28	1.2e-07	1.53317	1.88
Cxadr	0.0263	9.1	0.00256	4.00572	1.09
Clec4b2	0.0275	8.99	0.00271	0.410756	1.18
Nebl	1.97e-07	37.1	1.14e-09	6.50498	2.43
Nlrp3	1.84e-06	32	1.57e-08	3.81519	1.41
Rad54l2	0.00496	13.2	0.000276	2.93418	1.63
Mpzl2	7.91e-09	44.2	3.03e-11	1.53358	2.35
Dip2c	0.000889	17.6	2.75e-05	5.6659	1.36
Dpp8	0.0013	16.6	4.61e-05	6.2314	1.11
Kpna5	0.0065	12.6	0.000392	3.04435	1.14
Ptx3	0.000872	17.6	2.66e-05	3.52546	1.06
Sorbs1	0.00315	14.3	0.000153	7.35434	1.88
Fam78a	0.0012	16.8	4.1e-05	3.71348	1.34
Naip6	8.51e-05	23.2	1.48e-06	2.9941	1.82
Mfsd8	0.0352	8.39	0.00378	3.29604	1.01
Rimkla	0.00452	13.4	0.000245	0.374637	1.55
Cep290	0.0128	10.9	0.000974	3.56203	1.09
Cybb	5.64e-19	95	1.91e-22	6.95747	1.75
Fyco1	2.86e-07	36.2	1.82e-09	6.6444	1.21
Il20rb	0.00177	15.8	7.01e-05	1.38461	1.61
RT1-CE16	4.59e-06	29.9	4.57e-08	1.69458	2.23
Slc11a1	2.01e-08	42.1	8.7e-11	4.38686	1.51
Utp20	0.000237	20.7	5.25e-06	5.06986	1.02
Wwc1	0.0347	8.42	0.00371	1.50093	1.14
Kdm7a	0.00228	15.2	9.82e-05	3.49542	1.91
Gpr141	0.000324	20	7.71e-06	0.0131219	1.89
Atp2b1	0.000116	22.4	2.2e-06	6.20376	1.43
Sh3pxd2b	0.00306	14.4	0.000146	3.9451	1.78
Dock7	0.000397	19.5	9.97e-06	5.24126	1.03
Ptafr	1.85e-05	26.8	2.29e-07	5.17063	1.03
Phf24	0.0126	10.9	0.000956	3.19949	1.2
Nxpe4	0.00701	12.4	0.000432	0.817646	1.33
Foxn3	0.000901	17.5	2.82e-05	4.71819	2.01
Tlr2	1.59e-13	68	1.67e-16	4.96991	1.7
Cpne3	0.001	17.3	3.22e-05	5.01417	1.65
Rbm47	5.08e-06	29.7	5.13e-08	2.49735	2.4
Cers4	0.0256	9.18	0.00245	4.42694	1.14
Tfec	3.1e-08	41.1	1.44e-10	1.88935	2.1
Bcl7a	0.000171	21.5	3.55e-06	1.48522	1.79
Shcbp1	0.00515	13.1	0.000291	2.38359	1.06
Ildr2	0.00298	14.5	0.000142	1.41002	1.7
Zfp106	2.08e-08	42	9.26e-11	7.60193	2.22
Hk2	2.53e-08	41.5	1.16e-10	6.7863	1.27
Trps1	2.23e-05	26.3	2.87e-07	3.24207	2.23
Stk17b	4.34e-06	30	4.27e-08	5.20784	1.11
Racgap1	0.0161	10.3	0.00131	1.92094	1.2
Pkia	2.12e-08	41.9	9.5e-11	7.23504	1.87
Myocd	0.00141	16.4	5.12e-05	4.86537	1.27
Mzt1	0.00337	14.2	0.000166	2.93619	1.1
Cebpe	0.00191	15.6	7.74e-05	1.97676	1.32
Ankle2	0.00907	11.8	0.000608	4.88327	1.08
Sowahc	1.56e-05	27.2	1.86e-07	3.4417	1.47
Pde4d	0.00753	12.2	0.000473	3.44115	1.66
RGD1565785	0.00148	16.3	5.49e-05	1.48414	1.42
Bmpr2	0.0012	16.8	4.12e-05	6.13212	1.31
Bub1b	0.00298	14.5	0.000142	2.40815	1.27
Med13	0.00355	14	0.000179	5.15826	1.31
Haus6	0.000698	18.2	2e-05	3.10586	1.24
Pdpn	3.21e-07	35.9	2.12e-09	5.76441	1.15
Ipo11	0.000137	22	2.71e-06	4.00695	1.32
Zfp398	0.0147	10.5	0.00117	1.72589	1.1
Lat2	0.00251	14.9	0.000112	2.94241	1.07
Il6	0.000373	19.7	9.25e-06	1.49987	1.44
Hjurp	0.0139	10.7	0.00108	2.91547	1.04
Themis2	0.000139	22	2.74e-06	4.00863	1.18
Fbxo40	0.00362	14	0.000184	4.80359	1.12
Bbx	0.0426	7.91	0.00493	2.62731	1.94
Casp8ap2	0.0024	15	0.000106	4.44231	1.04
Tmem241	0.0478	7.62	0.00577	1.41488	1.05
Nek9	0.000839	17.7	2.52e-05	5.86328	1.53
Mga	0.015	10.5	0.0012	5.30847	1.4
Lilrb4	4.89e-13	65.6	5.58e-16	6.6835	1.42
Supt16h	0.000151	21.8	3.05e-06	5.85086	1.09
Rassf5	0.00024	20.7	5.33e-06	4.03217	1.17
LOC100912076	0.00238	15	0.000105	0.392857	1.59
RGD1305184	0.00336	14.2	0.000165	0.477688	1.65
Tmem26	0.00167	16	6.47e-05	1.39156	1.6
Cog3	0.00377	13.9	0.000194	4.28681	1.03
Aim1	0.00016	21.6	3.27e-06	2.91062	1.32
Pm20d2	0.00264	14.8	0.000121	1.12309	1.9
Etv6	0.0084	11.9	0.000549	3.49308	1.08
Purg	0.0463	7.71	0.00551	1.46652	1.1
Fem1b	0.00447	13.5	0.000242	4.08906	1.24
Dtl	0.000524	18.9	1.39e-05	2.47873	1.45
LOC100363675	0.00351	14.1	0.000176	3.60696	1.17
Hmbox1	0.0103	11.4	0.000725	3.36694	1.55
Fabp1	0.000197	21.2	4.21e-06	-0.0314709	2.34
Cyp4f18	2.53e-10	51.9	5.7e-13	3.22553	2.01
Rap2b	0.000397	19.5	9.92e-06	2.69919	1.37
Gab2	0.0198	9.81	0.00174	4.37711	1.37
Stxbp4	0.0128	10.9	0.000971	2.29852	1.38
Spopl	0.000486	19.1	1.27e-05	3.35639	1.85
Lcp2	5.46e-06	29.5	5.53e-08	4.99201	1.15
Milr1	9.72e-13	63.9	1.29e-15	2.49602	2.5
Dmd	6.82e-06	29	7.18e-08	7.07964	1.19
Nfatc2ip	0.0335	8.51	0.00354	2.16168	1.01
Inpp4b	1.2e-06	32.9	9.52e-09	4.25529	1.8
Cul5	2.33e-06	31.4	2.06e-08	4.91856	1.56
Mbtps2	0.000581	18.6	1.58e-05	3.30817	1.1
Anln	6.35e-05	23.9	1.03e-06	3.47078	2
Ms4a7	0.044	7.82	0.00516	1.65921	1.01
Cdca2	0.00507	13.2	0.000285	1.89286	1.15
Rnf149	5.22e-09	45.2	1.82e-11	4.83048	1.43
Sbf2	0.00162	16	6.18e-05	5.60492	1.08
Rbm19	0.00771	12.2	0.000488	4.25927	1.07
Dock2	4.28e-06	30.1	4.19e-08	2.87972	2.26
Dcaf17	0.00863	11.9	0.000571	2.54686	1.69
Fbxo45	0.0329	8.55	0.00346	1.54671	1.07
Adcy7	0.00604	12.8	0.000356	5.14086	1.38
Crlf3	0.00102	17.2	3.29e-05	3.70682	1.13
Fcnb	4.91e-08	40.1	2.4e-10	4.40566	1.51
Vcan	2.58e-21	106	6.37e-25	8.26675	1.82
Trem3	2.16e-05	26.4	2.75e-07	1.79942	1.74
Man2a1	0.000721	18.1	2.07e-05	5.56991	1.08
Camk1d	1.73e-05	26.9	2.1e-07	2.58948	1.93
Arhgap15	0.00315	14.3	0.000153	2.18153	1.24
AABR07062799.2	0.00195	15.6	7.94e-05	0.929636	1.93
Vps50	0.000124	22.2	2.4e-06	3.68566	1.37
LOC102547897	0.046	7.72	0.00545	0.818218	1.13
Jmjd4	0.0316	8.65	0.00328	1.83688	1.12
Mob1b	0.000277	20.4	6.43e-06	4.35393	1.74
Dgki	0.00724	12.3	0.000451	1.44005	1.3
Cdkl5	0.00499	13.2	0.000279	1.62854	1.45
Tnik	0.00212	15.3	8.94e-05	3.95831	1.44
Sh2d1b	2.4e-07	36.6	1.46e-09	1.92232	2.88
Lif	0.00436	13.5	0.000234	2.41143	1.51
Slc12a6	0.00446	13.5	0.000241	4.70622	1.17
Itgb8	6.11e-06	29.3	6.27e-08	2.94113	2.71
Mybl1	0.000241	20.7	5.38e-06	3.96047	1.15
Clec4a3	5.05e-07	34.8	3.59e-09	5.12473	1.22
Mal	0.0202	9.76	0.00178	2.38085	1.02
Lmnb1	0.000109	22.6	2.04e-06	4.57783	1.07
Tarsl2	0.000511	19	1.34e-05	4.22975	1.1
Prkca	0.0107	11.3	0.000755	3.83882	1.02
RGD1310429	0.00338	14.2	0.000167	2.67302	1.27
Fam98b	0.00238	15.1	0.000105	2.96567	1.27
Cdv3	2.4e-07	36.6	1.45e-09	6.30606	1.49
Lacc1	3.04e-06	30.8	2.8e-08	2.20314	1.71
Hck	1.32e-07	37.9	7.35e-10	5.13929	1.26
Inpp5d	6.15e-05	23.9	9.9e-07	5.17784	1.03
Il6st	0.0259	9.14	0.0025	7.20315	1.27
Lonrf3	0.0212	9.64	0.00191	1.59967	1.19
Ptpre	0.000834	17.8	2.5e-05	4.55013	1.09
Bnc2	0.00155	16.2	5.85e-05	1.38888	1.67
Pbrm1	0.00649	12.6	0.000391	5.39005	1.51
Taok3	0.00119	16.8	4.05e-05	3.46667	1.48
Lars2	0.00432	13.6	0.000232	4.37432	1.08
Elovl7	0.0463	7.71	0.0055	0.652235	1.07
Mctp1	0.013	10.9	0.000987	0.31752	1.55
Bcl2a1	0.00012	22.3	2.31e-06	4.87625	1.08
Ncf4	0.000129	22.1	2.54e-06	4.92029	1
Ttc39b	0.0165	10.3	0.00136	3.55072	1.03
Erbb2	0.0473	7.65	0.00568	2.79796	1.14
Gnao1	0.0207	9.7	0.00184	4.50787	1.07
Actr2	2.68e-06	31.1	2.41e-08	7.21304	1.48
Zswim6	0.0366	8.28	0.004	3.06541	1.18
Snx30	0.000848	17.7	2.57e-05	3.13404	1.8
Ice1	0.0421	7.94	0.00485	5.40306	1.06
Ctsc	1.26e-10	53.4	2.75e-13	6.84896	1.26
Slc9a8	0.0162	10.3	0.00133	3.85956	1.21
Nod2	1.61e-05	27.1	1.93e-07	2.15135	1.73
C3ar1	1.1e-09	48.7	2.96e-12	3.86821	2.17
Hivep2	0.00233	15.1	0.000102	5.06363	1.09
Pi4k2b	0.00562	12.9	0.000324	3.69878	1.1
Prkaa2	9.26e-12	59	1.54e-14	5.33721	2.93
Clcn3	1.4e-05	27.4	1.63e-07	5.41485	1.39
MGC105567	0.00296	14.5	0.000141	1.79672	1.27
Pde4b	0.000225	20.9	4.93e-06	4.59909	1.41
Pdha1l1	0.000987	17.3	3.17e-05	4.69766	1.08
Ubash3b	0.00173	15.9	6.73e-05	4.27236	1.05
Olr1584	0.00196	15.5	8.04e-05	1.17752	1.49
Deptor	0.0298	8.79	0.00302	3.86671	1.25
Prkar2a	4.96e-06	29.7	4.99e-08	5.55813	2.02
Syk	8.46e-07	33.8	6.21e-09	5.6575	1.3
Rock2	4.2e-06	30.1	4.09e-08	8.06404	1.01
Fmnl2	4.39e-05	24.8	6.42e-07	4.15393	1.75
Ythdc2	0.0343	8.45	0.00364	3.12389	1.33
C3	0.0017	15.9	6.6e-05	3.06891	1.1
AABR07052585.1	0.000829	17.8	2.48e-05	3.78409	1.93
Xpot	0.000137	22	2.7e-06	5.64965	1.05
Dmxl1	0.00023	20.8	5.05e-06	5.65264	1.73
Noc3l	0.00102	17.2	3.31e-05	4.38642	1.02
Rab27b	0.0232	9.42	0.00215	0.158711	1.39
Prpf8	0.0018	15.8	7.19e-05	7.30375	1.02
Hipk3	0.000345	19.9	8.36e-06	6.2852	1.82
Cd300lf	0.000101	22.8	1.83e-06	3.10807	1.25
Tlr8	1.54e-08	42.7	6.43e-11	3.10124	2.55
Ncr3	0.00276	14.7	0.000128	1.26323	1.58
Gpatch2	0.00603	12.8	0.000355	2.92222	1.31
Ccnd2	1.73e-07	37.4	9.84e-10	5.68082	1.99
Bod1l1	0.0117	11.1	0.000862	5.01062	1.39
Zfp652	0.00135	16.5	4.82e-05	3.7916	1.2
Ipp	0.001	17.3	3.23e-05	3.41277	1.15
Secisbp2l	0.00351	14.1	0.000176	6.0299	1.04
Clip4	7.27e-05	23.6	1.21e-06	3.1945	1.67
Rad51	0.012	11	0.000893	1.47811	1.15
Ccser2	0.000698	18.2	2e-05	4.20291	1.64
Kif4a	0.0252	9.21	0.00241	2.13903	1.12
Gan	0.028	8.94	0.00279	2.14556	1.23
Pid1	6.21e-10	49.9	1.59e-12	5.70091	1.4
Tgfbr1	0.00032	20	7.6e-06	4.99416	1.03
St8sia4	0.00848	11.9	0.000558	3.88331	1.16
Desi2	0.000559	18.7	1.5e-05	4.22592	1.22
Siglec5	0.000278	20.3	6.47e-06	2.8267	1.24
Iqgap3	0.00016	21.7	3.27e-06	3.76302	1.21
Ptprj	9.83e-06	28.2	1.09e-07	5.45477	1.22
Tmem65	0.000477	19.1	1.24e-05	4.52921	1.11
Pik3cg	8.23e-06	28.6	8.87e-08	4.47884	1.36
Clec4d	1.87e-20	102	5.78e-24	4.58976	2.35
Slc40a1	0.0433	7.87	0.00504	2.11847	1.07
Ctnna3	1.97e-05	26.6	2.47e-07	3.24102	1.76
RGD1561662	0.000522	18.9	1.38e-05	1.56216	1.78
Lpin1	0.000332	19.9	7.96e-06	4.46371	1.52
Oas2	2.25e-07	36.8	1.34e-09	2.2695	2.1
AABR07005618.1	0.0111	11.2	0.000797	2.39582	1.19
Ifit1	2.11e-14	72.3	1.88e-17	4.7473	1.88
Fgr	5.49e-13	65.1	6.95e-16	5.49207	1.62
Cds1	5.54e-05	24.2	8.71e-07	0.823436	2.03
Kif1b	4.89e-06	29.8	4.91e-08	7.90877	1.04
Synpo2	4.76e-06	29.8	4.76e-08	7.12253	1.89
Myo7a	0.00684	12.4	0.000419	2.52906	1.32
Cux1	0.000337	19.9	8.11e-06	4.58081	1.97
Eya4	0.00231	15.1	0.000101	2.06166	1.69
Tmf1	0.0019	15.6	7.67e-05	5.92274	1.07
Pds5a	0.000428	19.3	1.09e-05	5.42839	1.47
Pik3cb	0.00201	15.5	8.32e-05	4.03933	1.4
Atg13	0.0103	11.4	0.000724	4.95114	1.18
Evi2a	4.65e-05	24.6	6.95e-07	4.17895	1.15
Ptpro	2.89e-07	36.1	1.86e-09	4.70382	1.27
Tbc1d7	0.0422	7.93	0.00486	2.08919	1.07
Rdx	0.00408	13.7	0.000216	5.79205	1.16
Lrrc8b	0.01	11.5	0.000695	3.69723	1.06
Slc38a1	3.92e-06	30.3	3.77e-08	4.73109	1.31
Rhov	0.00131	16.6	4.63e-05	2.16269	1.23
Pip4k2b	0.0229	9.44	0.00212	4.42704	1.39
Lrp12	0.0002	21.1	4.28e-06	3.60705	1.19
Lnp	0.00143	16.4	5.23e-05	3.16924	1.08
Ankrd52	0.00127	16.7	4.47e-05	6.23011	1.14
Cox15	0.00545	13	0.000311	3.93138	1.36
Top1	0.00271	14.7	0.000125	5.24895	1.02
Dock10	9.83e-06	28.2	1.09e-07	4.61283	1.28
LOC100912573	0.00255	14.9	0.000115	2.60258	1.51
Phactr1	0.000872	17.6	2.66e-05	2.51351	1.7
Dhx33	0.00265	14.8	0.000121	3.1671	1.51
Ddx6	0.00768	12.2	0.000485	5.60375	1.42
Atp13a3	0.000106	22.6	1.97e-06	2.54444	2.71
Ckap2l	0.00207	15.4	8.66e-05	1.28085	1.51
Synj1	0.00204	15.4	8.49e-05	5.50411	1.05
Arhgap30	2.64e-10	51.8	6.19e-13	5.44639	1.66
AABR07055919.2	0.018	10	0.00153	-0.547045	1.57
Ap1ar	0.00556	12.9	0.00032	4.53144	1.04
Rp2	3.47e-05	25.3	4.85e-07	2.61991	1.57
Fam208b	0.00231	15.1	0.000101	4.54484	1.19
Egr3	0.0142	10.6	0.00112	1.62257	1.34
Ipo8	0.00314	14.4	0.000151	4.31915	1.17
Psd3	0.00205	15.4	8.55e-05	3.3374	1.26
Cxcl2	2.02e-08	42.1	8.79e-11	2.37603	2.24
Gpr63	0.0106	11.4	0.000753	1.01225	1.96
Esco2	0.00114	17	3.83e-05	2.28747	1.27
Larp4b	0.00472	13.3	0.00026	5.09558	1.67
Gas2l3	0.000113	22.5	2.14e-06	3.27865	1.46
Cd101	4.29e-09	45.7	1.4e-11	2.2638	2.28
Mapre2	0.00179	15.8	7.12e-05	2.72896	1.8
Txlna	0.0145	10.6	0.00115	5.20626	1.06
Nt5c1a	1.34e-09	48.3	3.68e-12	1.50832	3.19
Ttc7a	7.35e-05	23.5	1.24e-06	5.01028	1.1
Tomm70	6.38e-08	39.5	3.21e-10	5.30358	1.33
AABR07059168.2	0.0162	10.3	0.00133	3.19105	1.51
Entpd7	0.00648	12.6	0.00039	1.06017	1.66
Trpv2	0.000222	20.9	4.85e-06	4.58611	1
Fcer1g	1.04e-07	38.5	5.47e-10	6.5368	1.08
Fbxo21	0.000422	19.4	1.07e-05	3.53215	1.31
Fyb	1.23e-10	53.5	2.61e-13	4.79114	1.76
Rrn3	0.0143	10.6	0.00113	4.11658	1.21
Far1	1.66e-05	27	2e-07	5.75546	1.03
Orc1	0.00318	14.3	0.000155	2.50803	1.1
Ralgps2	9.38e-05	22.9	1.69e-06	3.10181	1.35
Ino80	0.00657	12.5	0.000398	4.80339	1.29
Mad2l1	0.00204	15.5	8.45e-05	3.01882	1.02
Fn1	9.34e-22	109	2.02e-25	9.95644	1.95
Ptger2	1.46e-07	37.7	8.23e-10	2.69091	1.75
Nfe2l1	0.00174	15.9	6.82e-05	7.28514	1.24
Hcfc1	0.0054	13	0.000308	4.62811	1.76
Tlk1	0.00719	12.3	0.000446	2.18798	1.43
Lims1	0.0002	21.1	4.29e-06	5.72146	1.65
Zfp664	6.4e-06	29.2	6.64e-08	3.21196	2.17
Cxcl1	2.62e-05	26	3.42e-07	3.26898	1.32
Anpep	5.49e-13	65.2	6.82e-16	6.50329	1.39
Siglech	0.00126	16.7	4.38e-05	1.06301	1.55
Pygl	1.1e-10	53.7	2.31e-13	4.4021	1.71
Prg4	0.000119	22.3	2.28e-06	4.4282	1.06
Kpna4	8.17e-06	28.6	8.75e-08	6.10286	1.39
LOC680227	0.0317	8.64	0.00329	-0.555593	1.4
Ago2	0.000106	22.6	1.97e-06	4.30843	1.52
Lclat1	0.0166	10.2	0.00137	3.54455	1.18
Bptf	0.0303	8.75	0.0031	5.82831	1.15
43714	0.000141	21.9	2.81e-06	3.48327	1.22
Zyg11b	0.000149	21.8	3e-06	4.30256	1.97
Paqr8	9.38e-05	22.9	1.68e-06	3.46125	2.04
Gsk3b	0.000244	20.7	5.47e-06	5.22027	1.38
Atl3	0.00272	14.7	0.000125	4.70292	1.26
Ociad2	0.0239	9.33	0.00225	0.421518	1.12
Slc25a13	0.000659	18.4	1.83e-05	4.78557	1.02
Alkbh8	0.00937	11.7	0.000637	1.98049	1.2
Itga9	0.000533	18.8	1.42e-05	5.21718	1.56
Tbx20	0.000684	18.3	1.94e-05	4.50912	2.27
RGD1563091	2.12e-08	41.9	9.57e-11	5.09654	1.37
Cenpi	0.005	13.2	0.000279	1.60389	1.22
Pgap1	0.0135	10.7	0.00105	1.87935	1.51
LOC100909671	1.25e-07	38.1	6.79e-10	1.53174	2.18
Lilrb3l	1.64e-06	32.2	1.39e-08	4.46406	1.46
Ms4a6c	0.000415	19.4	1.05e-05	2.61855	1.22
Baz1a	0.000659	18.4	1.83e-05	4.5859	1.2
Pld1	0.000524	18.9	1.38e-05	4.07458	1.12
Ccr5	5.48e-14	70.2	5.24e-17	5.28002	2.09
Adcy9	0.00687	12.4	0.000422	3.0642	1.49
Amz1	0.00572	12.9	0.000332	3.88615	1
Arhgap44	0.00264	14.8	0.00012	4.46875	1.46
Cdca5	0.00101	17.3	3.26e-05	0.901789	1.66
Slc6a6	0.0346	8.43	0.00369	6.12459	1.33
Cdk12	0.0128	10.9	0.00097	4.73348	1.05
A930018M24Rik	0.0424	7.92	0.00489	0.0525939	1.64
Plb1	0.0126	10.9	0.00095	2.89111	1
Cxcl3	2.82e-07	36.2	1.79e-09	2.48166	2.08
Xylt1	0.00651	12.6	0.000393	2.38471	1.73
Susd3	8.97e-05	23.1	1.58e-06	2.09726	1.57
Dgkd	0.0106	11.4	0.000752	5.65271	1.12
Map1b	0.00027	20.4	6.18e-06	6.60469	1.07
Tiam1	0.00258	14.8	0.000117	3.13776	1.64
Lin7c	4.29e-05	24.8	6.26e-07	4.03482	1.36
Mfsd1	9.28e-06	28.3	1.02e-07	5.83492	1.13
Fam120a	0.00278	14.7	0.000129	6.64364	1.23
Celf2	6.28e-06	29.2	6.47e-08	3.90726	1.8
Gnb4	0.00168	16	6.49e-05	4.07523	1.08
Lrrk2	3.71e-05	25.2	5.27e-07	5.62877	1.19
Tmem170b	0.00382	13.9	0.000198	2.04871	1.43
Cbl	0.00428	13.6	0.000229	3.75313	1.79
Edem1	9.86e-06	28.2	1.1e-07	5.87467	1.28
Oas3	2.57e-08	41.5	1.19e-10	2.32413	2.66
Ascc2	0.00121	16.8	4.16e-05	4.74885	1.04
Nr3c1	0.0257	9.16	0.00247	4.26355	1.86
Rhou	0.00872	11.8	0.00058	-0.0113653	1.4
Slc7a8	1.49e-12	63	2.09e-15	4.76248	1.73
Cd244	0.00367	14	0.000187	3.18761	1.09
Dock5	0.000785	17.9	2.32e-05	3.77699	1.93
RGD1564420	7.33e-05	23.5	1.23e-06	5.23317	1.14
Acadsb	0.0454	7.75	0.00536	4.55629	1.04
Synpo	0.0077	12.2	0.000487	5.97568	1.37
Dsg3	5.3e-13	65.3	6.32e-16	2.13671	2.68
Gpam	8.05e-07	33.9	5.89e-09	4.92373	1.92
Arnt	0.0133	10.8	0.00102	4.84566	1.1
Adra1a	0.000449	19.2	1.15e-05	4.00144	1.9
Fam53c	0.0191	9.9	0.00165	3.85521	1.25
Srp72	0.000108	22.6	2.03e-06	5.12579	1.4
Clec5a	3.58e-06	30.5	3.38e-08	4.04822	1.35
Zfp622	0.00223	15.2	9.48e-05	3.29088	1.17
Mmp8	0.00097	17.4	3.1e-05	2.77777	1.15
Slc25a30	0.000579	18.6	1.57e-05	4.21991	1.38
Epha3	0.00174	15.9	6.82e-05	3.23533	1.09
Gfod1	0.008	12.1	0.000515	4.30556	1.75
Tecpr2	0.0125	10.9	0.000941	3.14963	1.43
Erbb4	2.34e-06	31.4	2.07e-08	1.22359	2.73
Prrg4	0.00224	15.2	9.59e-05	2.35557	1.91
Rgs18	0.00156	16.1	5.94e-05	2.66374	1.22
Igf1r	0.00847	11.9	0.000556	3.6291	1.15
Olr1587	0.00229	15.2	9.88e-05	-0.262449	1.78
Flrt2	0.0112	11.2	0.000812	2.67817	1.42
Ncapd3	0.00209	15.4	8.78e-05	3.89581	1.01
Rgs1	2.75e-05	25.9	3.63e-07	2.37474	1.63
Kdm5a	0.00085	17.7	2.57e-05	5.92399	1.01
Serac1	0.0362	8.31	0.00393	1.7585	1.01
Celsr1	0.00149	16.3	5.52e-05	3.17674	1.5
Ssh1	0.0297	8.8	0.00301	3.67944	1.29
Rufy4	0.000436	19.3	1.11e-05	0.827066	1.75
Zfp281	0.011	11.3	0.000792	4.23821	1.35
Gja3	0.000242	20.7	5.4e-06	3.57932	1.51
Tmed5	3.88e-05	25.1	5.58e-07	3.84471	1.51
Fbxl17	0.00122	16.8	4.2e-05	5.09043	1.2
Pign	0.0102	11.5	0.000708	3.37849	1.39
Eif4g1	0.000637	18.4	1.76e-05	7.52787	1.3
Zbtb41	0.000492	19	1.28e-05	3.02721	1.88
Pglyrp1	0.014	10.7	0.00109	1.10613	1.17
LOC100361457	3.83e-07	35.5	2.6e-09	7.11538	1.06
Glul	8.14e-09	44.1	3.14e-11	8.29552	1.09
Nhlrc1	0.000524	18.9	1.39e-05	3.50333	1.13
Stat6	0.00455	13.4	0.000247	5.75885	1.15
Pole	0.00134	16.5	4.8e-05	3.69946	1.12
Map2k4	0.00322	14.3	0.000158	4.19746	1.08
Trib1	9.19e-05	23	1.64e-06	4.9593	1.31
Mmp9	1.76e-13	67.6	1.96e-16	3.27221	2.29
Mapk13	0.00161	16.1	6.14e-05	1.73079	1.37
Reln	0.0471	7.67	0.00562	4.1201	1.09
Zbtb20	0.000919	17.5	2.89e-05	4.57476	2.04
Brap	0.00544	13	0.00031	3.93989	1.16
Iqgap2	1.78e-05	26.9	2.18e-07	4.37685	1.68
Utp15	0.000885	17.6	2.73e-05	4.12193	1.17
Kcnk13	0.00617	12.7	0.000366	1.49718	1.15
Kntc1	0.000227	20.8	4.97e-06	3.57808	1.38
Slc25a36	0.0476	7.63	0.00575	4.46162	1.22
Ppp1r26	0.00552	13	0.000317	1.73396	1.73
Hps3	5.1e-05	24.4	7.82e-07	4.22984	1.15
Abcb7	4.97e-05	24.5	7.5e-07	4.03935	1.44
Mlxip	0.0319	8.62	0.00332	4.54606	1.28
Raph1	2.94e-05	25.7	3.96e-07	5.15765	1.62
Cd28	0.0002	21.1	4.26e-06	0.419005	2.02
Rrm2	0.000202	21.1	4.34e-06	3.18365	1.26
Rbms3	0.0112	11.2	0.00081	2.36393	1.06
Tmc7	0.00155	16.1	5.86e-05	2.81591	1.48
Hcar2	2.8e-06	31	2.56e-08	0.895288	2.35
Scai	0.0114	11.2	0.000826	2.21062	1.36
Naa25	0.000659	18.4	1.83e-05	4.5334	1.21
Elf4	0.0189	9.92	0.00163	3.43837	1.21
Sgk3	0.000101	22.8	1.84e-06	2.34466	1.47
Fbxo48	0.00393	13.8	0.000205	-0.340757	1.66
Insr	0.00152	16.2	5.68e-05	5.42958	1.15
Mcemp1	3.69e-09	46	1.16e-11	4.45733	1.58
Ccl6	2.78e-07	36.2	1.76e-09	6.11358	1.17
Fam168b	0.0102	11.5	0.000712	6.01864	1.02
Arl5b	0.00532	13.1	0.000303	4.18756	1.15
Gpr35	0.000743	18	2.16e-05	-0.537391	2.3
AABR07029863.1	0.0333	8.52	0.00352	-1.49581	1.96
Wapl	0.00241	15	0.000107	5.46936	1.06
Clic4	4.71e-05	24.6	7.05e-07	7.1893	1.6
Nr2c2	0.0221	9.53	0.00202	3.84091	1.48
Arl5a	4.64e-08	40.2	2.25e-10	5.91046	1.31
Topbp1	0.00242	15	0.000108	4.09004	1.21
Ralgapa2	0.000919	17.5	2.89e-05	4.61577	1.63
Abr	0.0229	9.44	0.00212	5.13613	1.18
Surf4	0.000195	21.2	4.16e-06	3.71662	1.29
Parp12	0.000499	19	1.3e-05	3.85412	1.18
Aoah	1.98e-09	47.4	5.76e-12	1.75915	2.47
Pla2g7	1.36e-06	32.6	1.12e-08	5.23426	1.17
BC030336	0.014	10.7	0.00109	2.4613	1.17
Plxnc1	0.0173	10.1	0.00145	2.3785	1.39
Tob2	0.0117	11.1	0.000861	5.00041	1.03
Mafb	3.36e-08	40.9	1.59e-10	5.09411	1.35
Fam185a	0.00179	15.8	7.12e-05	2.6232	1.21
Rab11fip1	1.16e-05	27.8	1.32e-07	3.19037	1.62
Il6r	1.06e-05	28	1.19e-07	4.94757	1.3
Trpm2	0.000179	21.4	3.75e-06	3.63472	1.58
Atrnl1	0.0105	11.4	0.000742	3.83351	1.33
Map2k7	0.0376	8.22	0.00414	4.54092	1.03
Il1rl2	0.000262	20.5	5.95e-06	1.76994	1.5
Cnr2	5.46e-05	24.2	8.56e-07	2.89585	1.34
Rab8b	2.87e-07	36.1	1.84e-09	5.81492	1.19
Slc4a4	0.0213	9.62	0.00192	2.73271	1.44
Sh3rf3	0.000666	18.3	1.86e-05	2.11896	1.66
Ntn4	0.0059	12.8	0.000345	4.76962	1.03
Lpgat1	3.43e-09	46.2	1.07e-11	5.19424	1.71
Cd300a	3.65e-10	51.1	8.66e-13	4.1535	1.73
RT1-CE16	4.31e-08	40.4	2.08e-10	5.23082	1.27
Oasl2	1.76e-05	26.9	2.15e-07	5.48793	1.06
AABR07066753.1	0.0013	16.6	4.61e-05	-1.52606	3.2
Fry	0.00748	12.2	0.000468	6.78564	1.01
AABR07001099.1	0.00793	12.1	0.000508	2.25251	1.26
Fam168a	0.0207	9.7	0.00185	4.76198	1.14
AC106292.2	0.00112	17	3.73e-05	5.17846	1.13
Bach1	0.000168	21.5	3.45e-06	3.89849	2.32
Nkrf	0.00161	16.1	6.14e-05	1.07109	1.75
Eea1	0.000277	20.4	6.43e-06	5.36475	1.57
Glis3	3.49e-05	25.3	4.9e-07	1.95174	2.57
Fnip2	0.041	8.01	0.00466	4.89731	1.47
Prkcb	0.00233	15.1	0.000102	2.4018	1.23
Hspa8	0.00457	13.4	0.00025	4.39388	1.32
Wac	0.00204	15.5	8.47e-05	5.53791	1.03
Sertad2	0.00342	14.1	0.00017	2.79376	1.53
Lyn	1.85e-06	31.9	1.59e-08	6.43004	1
Wdhd1	0.00503	13.2	0.000282	3.63596	1.04
AABR07058886.1	0.00298	14.5	0.000142	3.67357	1.38
Runx1	0.0014	16.4	5.06e-05	3.63564	1.04
Npc1	9.05e-05	23	1.6e-06	5.21759	1.13
Zfp407	0.017	10.2	0.00141	3.94372	1.1
Kif21a	0.0438	7.84	0.0051	3.01965	1.16
AC096601.1	0.00866	11.9	0.000575	2.73016	1.66
Mcart1	0.00143	16.4	5.21e-05	1.7822	1.42
Ttc3	0.0176	10.1	0.00148	6.216	1.03
Msr1	6.95e-23	115	8.58e-27	5.98814	2.57
Emilin2	1.05e-10	53.8	2.18e-13	5.48389	1.65
Rnf24	0.0387	8.15	0.00431	-0.203959	1.54
RGD1560455	0.00652	12.6	0.000394	1.75428	1.23
Cd180	3.1e-07	36	2.02e-09	3.66706	1.51
Paip2b	0.00793	12.1	0.000507	2.24796	1.14
Myo9a	0.00315	14.3	0.000153	5.05918	1.63
Mme	0.00424	13.6	0.000226	1.91433	1.22
Hif1a	1.17e-08	43.3	4.78e-11	6.82869	1.2
Nek7	1.11e-06	33.1	8.64e-09	5.08909	1.77
Zbtb37	0.0169	10.2	0.0014	1.49316	1.41
Pola1	0.000414	19.4	1.04e-05	3.71083	1.11
Adrbk2	9.98e-06	28.2	1.11e-07	1.56654	2.15
Bco2	0.00804	12	0.000518	2.31359	1.03
Map3k2	0.0102	11.5	0.000711	3.12265	1.53
Pou2f2	0.00965	11.6	0.000662	2.2517	1.08
Dnajc13	9.08e-05	23	1.62e-06	6.0752	1.25
Dtx3l	0.0116	11.1	0.000848	3.9434	1.01
Kcna3	1.32e-05	27.5	1.54e-07	1.6883	2.88
Nhlrc2	0.00421	13.6	0.000224	4.87053	1.14
Zfp462	0.0269	9.04	0.00264	3.08173	1.11
Arhgef17	0.0149	10.5	0.00119	5.81578	1.12
Tmem87a	0.00151	16.2	5.63e-05	4.37791	1.08
Dlc1	0.0201	9.77	0.00177	6.40989	1.1
Nlrc4	2.81e-06	31	2.58e-08	2.18432	1.93
Arrdc3	3.3e-06	30.6	3.1e-08	4.89668	1.76
Lyz2	1.77e-18	92.6	6.56e-22	10.1525	1.52
Alg10	0.000733	18.1	2.13e-05	3.31692	1.71
Jarid2	0.00701	12.4	0.000432	5.15108	1.17
Diaph2	0.0262	9.11	0.00255	1.77412	1.44
Spen	0.0188	9.95	0.00161	5.58832	1.01
Spta1	7.79e-05	23.4	1.33e-06	4.94293	1.21
RGD1562339	0.00121	16.8	4.16e-05	3.05654	1.7
Tnfaip3	0.00782	12.1	0.000499	3.55028	1.34
Cfh	1.06e-22	114	1.63e-26	6.52136	1.99
Klhl28	0.00122	16.8	4.2e-05	2.66621	1.55
Gli3	0.00955	11.6	0.000654	2.36211	1.72
Ccl12	1.36e-06	32.6	1.11e-08	3.90459	1.45
Cpeb4	0.00231	15.1	0.0001	5.24024	1.78
Neo1	0.00123	16.8	4.24e-05	4.47395	1.08
Dmxl2	0.000183	21.3	3.84e-06	3.88132	1.43
Ifit3	1.18e-12	63.5	1.6e-15	4.99554	1.63
Thap2	0.0112	11.2	0.000805	2.02371	1.44
Fermt3	9.66e-09	43.7	3.85e-11	5.59391	1.56
Aqp9	1.81e-08	42.3	7.64e-11	1.5365	2.33
Nhsl1	0.0321	8.6	0.00336	4.2548	1.12
Atf6	2.08e-06	31.7	1.81e-08	5.61264	1.62
Kat6a	0.015	10.5	0.0012	6.01288	1.29
Pml	0.0151	10.5	0.00122	4.01777	1.18
Ccdc93	0.000189	21.3	4.01e-06	4.58931	1.08
Cep76	0.0041	13.7	0.000217	2.77105	1.04
Agps	0.000112	22.5	2.12e-06	4.95723	1.75
Mfap3	0.0498	7.52	0.0061	3.2137	1.14
Irs1	0.000211	21	4.56e-06	3.66408	1.69
Slco4a1	0.000863	17.7	2.62e-05	1.74932	1.44
Snx13	8.83e-07	33.7	6.57e-09	5.03649	1.38
Fam65b	0.0266	9.08	0.00259	4.03782	1.09
Treml2	0.0138	10.7	0.00107	0.762163	1.96
Tnfrsf1b	6.34e-05	23.9	1.03e-06	4.89294	1.18
Clec2d	0.000891	17.6	2.78e-05	1.09106	2.12
Wdfy4	6.4e-05	23.8	1.05e-06	4.6365	1.29
Cenpo	0.0231	9.43	0.00214	1.40175	1.04
Rab7b	0.000901	17.5	2.82e-05	4.44894	1.03
Tbc1d24	0.00609	12.7	0.000359	3.25573	1.2
Apaf1	0.00397	13.8	0.000209	4.77373	1.01
Fndc3b	0.0151	10.5	0.00121	5.57851	1.59
Tiparp	1.86e-05	26.8	2.31e-07	3.86237	1.77
Nsd1	0.0164	10.3	0.00134	6.34255	1.49
Ank2	6.64e-06	29.1	6.96e-08	5.09253	2.33
Uprt	5.89e-05	24.1	9.38e-07	2.46752	2.04
Bend6	0.00482	13.3	0.000267	1.78418	1.2
Ifit1bl	5.41e-11	55.2	1.07e-13	4.66517	1.69
Fgd3	1.65e-05	27	1.99e-07	4.66865	1.14
Cadps	0.000869	17.7	2.64e-05	2.89841	1.63
Rasgrp4	0.000935	17.5	2.95e-05	4.2224	1.35
Spp1	1.54e-09	48	4.27e-12	10.0477	1.18
Hmox1	4.05e-17	85.6	2.25e-20	6.95413	1.62
Tp53inp1	0.00588	12.8	0.000343	2.53631	1.6
Kpna6	7.05e-05	23.6	1.17e-06	5.73173	1.08
Dock8	4.37e-06	30	4.31e-08	5.32567	1.4
Hdac4	0.0156	10.4	0.00126	3.33458	1.3
LOC685025	0.000168	21.5	3.46e-06	3.45245	1.66
AABR07057495.1	0.0274	9	0.00271	1.17058	1.77
Sp3	0.000173	21.5	3.59e-06	4.93925	1.51
Cep350	0.0144	10.6	0.00113	5.09594	1.62
Gabrb2	6.75e-14	69.8	6.66e-17	0.756121	3.98
Palld	0.0189	9.92	0.00163	5.7133	1.16
C5ar1	3.38e-09	46.2	1.04e-11	5.49095	1.33
Zbtb10	0.022	9.54	0.00201	3.30267	1.06
Cd24	0.00936	11.7	0.000634	1.10212	1.2
Mfap3l	1.04e-07	38.5	5.48e-10	3.7233	2.08
Fsd1l	1.16e-08	43.3	4.71e-11	3.90648	2.31
Glipr1	1.06e-08	43.5	4.23e-11	5.27389	1.37
Elmod2	0.00977	11.6	0.000674	2.62258	1.86
Nt5dc3	2.64e-10	51.8	6.2e-13	3.22068	2.18
Havcr2	7.04e-05	23.6	1.16e-06	1.95841	1.55
Tmem8a	1.32e-05	27.5	1.53e-07	3.87709	1.44
Lpcat2	2.94e-05	25.7	3.96e-07	4.17456	1.2
Nacc2	0.00103	17.2	3.38e-05	4.47787	1.44
Qpct	0.00633	12.6	0.000377	1.54906	1.21
Pdk4	6.31e-06	29.2	6.53e-08	5.2322	1.57
Dgkh	0.0014	16.4	5.08e-05	3.75054	1.83
Igsf6	4.29e-09	45.7	1.39e-11	4.56268	1.55
Mex3a	0.0389	8.14	0.00433	0.944476	1.37
Ascc3	0.000103	22.7	1.91e-06	5.26281	1.25
Dck	0.000376	19.6	9.37e-06	2.32666	1.53
Lrp1	8.83e-07	33.7	6.57e-09	9.12948	1.2
Kif20b	0.0141	10.7	0.0011	2.17214	1.02
Cyld	0.0026	14.8	0.000119	4.04231	1
Nf1x	0.0185	9.98	0.00158	4.69116	1.36
Tmx3	0.0016	16.1	6.11e-05	4.93751	1.15
LOC100910957	0.0116	11.1	0.000851	2.11954	1.31
Retnlg	1.11e-05	27.9	1.25e-07	0.884353	2
Klf6	0.0102	11.5	0.000709	5.39247	1.09
RGD1566359	0.023	9.44	0.00213	4.6829	1.4
Phldb2	0.000683	18.3	1.93e-05	5.29227	1.24
Zbtb7b	0.00015	21.8	3.03e-06	5.38828	1.25
Zcchc6	0.015	10.5	0.0012	6.11656	1.08
Edem3	0.00337	14.2	0.000167	4.8592	1.74
Ank3	0.000891	17.6	2.77e-05	5.52264	1.1
Fam46a	0.00183	15.7	7.34e-05	3.88524	1.52
Oscar	1.18e-06	33	9.32e-09	3.4018	1.52
Skil	0.0018	15.8	7.2e-05	4.35579	1.63
Acbd5	0.0021	15.4	8.83e-05	4.31994	1.17
Tmem168	8.34e-05	23.2	1.45e-06	3.96052	1.3
Pygb	4.54e-05	24.7	6.75e-07	6.94355	1.13
Rab32	7.7e-08	39.1	3.94e-10	5.18158	1.26
Itch	0.00915	11.7	0.000617	4.81065	1.25
Rn50_10_0701.2	2.08e-08	42	9.22e-11	3.09918	1.72
Rest	0.00241	15	0.000107	4.43905	1.75
Clec4e	4.59e-12	60.5	7.23e-15	3.32156	2.03
43531	0.00159	16.1	6.04e-05	5.1124	1.11
Hs6st2	0.000638	18.4	1.76e-05	1.41742	1.66
Plk4	0.00203	15.5	8.4e-05	3.25933	1.07
Pla2g4a	1.98e-05	26.6	2.49e-07	3.80017	1.35
LOC100910708	0.000947	17.4	3.01e-05	0.381854	2.14
LOC100360575	3.24e-05	25.5	4.42e-07	-0.172397	2.4
Ganc	0.0317	8.64	0.00329	3.49878	1
Arid3a	0.00639	12.6	0.000383	3.85191	1.26
Fancd2	0.0015	16.2	5.56e-05	2.52333	1.27
Creb3l2	0.0191	9.9	0.00165	5.46527	1.15
RGD1359108	0.00639	12.6	0.000382	3.437	1.26
Hacd4	0.0198	9.81	0.00173	2.34386	1
Vps13c	0.00136	16.5	4.87e-05	5.68738	1.42
Slc26a2	0.0207	9.69	0.00185	2.89269	1.6
Gk5	0.00073	18.1	2.11e-05	0.383521	2.06
Tlr4	1.93e-05	26.7	2.41e-07	3.45078	1.4
Ipo5	4.91e-08	40.1	2.41e-10	7.78211	1.15
Il10ra	1.06e-06	33.2	8.13e-09	3.00231	1.98
Tcp11l1	0.00662	12.5	0.000403	1.86072	1.57
Mpp7	0.000468	19.1	1.21e-05	3.07614	1.26
Zmat3	0.00192	15.6	7.8e-05	2.68494	1.51
Nek2	0.00295	14.5	0.00014	1.18971	1.39
Gpt2	0.00635	12.6	0.00038	2.69025	1.16
AABR07021804.1	5.28e-05	24.3	8.16e-07	1.1486	2.41
Nup160	0.000944	17.4	2.99e-05	3.83843	1.41
Atf7	0.0405	8.04	0.00458	4.14327	1.28
Atad2	0.00381	13.9	0.000197	4.23315	1.37
Usp5	6.44e-05	23.8	1.06e-06	4.91044	1.13
Fam105a	3.47e-05	25.3	4.85e-07	4.2154	1.17
Rbm25l1	0.00609	12.7	0.000359	4.60625	1.12
Ppm1k	6.56e-07	34.3	4.72e-09	5.22564	1.75
Il18rap	0.00447	13.5	0.000242	2.7198	1.01
Arhgap26	0.00756	12.2	0.000476	3.68941	1.67
Atxn7l3	0.0234	9.39	0.00218	4.29039	1.05
Ampd3	7.91e-05	23.3	1.36e-06	6.02867	1
Il1rap	0.00233	15.1	0.000102	3.84784	1.15
Plekho2	0.00231	15.1	0.0001	4.98083	1.55
AABR07001519.1	0.00513	13.1	0.000289	1.02208	1.35
Rnf4	0.000569	18.7	1.54e-05	5.19359	1.16
Atp11a	0.0189	9.92	0.00163	5.91324	1.03
Zscan22	0.0287	8.89	0.00287	2.41294	1.09
MGC105649	3.97e-06	30.2	3.85e-08	5.09066	1.13
Syne3	0.00681	12.5	0.000417	3.22206	1.54
Polr3g	0.000889	17.6	2.76e-05	2.89885	1.15
Zbtb43	0.00506	13.2	0.000284	2.36579	1.62
Rn50_5_0791.1	6.15e-05	23.9	9.91e-07	1.68986	3.15
Larp1	2.67e-05	26	3.5e-07	6.0517	1.46
Nemp1	0.00238	15.1	0.000105	1.6366	1.68
Pde12	0.00766	12.2	0.000484	3.08363	1
Nhlrc3	0.0248	9.24	0.00236	3.93168	1.28
Hspa9	3.02e-06	30.9	2.78e-08	7.93548	1.2
Abcg2	0.0219	9.56	0.00199	1.66624	1.02
Glrx	1.41e-07	37.8	7.9e-10	5.20658	1.31
Gatad2b	0.0389	8.14	0.00434	3.66926	1.1
Siglec1	1.73e-05	26.9	2.11e-07	4.31904	1.35
Cpeb2	0.0222	9.52	0.00203	4.1332	1.25
Ppara	3.47e-06	30.5	3.26e-08	2.97196	2.03
Ltb4r	0.00274	14.7	0.000127	3.23197	1.06
AABR07024972.1	0.000129	22.1	2.54e-06	0.615575	1.95
Nphp3	0.027	9.03	0.00265	2.69537	1.11
Abhd15	0.0309	8.7	0.00318	1.69241	1.07
Zfp26	0.0474	7.65	0.00569	3.26434	1.11
Tead1	4.36e-09	45.6	1.45e-11	4.92168	2.32
Arid2	0.023	9.44	0.00212	4.86394	1.33
Rap1gap2	1.55e-05	27.2	1.83e-07	5.77603	1.07
Ptbp3	0.00489	13.3	0.000271	5.34215	1.34
Trem1	5.46e-11	55.2	1.1e-13	3.81288	1.92
Peak1	0.0174	10.1	0.00145	5.28045	1.39
Top3a	0.0385	8.16	0.00427	3.31153	1.19
Rgs14	0.000414	19.4	1.04e-05	3.9241	1.1
RGD1559575	0.000189	21.3	3.98e-06	3.29585	1.22
Ap4e1	0.0266	9.08	0.00259	3.26623	1.14
Hipk2	7.06e-15	74.8	5.23e-18	6.30099	3.06
Cacna2d1	5.4e-08	39.9	2.68e-10	5.23534	2.51
Psd4	2.51e-05	26.1	3.28e-07	3.96996	1.4
Smcr8	0.00144	16.3	5.28e-05	3.7512	1.98
Ano5	0.00125	16.7	4.36e-05	2.21287	2.05
Sbno1	0.000158	21.7	3.23e-06	6.01812	1.08
Nlrp12	2.78e-07	36.2	1.74e-09	1.85066	1.95
Alcam	5.2e-08	40	2.57e-10	5.02922	1.48
Slc25a44	0.0174	10.1	0.00146	2.88387	1.25
Itgal	4.12e-07	35.3	2.81e-09	4.97005	1.52
Rnf13	0.00634	12.6	0.000379	4.5384	1.07
Npl	1.16e-06	33	9.09e-09	3.5958	1.43
Zfp445	0.0473	7.65	0.00567	4.33943	1.3
Ero1a	2.5e-11	56.9	4.56e-14	6.16031	1.6
Whsc1l1	0.0189	9.93	0.00163	5.2334	1.26
Tmem71	0.000607	18.5	1.66e-05	2.04997	1.39
Prex1	0.00339	14.2	0.000167	5.54418	1.26
Fam129a	0.0382	8.18	0.00423	4.39201	1.36
Ptar1	0.000826	17.8	2.47e-05	3.4205	1.49
Mybbp1a	3.38e-05	25.4	4.65e-07	6.53073	1.01
Gnptab	0.000256	20.6	5.76e-06	5.40461	1.19
Stc2	0.000189	21.3	4e-06	3.32307	1.22
Mfsd14a	0.00348	14.1	0.000174	1.47326	1.31
Cyb5d1	0.0198	9.82	0.00172	2.03791	1.44
Ptpn1	3.42e-05	25.4	4.74e-07	5.0482	1.17
Ireb2	0.000103	22.7	1.9e-06	5.1141	1.18
Cers6	0.000179	21.4	3.75e-06	3.07531	2.62
Zfp217	0.0233	9.39	0.00218	4.03096	1.21
Tecrl	0.000767	18	2.26e-05	5.03255	1.11
Klrk1	1.11e-05	27.9	1.26e-07	2.55306	1.78
Slamf8	4.5e-05	24.7	6.68e-07	3.20604	1.31
Prkacb	0.00138	16.5	4.98e-05	4.70918	1.55
Retn	0.00357	14	0.00018	-0.00528043	1.91
Dock11	0.000236	20.8	5.2e-06	4.71414	1.09
Chrm2	8.77e-08	38.9	4.52e-10	5.12267	2.61
Rab11fip5	0.0135	10.8	0.00104	5.9798	1.16
RT1-M6-1	0.0129	10.9	0.000979	0.988967	1.23
Pacs2	0.0263	9.1	0.00255	5.0103	1.06
Atad5	0.00236	15.1	0.000103	2.75772	1.46
Kbtbd8	0.00122	16.8	4.2e-05	2.39325	1.25
Hmmr	0.000947	17.4	3.01e-05	2.57745	1.21
Erbb3	8.98e-05	23	1.58e-06	4.16188	1.32
RGD1309995	0.00779	12.1	0.000496	5.41223	1.25
Foxk1	0.0261	9.12	0.00253	4.18923	1.22
AABR07055280.1	0.00073	18.1	2.11e-05	4.36308	1.34
Csf1r	3.13e-09	46.5	9.28e-12	7.01576	1.3
Sdc1	1.67e-11	57.8	2.94e-14	5.92855	1.42
Csf2rb	0.000287	20.3	6.68e-06	6.20211	1.36
Eya3	0.00201	15.5	8.31e-05	5.12912	1.13
Tnks	0.0116	11.1	0.000857	5.00067	1.2
Zbtb26	0.0269	9.04	0.00264	1.60581	1.08
Crebrf	0.00248	14.9	0.000111	5.15077	1.1
Trove2	0.00425	13.6	0.000227	3.93678	1.71
Cyfip2	1.12e-06	33.1	8.73e-09	3.64194	1.64
Rictor	0.0276	8.98	0.00273	4.19543	1.46
Ikbkg	0.0143	10.6	0.00112	3.36267	1.1
Adamts9	0.00361	14	0.000183	6.82978	1.13
Lhfpl2	5.9e-09	44.9	2.09e-11	5.21684	1.46
Rnf38	0.0191	9.91	0.00164	4.04431	1.19
Susd6	0.005	13.2	0.00028	5.33192	1.41
AABR07010705.1	0.0369	8.27	0.00403	1.83025	1.04
Dpysl2	0.02	9.78	0.00176	6.13977	1.08
Cbfa2t2	0.0172	10.2	0.00143	3.75222	1.31
Arhgef6	0.00954	11.6	0.000652	4.86237	1.08
Ccdc88a	0.00195	15.6	7.94e-05	4.66933	1.54
Abca5	0.000155	21.7	3.15e-06	2.81151	1.41
Slc47a1	1.15e-05	27.9	1.31e-07	2.28969	1.88
Hivep3	0.00175	15.8	6.92e-05	2.97331	1.24
Arhgap5	0.000679	18.3	1.9e-05	5.0124	1.57
Smim24	0.0121	11	0.000905	-1.40783	2.02
Jaml	2.44e-08	41.6	1.11e-10	3.90816	1.61
Otud3	0.00994	11.5	0.00069	2.65702	1.26
Rbm27	0.00722	12.3	0.000449	4.15593	1.35
Cxcl6	8.33e-05	23.2	1.44e-06	0.900519	2.23
Atf7ip	0.000375	19.7	9.3e-06	5.10473	1.22
Fcgr3a	0.00563	12.9	0.000325	2.66514	1.02
Prkce	0.00191	15.6	7.73e-05	3.13103	1.78
Ctnna3	0.005	13.2	0.00028	1.97383	1.46
Epb41l2	0.00095	17.4	3.03e-05	6.26833	1.18
Itga4	4.47e-07	35.1	3.08e-09	3.47839	2.79
Lrrc25	3.47e-05	25.3	4.86e-07	4.72445	1.11
Adprhl1	0.00603	12.8	0.000355	5.24278	1.87
Dtwd2	0.0267	9.06	0.00261	2.07245	1.02
Cd8a	1.76e-07	37.3	1e-09	4.81701	1.36
Pfkfb3	1.78e-05	26.9	2.19e-07	6.53203	1.1
Lmln	0.0219	9.56	0.00199	2.03358	1.07
Mdc1	0.038	8.2	0.0042	4.13635	1.28
Enpp3	4.72e-07	35	3.29e-09	6.36058	1.07
Mcu	0.00307	14.4	0.000147	4.09183	1.08
Tcaim	0.00391	13.8	0.000204	4.0766	1.1
Ocrl	0.00991	11.5	0.000686	3.43762	1.18
Picalm	0.000116	22.4	2.2e-06	6.84087	1.26
RGD1310335	0.00242	15	0.000107	1.75688	1.24
Stk24	0.00135	16.5	4.83e-05	4.41397	1.08
Tcf15	6.6e-08	39.5	3.34e-10	5.44559	-1.31
Ppial4d	2.72e-06	31.1	2.46e-08	5.6421	-2.24
LOC103689927	0.0396	8.1	0.00444	0.853125	-1.53
Polr2i	0.000329	20	7.89e-06	-0.44126	-2.64
Nrtn	0.000505	19	1.32e-05	3.20069	-1.32
Rn50_8_0587.1	0.0242	9.31	0.00229	-0.923482	-1.65
LOC100362366	0.00556	12.9	0.00032	2.86786	-1.03
LOC100911225	0.00707	12.4	0.000437	0.0885432	-2.78
Ndufa1	2.31e-11	57.1	4.13e-14	3.14895	-2.12
Rpl35a	0.0203	9.75	0.00179	0.250503	-1.24
Trmt61a	0.0353	8.38	0.0038	1.95078	-2.32
Rpl35al1	0.0132	10.8	0.00102	5.34213	-1.45
Ndufa2	1.89e-05	26.7	2.36e-07	7.61985	-1
Gstt2	0.0038	13.9	0.000196	3.32756	-1.05
Kansl2	0.00506	13.2	0.000284	1.7989	-1.82
NEWGENE_1308196	0.0012	16.8	4.08e-05	1.69623	-2.82
RGD1560797	6.57e-09	44.6	2.37e-11	3.44266	-1.84
Gm8225	0.0222	9.52	0.00203	0.180735	-1.33
Srms	0.00168	16	6.5e-05	0.847915	-1.45
Rn50_2_0457.1	0.0297	8.79	0.00302	0.437607	-1.15
Mt3	0.0191	9.9	0.00165	0.23262	-1.22
Kcnmb4	6.43e-06	29.2	6.69e-08	2.10178	-1.67
LOC689899	0.013	10.8	0.000994	1.41379	-1.26
Gpr27	0.00154	16.2	5.78e-05	0.422812	-1.63
Wfdc21	0.0274	9	0.00271	-0.776676	-1.49
AABR07015346.1	3.56e-11	56.1	6.82e-14	4.78929	-1.67
Pnmt	0.0227	9.46	0.0021	0.41609	-1.17
AABR07026317.1	0.000275	20.4	6.37e-06	3.77612	-1.22
Trappc2b	0.00217	15.3	9.2e-05	1.33131	-7.31
LOC103690002	0.00118	16.9	3.97e-05	0.866638	-1.68
Ndufa12	9.42e-05	22.9	1.7e-06	5.5538	-1.42
Pla2g2a	1.05e-10	53.9	2.13e-13	6.1604	-1.36
Inafm1	6.38e-08	39.5	3.21e-10	6.22123	-1.3
Rps29	0.00285	14.6	0.000134	2.469	-1.26
LOC103689956	4.78e-05	24.6	7.18e-07	4.2145	-1.44
Alox15	1.6e-06	32.3	1.34e-08	2.79147	-1.55
RGD1566136	0.00613	12.7	0.000363	-0.222592	-1.68
LOC103689986	0.0159	10.3	0.0013	2.59319	-1.13
Gng11	0.00863	11.9	0.000569	0.662818	-1.44
Cox7a2l2	1.64e-07	37.5	9.27e-10	9.37357	-1.03
Pcgf1	1.09e-15	78.7	7.08e-19	1.33363	-5.32
Cox6b1	2.68e-07	36.3	1.66e-09	6.44772	-1.16
Sapcd1	0.000207	21.1	4.45e-06	4.56431	-1.05
Lcn3	0.00895	11.8	0.000597	-0.513511	-1.61
LOC103690015	0.000155	21.7	3.15e-06	2.68348	-1.56
Uqcr10	1.45e-05	27.4	1.7e-07	8.51225	-1.02
Ndufa13	1.33e-06	32.7	1.07e-08	3.44702	-1.52
Rplp2	0.00273	14.7	0.000126	5.23207	-2.24
LOC100911994	1.82e-08	42.3	7.76e-11	1.38353	-3.71
RGD1561333	0.018	10.1	0.00152	-0.463378	-1.43
LOC100911110	0.00471	13.3	0.000259	6.01407	-1.09
NEWGENE_1549776	0.00917	11.7	0.000619	1.11418	-3.33
Rn50_1_0913.2	0.0424	7.92	0.0049	0.41122	-1.08
Rcor2	0.0178	10.1	0.0015	2.76598	-1.22
Fbxl22	1.36e-06	32.6	1.11e-08	5.25157	-1.27
AC098622.1	0.0199	9.79	0.00175	1.62975	-1.01
Tceb2	0.000621	18.5	1.7e-05	4.90967	-1.06
RGD1309036	0.00965	11.6	0.000662	2.76503	-1.03
Echs1	2.93e-05	25.7	3.93e-07	3.1393	-2.39
Gal	3.66e-06	30.4	3.48e-08	-0.137892	-2.62
LOC103689983	3.37e-08	40.9	1.6e-10	3.10075	-4.12
Sepw1	0.00242	15	0.000107	2.2804	-1.86
Ankrd2	0.00103	17.2	3.37e-05	3.80368	-1.12
Syt8	0.00343	14.1	0.00017	0.795201	-1.41
LOC100910017	0.00262	14.8	0.000119	2.77976	-1.06
LOC100364457	0.00152	16.2	5.69e-05	3.07967	-1.11
Ndufb7	5.96e-07	34.5	4.27e-09	7.91949	-1.18
Fam3b	0.0304	8.73	0.00313	0.356916	-1.13
RGD1563606	0.00654	12.6	0.000396	-0.683248	-1.73
Fam89a	0.00118	16.9	3.98e-05	3.28837	-1.04
LOC100912228	3.79e-05	25.1	5.42e-07	-0.168417	-3.43
LOC100361060	0.0346	8.43	0.0037	0.879879	-1.25
LOC103694872	2.06e-07	37	1.2e-09	6.45417	-2.89
Rn50_X_0699.2	0.0282	8.92	0.00282	1.15639	-1.65
Ndufa1	9.17e-07	33.6	6.93e-09	2.27532	-1.84
Mt1m	0.0421	7.93	0.00485	0.264924	-1.11
Rbm39	0.0437	7.85	0.00509	4.59814	-1.68
Rps29	0.00346	14.1	0.000172	2.59917	-1.25
Fam26e	0.000355	19.8	8.71e-06	3.34834	-1.13
Hprt1	0.0476	7.63	0.00574	1.34429	-1.17
Rpl31l4	0.000301	20.2	7.06e-06	3.93721	-1.19
AABR07035832.1	0.00917	11.7	0.000619	2.24075	-1.08
Igip	0.00632	12.6	0.000376	1.69977	-1.23
Ndufv3	2.4e-07	36.6	1.46e-09	8.30556	-1.06
Selenbp1	1.2e-07	38.2	6.39e-10	1.64164	-3.17
Ccdc152	3.33e-05	25.4	4.56e-07	5.01284	-1.16
LOC100910446	0.0165	10.3	0.00136	0.264034	-2.77
Dr1	0.0316	8.64	0.00328	1.17841	-1.27
Hoxb3	0.00349	14.1	0.000175	2.2582	-1.15
LOC100912604	1.06e-06	33.2	8.2e-09	2.51347	-2.31
Ptgds	0.000843	17.7	2.55e-05	2.87039	-1.12
Usmg5	0.00025	20.6	5.63e-06	5.39942	-1.16
AABR07014550.1	0.0287	8.88	0.00289	1.30859	-1.13
LOC100911713	2.22e-05	26.3	2.85e-07	1.09113	-2
Ewsr1	0.0196	9.84	0.0017	2.34466	-1.02
AABR07025896.1	0.0259	9.15	0.00249	-1.82446	-2.12
Cited4	0.00224	15.2	9.6e-05	3.25915	-1.17
LOC100361259	0.0281	8.93	0.00281	1.13974	-1.11
LOC100362298	0.04	8.07	0.0045	-0.157325	-1.22
Pdcd5	0.00519	13.1	0.000294	1.94005	-2.46
Ndufc1	4.42e-06	30	4.38e-08	6.55024	-1.04
Ogn	0.0303	8.74	0.00311	2.76416	-1.29
AABR07034445.1	9.77e-10	49	2.59e-12	6.17538	-1.39
LOC100911727	0.0028	14.6	0.000131	1.78749	-2
Rps15al4	0.0178	10.1	0.0015	2.15097	-1.7
LOC100911186	0.00195	15.6	7.93e-05	2.24748	-1.23
LOC100911483	3.25e-07	35.8	2.15e-09	8.51026	-1.11
Psme1-ps1	0.00907	11.8	0.000607	1.23215	-1.18
LOC100360491	0.00014	22	2.77e-06	3.14333	-1.5
Ccl17	0.0475	7.64	0.00572	-0.353879	-1.21
N4bp3	0.00568	12.9	0.000328	1.59207	-2.48
LOC690468	0.0353	8.38	0.0038	2.29588	-1.51
RGD1560831	0.0102	11.4	0.000715	1.90097	-1.09
Crybb1	0.0112	11.2	0.000811	2.79391	-1.01
Asic1	0.0232	9.41	0.00216	1.61133	-1.05
LOC100912034	0.00192	15.6	7.81e-05	1.61488	-1.36
Slc25a6	0.0147	10.5	0.00117	-0.0015792	-1.46
Nhp2	6.99e-09	44.5	2.61e-11	4.40399	-4.42
Mrpl36	0.000308	20.1	7.26e-06	0.58974	-5.56
AABR07064809.1	0.0111	11.2	0.0008	-0.237509	-1.4
Ly6h	0.0196	9.84	0.00171	0.19784	-1.31
AABR07009397.1	0.00125	16.7	4.37e-05	1.87263	-1.5
Hrct1	2.46e-06	31.3	2.19e-08	4.84854	-1.23
Grcc10	4.05e-05	25	5.86e-07	1.90197	-2.79
Aamdc	0.00279	14.6	0.00013	3.74117	-1.02
LOC680121	0.00359	14	0.000182	7.39783	-1.79
Lrrc10	0.0131	10.8	0.00101	4.7876	-1.27
LOC100911440	0.00655	12.5	0.000397	1.73642	-1.71
Ms4a6bl	4.52e-07	35.1	3.12e-09	0.925646	-2.54
LOC100912571	0.00204	15.5	8.47e-05	2.96693	-1.32
LOC685963	0.0041	13.7	0.000217	1.09238	-1.44
LOC103691423	0.0128	10.9	0.000976	1.60626	-1.18
Sln	0.000911	17.5	2.86e-05	-0.717233	-2.39
Car4	0.000314	20.1	7.44e-06	4.81966	-1
LOC691427	1.31e-07	38	7.17e-10	6.99127	-1.1
Polr2l	1.49e-06	32.4	1.24e-08	1.86294	-2.06
Rn60_10_0923.1	0.00197	15.5	8.08e-05	3.70279	-1.03
Hba-a2	4.34e-06	30	4.27e-08	9.3417	-1.03
LOC100361008	9.02e-07	33.6	6.79e-09	5.97981	-1.3
Ubald1	6.09e-05	24	9.76e-07	1.6868	-3.17
Rn50_6_1033.1	0.00455	13.4	0.000248	2.13329	-1.15
AABR07064810.1	0.0146	10.6	0.00116	2.04766	-1.03
Apopt1	0.0111	11.2	0.000801	0.944669	-1.94
Mrpl53	0.036	8.33	0.0039	1.24938	-1.08
LOC100362684	0.00182	15.7	7.26e-05	2.49412	-1.33
Hist2h2aa3	0.00488	13.3	0.00027	1.05753	-2.98
Ndufb2	1.04e-06	33.3	7.93e-09	7.61357	-1.07
AABR07011951.1	0.00162	16	6.2e-05	3.76103	-2.86
Clec3b	0.00104	17.2	3.42e-05	3.7243	-1.05
AABR07005844.1	0.0224	9.49	0.00206	1.22702	-1.37
Colec11	0.00556	13	0.00032	2.38352	-1.03
LOC100912030	0.00088	17.6	2.71e-05	-0.312038	-1.84
Ndufv3-ps1	2.42e-07	36.6	1.48e-09	2.59486	-1.82
Fxyd3	0.00166	16	6.39e-05	1.19273	-1.44
LOC679739	6.76e-07	34.2	4.9e-09	3.7037	-2.86
Klf2	4.61e-07	35.1	3.2e-09	7.08246	-1.04
RT1-S2	0.000733	18.1	2.13e-05	-0.228879	-3.49
Ndufs5	3.9e-05	25	5.63e-07	4.32832	-1.23
RGD1564883	0.00144	16.3	5.28e-05	2.58399	-2.32
Hnrnpab	2.79e-05	25.8	3.7e-07	5.90289	-1.97
Pgam2	2.18e-06	31.6	1.9e-08	8.47347	-1.02
Tbcb	0.000936	17.4	2.96e-05	1.98142	-3.03
AABR07056556.2	0.00477	13.3	0.000264	1.53367	-1.24
LOC100911730	0.00461	13.4	0.000252	3.85947	-1.23
LOC689728	0.00185	15.7	7.46e-05	3.37781	-1.08
Etd	0.00863	11.9	0.000569	-1.34774	-2.1
Tma7	0.000566	18.7	1.53e-05	3.31471	-2.42
AABR07012775.1	0.0159	10.3	0.0013	-1.13034	-2.03
AC136482.1	0.005	13.2	0.00028	-2.61769	-4.83
Gstm5	0.00583	12.8	0.00034	0.0952739	-2.99
Uqcrq	7.06e-09	44.4	2.66e-11	9.90115	-1.27
RGD1565653	0.00444	13.5	0.00024	-1.32126	-2.34
LOC100911101	0.0163	10.3	0.00134	1.94594	-1.99
Gtpbp6	0.0482	7.6	0.00583	2.26392	-1.53
Ndufa5	2.21e-07	36.8	1.31e-09	9.28319	-1.06
LOC100360841	0.00097	17.4	3.1e-05	0.192239	-1.7
RGD1566369	0.0303	8.75	0.0031	1.80698	-1.1
Fxyd7	0.0081	12	0.000524	2.14992	-1.06
LOC687780	1.65e-06	32.2	1.4e-08	2.80439	-1.79
Ino80b	0.00207	15.4	8.67e-05	0.214026	-1.73
